# Supplementary material for: Sex-Specific Effects of Nutritional Supplements for Infants Born Early or Small: An Individual Participant Data Meta-Analysis (ESSENCE IPD-MA) II: Growth
Source: MDPI journal article supplement (doi:10.3390/nu14020392), 2022-01-17
Supplement: s1 [file s1]

## Supplementary

Text S1. PRISMA-IPD Checklist of items to include when reporting a systematic review and meta-analysis of individual participant data (IPD)

Text S2. Comparison of macronutrient intakes

Text S3. References of Table 1

Figure S1. Combined IPD and AD analysis of BMI

Figure S2. IPD analysis of BMI z-scores

Figure S3. IPD analysis of weight

Figure S4. Combined IPD and AD analysis of weight

Figure S5. Forest plot of effect of macronutrient supplementation on weight z-scores

Figure S6. IPD analysis of length/height

Figure S7. Combined IPD and AD analysis of length/height

Figure S8. Forest plot of effect of macronutrient supplementation on length/height z-scores

Figure S9. IPD analysis of weight for length z-scores

Figure S10. IPD analysis of head circumference.

Figure S11. Combined IPD and AD analysis of head circumference

Figure S12. Forest plot of effect of macronutrient supplementation on head circumference z-scores

Figure S13. Forest plot of effect of macronutrient supplementation on fat mass

Figure S14. Forest plot of effect of macronutrient supplementation on fat mass index.

Figure S15. Forest plot of effect of macronutrient supplementation on percent fat mass

Figure S16. Forest plot of effect of macronutrient supplementation on lean mass

Figure S17. Forest plot of effect of macronutrient supplementation on lean mass index

Figure S18. Forest plot of effect of macronutrient supplementation on bone mineral content

Figure S19. Forest plot of effect of macronutrient supplementation on bone mineral density

Table S1. Risk of bias within studies

Table S2. Subgroup analyses of infant sex

Table S3. Subgroup analyses of size for gestation of the infant

Table S4. Subgroup analyses of size of infant at birth

Table S5. Subgroup analyses of gestational age of infant at birth

Table S6. Subgroup analyses of timing of supplements

Table S7. Subgroup analyses of type of supplement

Table S8. Subgroup analyses of primary milk feed

Table S9. Subgroup analyses of different epochs

Table S10. Search strategies

Table S11. List of excluded studies

**Text S1. PRISMA-IPD Checklist of items to include when reporting a systematic review and meta-analysis of individual participant data (IPD)**

| PRISMA-IPD<br>Section/topic                        | Item<br>No | Checklist item                                                                                                                                                                                                                                                                                                                                                                                                                                                                                                          | Reported on<br>page            |
|----------------------------------------------------|------------|-------------------------------------------------------------------------------------------------------------------------------------------------------------------------------------------------------------------------------------------------------------------------------------------------------------------------------------------------------------------------------------------------------------------------------------------------------------------------------------------------------------------------|--------------------------------|
| <b>Title</b>                                       |            |                                                                                                                                                                                                                                                                                                                                                                                                                                                                                                                         |                                |
| Title                                              | 1          | Identify the report as a systematic review and meta-analysis of individual participant data.                                                                                                                                                                                                                                                                                                                                                                                                                            | Title page                     |
| <b>Abstract</b>                                    |            |                                                                                                                                                                                                                                                                                                                                                                                                                                                                                                                         |                                |
| Structured<br>summary                              | 2          | Provide a structured summary including as applicable:                                                                                                                                                                                                                                                                                                                                                                                                                                                                   | Abstract, Title<br>page        |
|                                                    |            | <b>Background:</b> state research question and main objectives, with information on participants, interventions, comparators and outcomes.                                                                                                                                                                                                                                                                                                                                                                              |                                |
|                                                    |            | <b>Methods:</b> report eligibility criteria; data sources including dates of last bibliographic search or elicitation, noting that IPD were sought; methods of assessing risk of bias.                                                                                                                                                                                                                                                                                                                                  |                                |
|                                                    |            | <b>Results:</b> provide number and type of studies and participants identified and number (%) obtained; summary effect estimates for main outcomes (benefits and harms) with confidence intervals and measures of statistical heterogeneity. Describe the direction and size of summary effects in terms meaningful to those who would put findings into practice.                                                                                                                                                      |                                |
|                                                    |            | <b>Discussion:</b> state main strengths and limitations of the evidence, general interpretation of the results and any important implications.                                                                                                                                                                                                                                                                                                                                                                          |                                |
|                                                    |            | <b>Other:</b> report primary funding source, registration number and registry name for the systematic review and IPD meta-analysis.                                                                                                                                                                                                                                                                                                                                                                                     |                                |
| <b>Introduction</b>                                |            |                                                                                                                                                                                                                                                                                                                                                                                                                                                                                                                         |                                |
| Rationale                                          | 3          | Describe the rationale for the review in the context of what is already known.                                                                                                                                                                                                                                                                                                                                                                                                                                          | Introduction:<br>paragraph 1-2 |
| Objectives                                         | 4          | Provide an explicit statement of the questions being addressed with reference, as applicable, to participants, interventions, comparisons, outcomes and study design (PICOS). Include any hypotheses that relate to particular types of participant-level subgroups.                                                                                                                                                                                                                                                    | Introduction:<br>paragraph 3   |
| <b>Methods</b>                                     |            |                                                                                                                                                                                                                                                                                                                                                                                                                                                                                                                         |                                |
| Protocol and<br>registration                       | 5          | Indicate if a protocol exists and where it can be accessed. If available, provide registration information including registration number and registry name. Provide publication details, if applicable.                                                                                                                                                                                                                                                                                                                 | Methods:<br>paragraph 1        |
| Eligibility<br>criteria                            | 6          | Specify inclusion and exclusion criteria including those relating to participants, interventions, comparisons, outcomes, study design and characteristics (e.g. years when conducted, required minimum follow-up). Note whether these were applied at the study or individual level i.e. whether eligible participants were included (and ineligible participants excluded) from a study that included a wider population than specified by the review inclusion criteria. The rationale for criteria should be stated. | Methods: 2.2                   |
| Identifying<br>studies -<br>information<br>sources | 7          | Describe all methods of identifying published and unpublished studies including, as applicable: which bibliographic databases were searched with dates of coverage; details of any hand searching including of conference proceedings; use of study registers and agency or company databases; contact with the original research team and experts in the field; open adverts and surveys. Give the date of last search or elicitation.                                                                                 | Methods: 2.1                   |

|                                                |    |                                                                                                                                                                                                                                                                                                                                                                                                                                                                                                                                                                                                                                                                                                                                                                                                                                                                                                                                                                                                                                   |                        |
|------------------------------------------------|----|-----------------------------------------------------------------------------------------------------------------------------------------------------------------------------------------------------------------------------------------------------------------------------------------------------------------------------------------------------------------------------------------------------------------------------------------------------------------------------------------------------------------------------------------------------------------------------------------------------------------------------------------------------------------------------------------------------------------------------------------------------------------------------------------------------------------------------------------------------------------------------------------------------------------------------------------------------------------------------------------------------------------------------------|------------------------|
| Identifying studies - search                   | 8  | Present the full electronic search strategy for at least one database, including any limits used, such that it could be repeated.                                                                                                                                                                                                                                                                                                                                                                                                                                                                                                                                                                                                                                                                                                                                                                                                                                                                                                 | Table S10              |
| Study selection processes                      | 9  | State the process for determining which studies were eligible for inclusion.                                                                                                                                                                                                                                                                                                                                                                                                                                                                                                                                                                                                                                                                                                                                                                                                                                                                                                                                                      | Methods: 2.2           |
| Data collection processes                      | 10 | Describe how IPD were requested, collected and managed, including any processes for querying and confirming data with investigators. If IPD were not sought from any eligible study, the reason for this should be stated (for each such study).                                                                                                                                                                                                                                                                                                                                                                                                                                                                                                                                                                                                                                                                                                                                                                                  | Methods: 2.2, 2.4, 2.5 |
|                                                |    | If applicable, describe how any studies for which IPD were not available were dealt with. This should include whether, how and what aggregate data were sought or extracted from study reports and publications (such as extracting data independently in duplicate) and any processes for obtaining and confirming these data with investigators.                                                                                                                                                                                                                                                                                                                                                                                                                                                                                                                                                                                                                                                                                |                        |
| Data items                                     | 11 | Describe how the information and variables to be collected were chosen. List and define all study level and participant level data that were sought, including baseline and follow-up information. If applicable, describe methods of standardising or translating variables within the IPD datasets to ensure common scales or measurements across studies.                                                                                                                                                                                                                                                                                                                                                                                                                                                                                                                                                                                                                                                                      | Methods: 2.2, 2.4, 2.5 |
| IPD integrity                                  | A1 | Describe what aspects of IPD were subject to data checking (such as sequence generation, data consistency and completeness, baseline imbalance) and how this was done.                                                                                                                                                                                                                                                                                                                                                                                                                                                                                                                                                                                                                                                                                                                                                                                                                                                            | Methods: 2.3           |
| Risk of bias assessment in individual studies. | 12 | Describe methods used to assess risk of bias in the individual studies and whether this was applied separately for each outcome. If applicable, describe how findings of IPD checking were used to inform the assessment. Report if and how risk of bias assessment was used in any data synthesis.                                                                                                                                                                                                                                                                                                                                                                                                                                                                                                                                                                                                                                                                                                                               | Methods: 2.3           |
| Specification of outcomes and effect measures  | 13 | State all treatment comparisons of interests. State all outcomes addressed and define them in detail. State whether they were pre-specified for the review and, if applicable, whether they were primary/main or secondary/additional outcomes. Give the principal measures of effect (such as risk ratio, hazard ratio, difference in means) used for each outcome.                                                                                                                                                                                                                                                                                                                                                                                                                                                                                                                                                                                                                                                              | Methods: 2.2, 2.4, 2.5 |
| Synthesis methods                              | 14 | Describe the meta-analysis methods used to synthesise IPD. Specify any statistical methods and models used. Issues should include (but are not restricted to): <ul style="list-style-type: none"> <li>• Use of a one-stage or two-stage approach.</li> <li>• How effect estimates were generated separately within each study and combined across studies (where applicable).</li> <li>• Specification of one-stage models (where applicable) including how clustering of patients within studies was accounted for.</li> <li>• Use of fixed or random effects models and any other model assumptions, such as proportional hazards.</li> <li>• How (summary) survival curves were generated (where applicable).</li> <li>• Methods for quantifying statistical heterogeneity (such as <math>I^2</math> and <math>\tau^2</math>).</li> <li>• How studies providing IPD and not providing IPD were analysed together (where applicable).</li> <li>• How missing data within the IPD were dealt with (where applicable).</li> </ul> | Methods: 2.4, 2.5      |

|                                     |    |                                                                                                                                                                                                                                                                                                                                                                                                                                                                   |                                                     |
|-------------------------------------|----|-------------------------------------------------------------------------------------------------------------------------------------------------------------------------------------------------------------------------------------------------------------------------------------------------------------------------------------------------------------------------------------------------------------------------------------------------------------------|-----------------------------------------------------|
| Exploration of variation in effects | A2 | If applicable, describe any methods used to explore variation in effects by study or participant level characteristics (such as estimation of interactions between effect and covariates). State all participant-level characteristics that were analysed as potential effect modifiers, and whether these were pre-specified.                                                                                                                                    | Methods: 2.4, 2.5                                   |
| Risk of bias across studies         | 15 | Specify any assessment of risk of bias relating to the accumulated body of evidence, including any pertaining to not obtaining IPD for particular studies, outcomes or other variables.                                                                                                                                                                                                                                                                           | Methods: 2.3                                        |
| Additional analyses                 | 16 | Describe methods of any additional analyses, including sensitivity analyses. State which of these were pre-specified.                                                                                                                                                                                                                                                                                                                                             | Methods: 2.4, 2.5                                   |
| <b>Results</b>                      |    |                                                                                                                                                                                                                                                                                                                                                                                                                                                                   |                                                     |
| Study selection and IPD obtained    | 17 | Give numbers of studies screened, assessed for eligibility, and included in the systematic review with reasons for exclusions at each stage. Indicate the number of studies and participants for which IPD were sought and for which IPD were obtained. For those studies where IPD were not available, give the numbers of studies and participants for which aggregate data were available. Report reasons for non-availability of IPD. Include a flow diagram. | Results: 3.1, Figure 1                              |
| Study characteristics               | 18 | For each study, present information on key study and participant characteristics (such as description of interventions, numbers of participants, demographic data, unavailability of outcomes, funding source, and if applicable duration of follow-up). Provide (main) citations for each study. Where applicable, also report similar study characteristics for any studies not providing IPD.                                                                  | Table 1                                             |
| IPD integrity                       | A3 | Report any important issues identified in checking IPD or state that there were none.                                                                                                                                                                                                                                                                                                                                                                             | Results: search result                              |
| Risk of bias within studies         | 19 | Present data on risk of bias assessments. If applicable, describe whether data checking led to the up-weighting or down-weighting of these assessments. Consider how any potential bias impacts on the robustness of meta-analysis conclusions.                                                                                                                                                                                                                   | Results: 3.2<br>Table S1                            |
| Results of individual studies       | 20 | For each comparison and for each main outcome (benefit or harm), for each individual study report the number of eligible participants for which data were obtained and show simple summary data for each intervention group (including, where applicable, the number of events), effect estimates and confidence intervals. These may be tabulated or included on a forest plot.                                                                                  | Results: 3.3-3.6, Figure 2, Figure 3, Figure S1-S19 |
| Results of syntheses                | 21 | Present summary effects for each meta-analysis undertaken, including confidence intervals and measures of statistical heterogeneity. State whether the analysis was pre-specified, and report the numbers of studies and participants and, where applicable, the number of events on which it is based.                                                                                                                                                           | Results: 3.3-3.7, Figure 2, Figure 3, Figure S1-S19 |
|                                     |    | When exploring variation in effects due to patient or study characteristics, present summary interaction estimates for each characteristic examined, including confidence intervals and measures of statistical heterogeneity. State whether the analysis was pre-specified. State whether any interaction is consistent across trials.                                                                                                                           |                                                     |
|                                     |    | Provide a description of the direction and size of effect in terms meaningful to those who would put findings into practice.                                                                                                                                                                                                                                                                                                                                      |                                                     |
| Risk of bias across studies         | 22 | Present results of any assessment of risk of bias relating to the accumulated body of evidence, including any pertaining to the availability and representativeness of available studies, outcomes or other variables.                                                                                                                                                                                                                                            | Results: 3.2<br>Table S1                            |

|                           |    |                                                                                                                                                                                                                                                                                                                                       |                                                                  |
|---------------------------|----|---------------------------------------------------------------------------------------------------------------------------------------------------------------------------------------------------------------------------------------------------------------------------------------------------------------------------------------|------------------------------------------------------------------|
| Additional analyses       | 23 | Give results of any additional analyses (e.g. sensitivity analyses). If applicable, this should also include any analyses that incorporate aggregate data for studies that do not have IPD. If applicable, summarise the main meta-analysis results following the inclusion or exclusion of studies for which IPD were not available. | Results: 3.3-3.7, Figure 2, Figure 3, Figure S1-S19, Table S2-S9 |
| <b>Discussion</b>         |    |                                                                                                                                                                                                                                                                                                                                       |                                                                  |
| Summary of evidence       | 24 | Summarise the main findings, including the strength of evidence for each main outcome.                                                                                                                                                                                                                                                | Discussion: paragraph 1-2, Fig 4, Fig 5                          |
| Strengths and limitations | 25 | Discuss any important strengths and limitations of the evidence including the benefits of access to IPD and any limitations arising from IPD that were not available.                                                                                                                                                                 | Discussion: paragraph 12-13                                      |
| Conclusions               | 26 | Provide a general interpretation of the findings in the context of other evidence.                                                                                                                                                                                                                                                    | Discussion: paragraph 14                                         |
| Implications              | A4 | Consider relevance to key groups (such as policy makers, service providers and service users). Consider implications for future research.                                                                                                                                                                                             | Discussion: paragraph 14                                         |
| <b>Funding</b>            |    |                                                                                                                                                                                                                                                                                                                                       |                                                                  |
| Funding                   | 27 | Describe sources of funding and other support (such as supply of IPD), and the role in the systematic review of those providing such support.                                                                                                                                                                                         | Funding, acknowledge, author contribution                        |

A1 – A3 denote new items that are additional to standard PRISMA items. A4 has been created as a result of re-arranging content of the standard PRISMA statement to suit the way that systematic review IPD meta-analyses are reported.

© Reproduced with permission of the PRISMA IPD Group, which encourages sharing and reuse for non-commercial purpose

## Text S2. Comparison of macronutrient intake

### a. Macronutrient intakes between trials using formula as primary feed and breast milk as primary feed.

To explore whether the differences in effects of supplements between infants receiving breast milk or formula as their primary feed were due to different baseline macronutrient intakes or quantity of supplements, we compared the mean macronutrient intakes in the unsupplemented groups receiving breast milk or formula as their primary feed, and the mean difference in intakes between supplemented and unsupplemented groups. Infants in the unsupplemented group who received formula as their primary feed had higher protein intake, but similar fat, carbohydrate and energy intakes to those whose primary feed was breastmilk. However, amongst infants who received breastmilk as their primary feed, those in the supplemented group received more protein, energy and carbohydrate than those in unsupplemented group, whereas amongst infants who received formula as their primary feed, the supplemented formula group received much smaller increases in protein, energy and carbohydrate than the unsupplemented group.

|                                                                                                                                                                                                         | Breast milk |      | Formula |      | P Value |
|---------------------------------------------------------------------------------------------------------------------------------------------------------------------------------------------------------|-------------|------|---------|------|---------|
|                                                                                                                                                                                                         | Mean        | SD   | Mean    | SD   |         |
| Mean intakes in the unsupplemented groups                                                                                                                                                               |             |      |         |      |         |
| Protein (g/100 ml)                                                                                                                                                                                      | 1.43        | 0.24 | 1.64    | 0.33 | 0.26    |
| Fat (g/100 ml)                                                                                                                                                                                          | 4           | 0.49 | 3.94    | 0.39 | 0.84    |
| Carbohydrate (g/100 ml)                                                                                                                                                                                 | 6.53        | 2.33 | 7.26    | 0.45 | 0.49    |
| Energy (g/100 ml)                                                                                                                                                                                       | 68          | 5.29 | 70.17   | 4.92 | 0.48    |
| Mean differences intakes between supplemented and unsupplemented groups                                                                                                                                 |             |      |         |      |         |
| Protein (g/100 ml)                                                                                                                                                                                      | 0.92        | 0.49 | 0.46    | 0.15 | 0.07    |
| Fat (g/100 ml)                                                                                                                                                                                          | 0.06        | 0.73 | 0.14    | 0.21 | 0.84    |
| Carbohydrate (g/100 ml)                                                                                                                                                                                 | 2.15        | 0.46 | 0.24    | 0.17 | 0.0001  |
| Energy (g/100 ml)                                                                                                                                                                                       | 11.5        | 6.89 | 5.17    | 3.37 | 0.07    |
| The composition information for formulae were from IPD or extracted from the publications, and the composition of breastmilk was from IPD or estimated according to the recent guideline <sup>1</sup> . |             |      |         |      |         |

### b. Macronutrient intakes between trials conducted up to 2000 and those conducted after 2000.

To explore whether the differences in effects of supplements between trials conducted before or after 2000 were due to gradual increases in baseline macronutrient intakes over time, we compared the mean macronutrient intakes in the unsupplemented groups in trials conducted before or after 2000, and the mean differences in intakes between supplemented and unsupplemented groups. This showed that there were no significant differences between the two epochs in mean baseline intakes or in mean differences in intake between supplemented and unsupplemented groups for protein, fat, carbohydrate or energy.

|                                                                         | Before and during 2000 |      | After 2000 |      | P Value |
|-------------------------------------------------------------------------|------------------------|------|------------|------|---------|
|                                                                         | Mean                   | SD   | Mean       | SD   |         |
| Mean intakes in the unsupplemented groups                               |                        |      |            |      |         |
| Protein (g/100 ml)                                                      | 1.46                   | 0.15 | 1.58       | 0.38 | 0.52    |
| Fat (g/100 ml)                                                          | 3.87                   | 0.25 | 4.05       | 0.53 | 0.54    |
| Carbohydrate (g/100 ml)                                                 | 7.03                   | 0.12 | 6.68       | 2.39 | 0.78    |
| Energy (g/100 ml)                                                       | 68                     | 1.1  | 70.17      | 7.14 | 0.48    |
| Mean differences intakes between supplemented and unsupplemented groups |                        |      |            |      |         |
| Protein (g/100 ml)                                                      | 0.54                   | 0.15 | 0.86       | 0.55 | 0.23    |

|                                                                                                                                                                                                         |      |      |      |      |      |
|---------------------------------------------------------------------------------------------------------------------------------------------------------------------------------------------------------|------|------|------|------|------|
| Fat (g/100 ml)                                                                                                                                                                                          | 0.18 | 0.15 | 0.03 | 0.73 | 0.69 |
| Carbohydrate (g/100 ml)                                                                                                                                                                                 | 0.92 | 1.21 | 1.6  | 0.95 | 0.39 |
| Energy (g/100 ml)                                                                                                                                                                                       | 7.5  | 3.89 | 9.17 | 8.13 | 0.66 |
| The composition information for formulae were from IPD or extracted from the publications, and the composition of breastmilk was from IPD or estimated according to the recent guideline <sup>1</sup> . |      |      |      |      |      |

## References

1. National Health & Medical Research Council (NHMRC). Dietary guidelines for children and adolescents in Australia - incorporating the infant feeding guidelines for health workers. Australia: The National Health and Medical Research Council; 2003 [updated 10 April 2003; cited 2019 17 June ]. Available from: [http://childaustralia.nrooms.net/pluginfile.php/4134/mod\\_page/content/38/diet-guidelines.pdf](http://childaustralia.nrooms.net/pluginfile.php/4134/mod_page/content/38/diet-guidelines.pdf)

## Text S3. References of Table 1

### Agosti 2003

Agosti M, Vegni C, Calciolari G, Marini A, Group GS. Post-discharge nutrition of the very low-birthweight infant: interim results of the multicentric GAMMA study. *Acta Paediatr Suppl.* 2003;91(441):39-43.

### Atkinson 1999

Atkinson SA, Randall-Simpson J, Chang M, Paes B. Randomized trial of feeding nutrient-enriched vs standard formula to premature infants during the first year of life. *Pediatr Res.* 1999;45:276.

### Biasini 2012

Biasini A, Marvulli L, Neri E, China M, Stella M, Monti F. Growth and neurological outcome in ELBW preterms fed with human milk and extra-protein supplementation as routine practice: do we need further evidence? *J Matern Fetal Neonatal Med.* 2012;25 Suppl 4:72-4.

### Brunton 1998

Brunton JA, Saigal S, Atkinson SA. Growth and body composition in infants with bronchopulmonary dysplasia up to 3 months corrected age: a randomized trial of a high-energy nutrient-enriched formula fed after hospital discharge. *J Pediatr.* 1998;133(3):340-5.

### Cooke 1998

Cooke RJ, Embleton ND, Griffin IJ, Wells JC, McCormick KP. Feeding preterm infants after hospital discharge: growth and development at 18 months of age. *Pediatr Res.* 2001;49(5):719-22.

### Embleton 2005

Embleton ND, Cooke RJ. Protein requirements in preterm infants: effect of different levels of protein intake on growth and body composition. *Pediatr Res.* 2005;58(5):855-60.

### Fewtrell 2001

Fewtrell MS, Morley R, Abbott RA, Singhal A, Stephenson T, MacFadyen UM, et al. Catch-up growth in small-for-gestational-age term infants: a randomized trial. *Am J Clin Nutr.* 2001;74(4):516-23.

### Koo 2006

Koo WW, Hockman EM. Posthospital discharge feeding for preterm infants: effects of standard compared with enriched milk formula on growth, bone mass, and body composition. *Am J Clin Nutr.* 2006;84(6):1357-64.

### **Litmanovitz 2007**

Litmanovitz I, Eliakim A, Arnon S, Regev R, Bauer S, Shainkin-Kestenbaum R, et al. Enriched post-discharge formula versus term formula for bone strength in very low birth weight infants: a longitudinal pilot study. *J Perinat Med.* 2007;35(5):431-5.

### **Lucas 1996**

Lucas A, Fewtrell MS, Morley R, Lucas PJ, Baker BA, Lister G, et al. Randomized outcome trial of human milk fortification and developmental outcome in preterm infants. *Am J Clin Nutr.* 1996;64(2):142-51.

### **Lucas 2001**

Lucas A, Fewtrell MS, Morley R, Singhal A, Abbott RA, Isaacs E, et al. Randomized trial of nutrient-enriched formula versus standard formula for postdischarge preterm infants. *Pediatrics.* 2001;108(3):703-11.

### **Moltu 2013**

Moltu SJ, Strommen K, Blakstad EW, Almaas AN, Westerberg AC, Braekke K, et al. Enhanced feeding in very-low-birth-weight infants may cause electrolyte disturbances and septicemia--a randomized, controlled trial. *Clin Nutr.* 2013;32(2):207-12.

### **Morgan 2014**

Morgan C, McGowan P, Herwitker S, Hart AE, Turner MA. Postnatal head growth in preterm infants: a randomized controlled parenteral nutrition study. *Pediatrics.* 2014;133(1):e120-8.

### **Mukhopadhyay 2007**

Mukhopadhyay K, Narnag A, Mahajan R. Effect of human milk fortification in appropriate for gestation and small for gestation preterm babies: a randomized controlled trial. *Indian Pediatr.* 2007;44(4):286-90.

### **Picaud 2008**

Picaud JC, Decullier E, Plan O, Pidoux O, Bin-Dorel S, van Egroo LD, et al. Growth and bone mineralization in preterm infants fed preterm formula or standard term formula after discharge. *J Pediatr.* 2008;153(5):616-21, 21 e1-2.

### **Rochow 2019**

Rochow N, Fusch G, Ali A, Bhatia A, So HY, Iskander R, et al. Individualized target fortification of breast milk with protein, carbohydrates, and fat for preterm infants: a double-blind randomised controlled trial. *Clin Nutr.* 2020;04:031.

### **Roggero 2012**

Roggero P, Gianni ML, Amato O, Liotto N, Morlacchi L, Orsi A, et al. Growth and fat-free mass gain in preterm infants after discharge: a randomized controlled trial. *Pediatrics.* 2012;130(5):e1215-21.

### **Tan 2008**



Tan MJ, Cooke RW. Improving head growth in very preterm infants--a randomised controlled trial I: neonatal outcomes. *Arch Dis Child Fetal Neonatal Ed.* 2008;93(5):F337-41.

### **Zachariassen 2001**

Zachariassen G, Faerk J, Grytter C, Esberg BH, Hjelmberg J, Mortensen S, et al. Nutrient enrichment of mother's milk and growth of very preterm infants after hospital discharge. *Pediatrics.* 2011;127(4):e995-e1003.

### **Amesz 2010**

Amesz EM, Schaafsma A, Cranendonk A, Lafeber HN. Optimal growth and lower fat mass in preterm infants fed a protein-enriched postdischarge formula. *J Pediatr Gastroenterol Nutr.* 2010;50(2):200-7.

### **Bellagamba 2016**

Bellagamba MP, Carmenati E, D'Ascenzo R, Malatesta M, Spagnoli C, Biagetti C, et al. One extra gram of protein to preterm infants from birth to 1800 g: a single-blinded randomized clinical trial. *J Pediatr Gastroenterol Nutr.* 2016;62(6):879-84.

### **Brooke 1985**

Brooke OG, Kinsey JM. High energy feeding in small for gestation infants. *Arch Dis Child.* 1985;60(1):42-6.

### **Carver 2001**

Carver JD, Wu PY, Hall RT, Ziegler EE, Sosa R, Jacobs J, et al. Growth of preterm infants fed nutrient-enriched or term formula after hospital discharge. *Pediatrics.* 2001;107(4):683-9.

### **Chan 1994**

Chan GM, Borschel MW, Jacobs JR. Effects of human milk or formula feeding on the growth, behavior, and protein status of preterm infants discharged from the newborn intensive care unit. *Am J Clin Nutr.* 1994;60(5):710-6.

### **Cooper 1985**

Cooper PA, Rothberg AD. Feeding of very-low-birth-weight infants with special formula--continued use beyond 2000 g and effects on growth to 1 year. *S Afr Med J.* 1985;67(18):716-8.

### **De Curtis 2002**

De Curtis M, Pieltain C, Rigo J. Body composition in preterm infants fed standard term or enriched formula after hospital discharge. *Eur J Nutr.* 2002;41(4):177-82.

### **Dogra 2017**

Dogra S, Thakur A, Garg P, Kler N. Effect of differential enteral protein on growth and neurodevelopment in infants <1500 g: a randomized controlled trial. *J Pediatr.* 2017;64(5):e126-e32.

### **Jeon 2011**

Jeon GW, Jung YJ, Koh SY, Lee YK, Kim KA, Shin SM, et al. Preterm infants fed nutrient-enriched formula until 6 months show improved growth and development. *Pediatr Int.* 2011;53(5):683-8.

**Lin 2004**

Lin YF, Hsieh KS, Chen YY. Nutrient-enriched versus standard term formula feeding in disproportionately small for gestational age infants. *Clin Neonatology*. 2004;11(2):36-9.

**Lucas 1989**

Lucas A, Morley R, Cole TJ, Gore SM, Davis JA, Bamford MF, et al. Early diet in preterm babies and developmental status in infancy. *Arch Dis Child*. 1989;64(11):1570-8.

**Lucas 1990**

Lucas A, Morley R, Cole TJ, Gore SM, Lucas PJ, Crowle P, et al. Early diet in preterm babies and developmental status at 18 months. *Lancet*. 1990;335(8704):1477-81.

**Lucas 1992**

Lucas A, Bishop NJ, King FJ, Cole TJ. Randomised trial of nutrition for preterm infants after discharge. *Arch Dis Child*. 1992;67(3):324-7.

**O'Connor 2008**

O'Connor DL, Khan S, Weishuhn K, Vaughan J, Jefferies A, Campbell DM, et al. Growth and nutrient intakes of human milk-fed preterm infants provided with extra energy and nutrients after hospital discharge. *Pediatrics*. 2008;121(4):766-76.

**Svenningsen 1982**

Svenningsen NW, Lindroth M, Lindquist B. A comparative study of varying protein intake in low birthweight infant feeding. *Acta Paediatr Suppl*. 1982;296:28-31.

**Wauben 1998**

Wauben IP, Atkinson SA, Shah JK, Paes B. Growth and body composition of preterm infants: influence of nutrient fortification of mother's milk in hospital and breastfeeding post-hospital discharge. *Acta Paediatr*. 1998;87(7):780-5.

**Wheeler 1996**

Wheeler RE, Hall RT. Feeding of premature infant formula after hospital discharge of infants weighing less than 1800 grams at birth. *J Perinatol*. 1996;16(2 Pt 1):111-6.

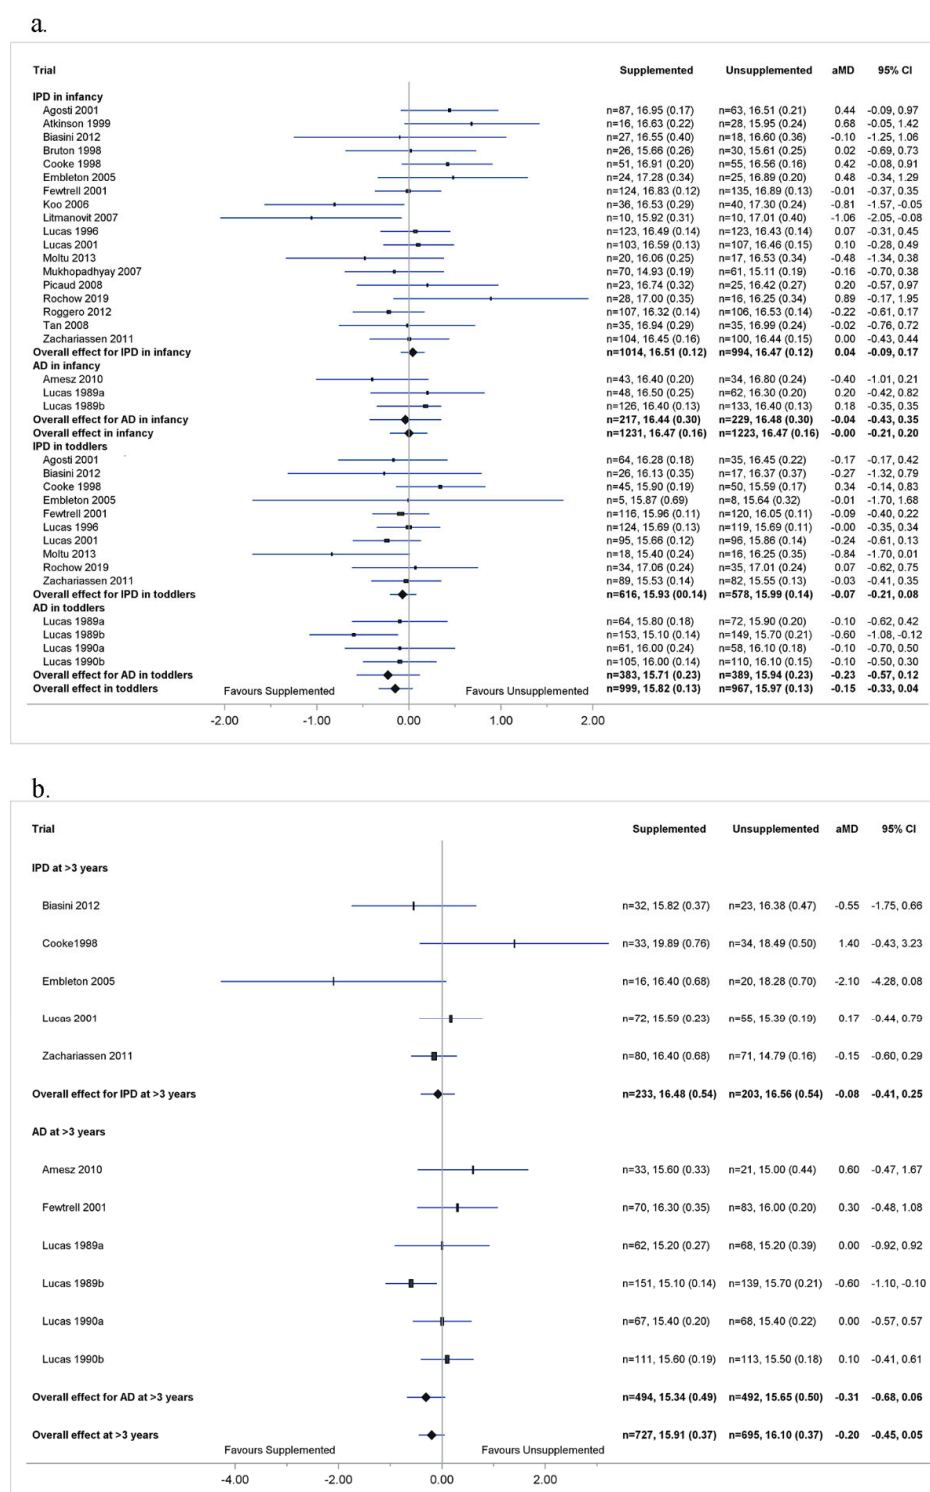

**Figure S1. Combined IPD and AD analysis of BMI.** a. in infancy and toddlers, b. at >3 years. Data are mean and standard error, with adjusted mean difference (aMD) for treatment effect and 95% confidence intervals (CIs) adjusting for gestational age. The box size of point estimate is proportional to inverse variance. IPD, individual participant data; AD, aggregated data.

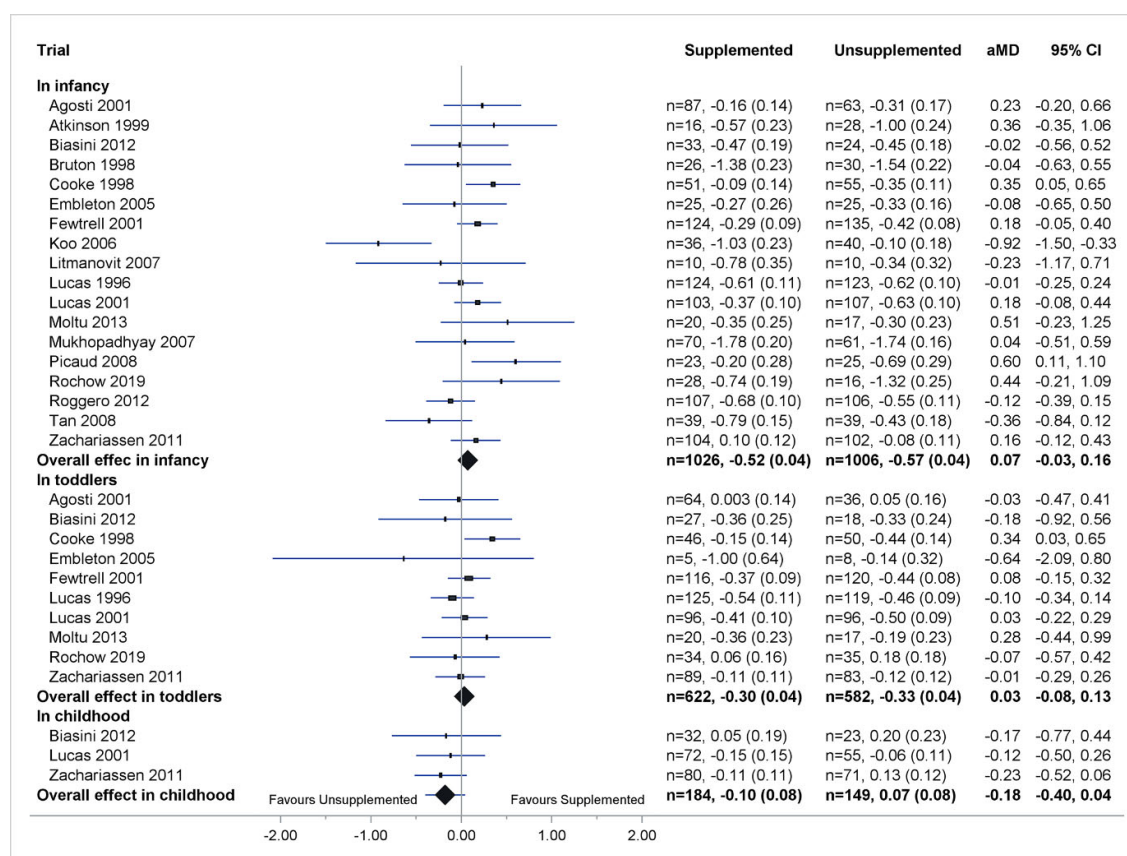

**Figure S2. IPD analysis of BMI z-scores.** Data are mean and standard error, with adjusted mean difference (aMD) for treatment effect and 95% confidence intervals (CIs) adjusting for sex, gestational age and birthweight z-scores. The box size of point estimate is proportional to inverse variance. P-value for heterogeneity in infancy = 0.36, in toddlers = 0.81, in childhood = 0.64, in adolescence = 0.005, at >3 years = 0.04.

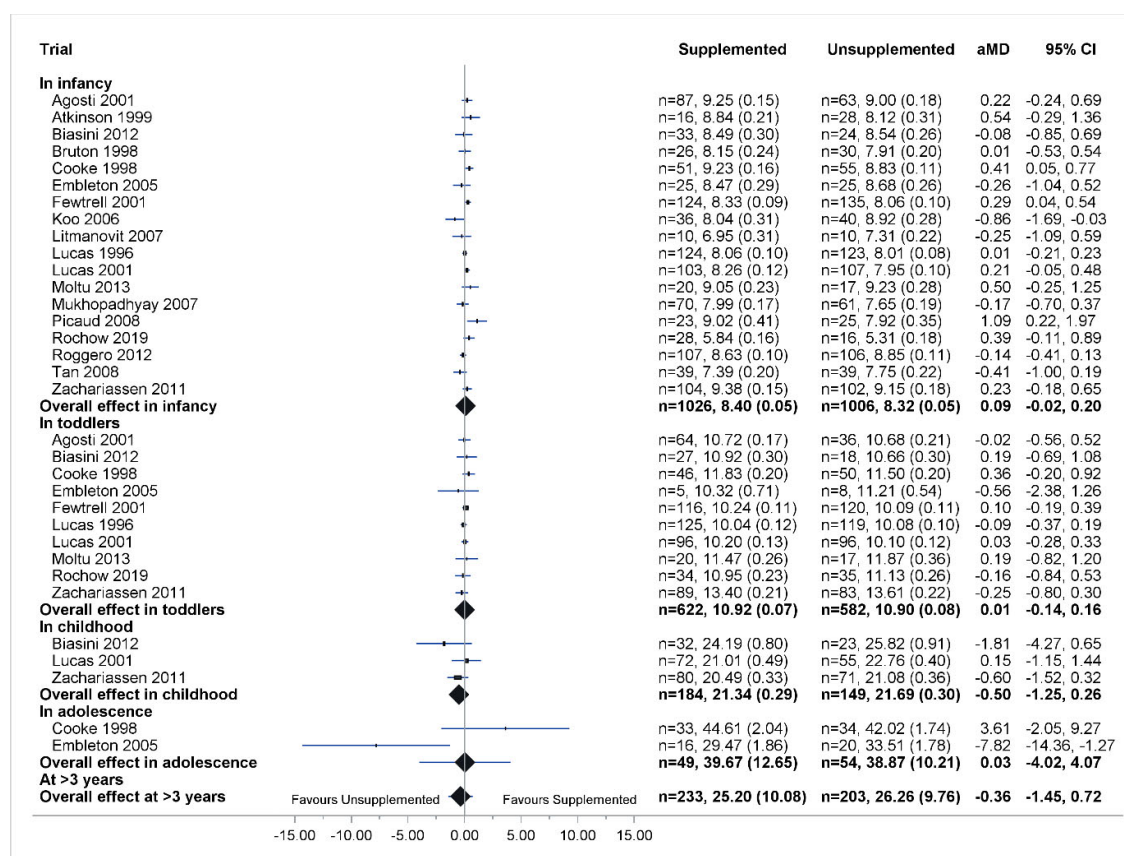

**Figure S3. IPD analysis of weight.** Data are mean and standard error, with adjusted mean difference (aMD) for treatment effect and 95% confidence intervals (CIs) adjusting for sex, gestational age, and birthweight z-scores. The box size of point estimate is proportional to inverse variance. P-value for heterogeneity in infancy = 0.003, in toddlers = 0.84, in childhood = 0.28, in adolescence = 0.07, at >3 years = 0.05.

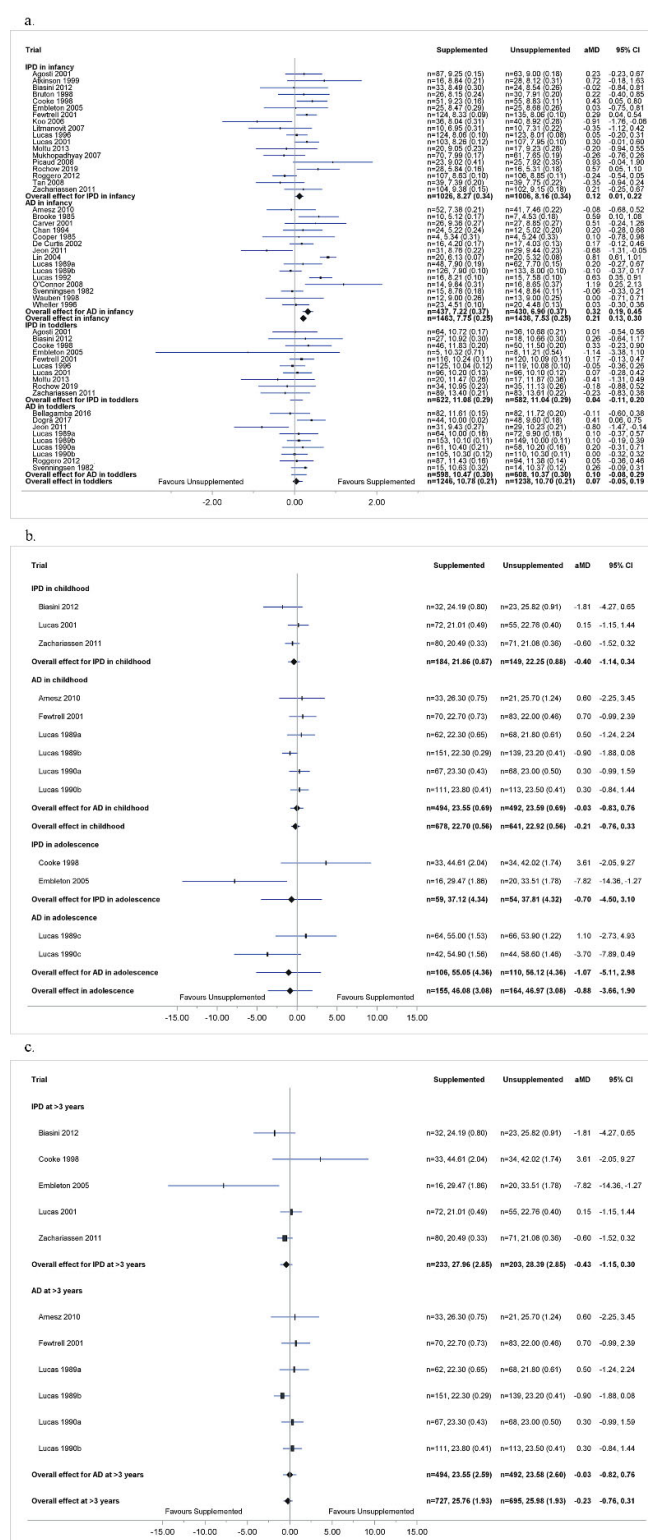

**Figure S4. Combined IPD and AD analysis of weight.** a. in infancy and in toddlers, b. in childhood and in adolescence, c. at >3 years. Data are mean and standard error, with adjusted mean difference (aMD) for treatment effect and 95% confidence intervals (CIs) adjusting for gestational age. The box size of point estimate is proportional to inverse variance. IPD, individual participant data; AD, aggregated data.



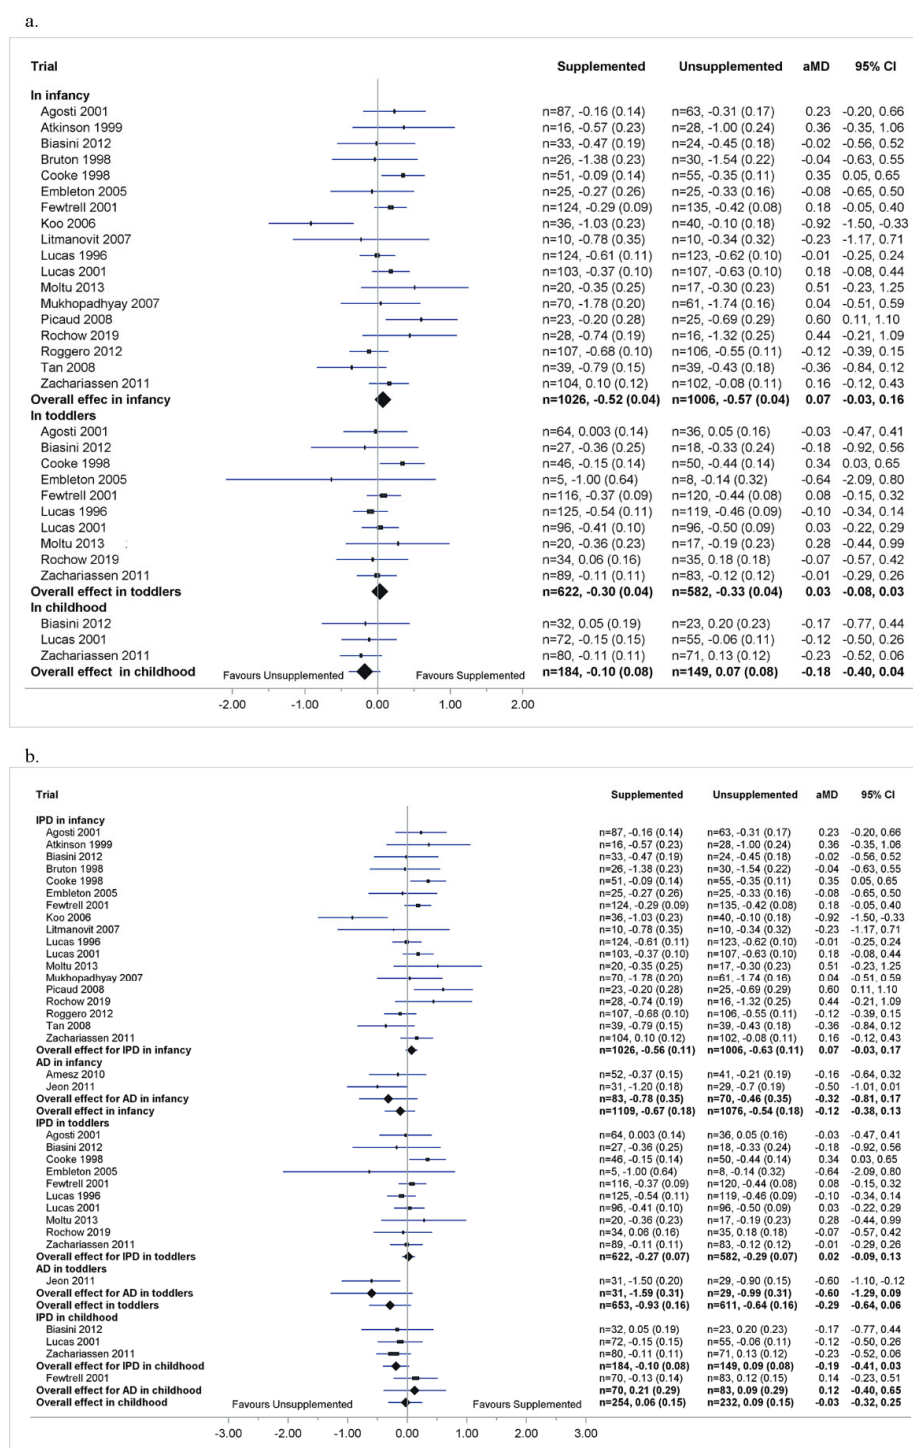

**Figure S5. Forest plot of effect of macronutrient supplementation on weight z-scores.** a. IPD analysis, b. Combined IPD and AD analysis. Data are mean and standard error, with adjusted mean difference (aMD) for treatment effect and 95% confidence intervals (CIs) adjusted for sex, gestational age and birthweight z-scores. The box size of point estimate is proportional to inverse variance. P-value for heterogeneity of IPD analysis in infancy = 0.01, in toddlers = 0.66, in childhood = 0.92. IPD, individual participant data; AD, aggregated data.

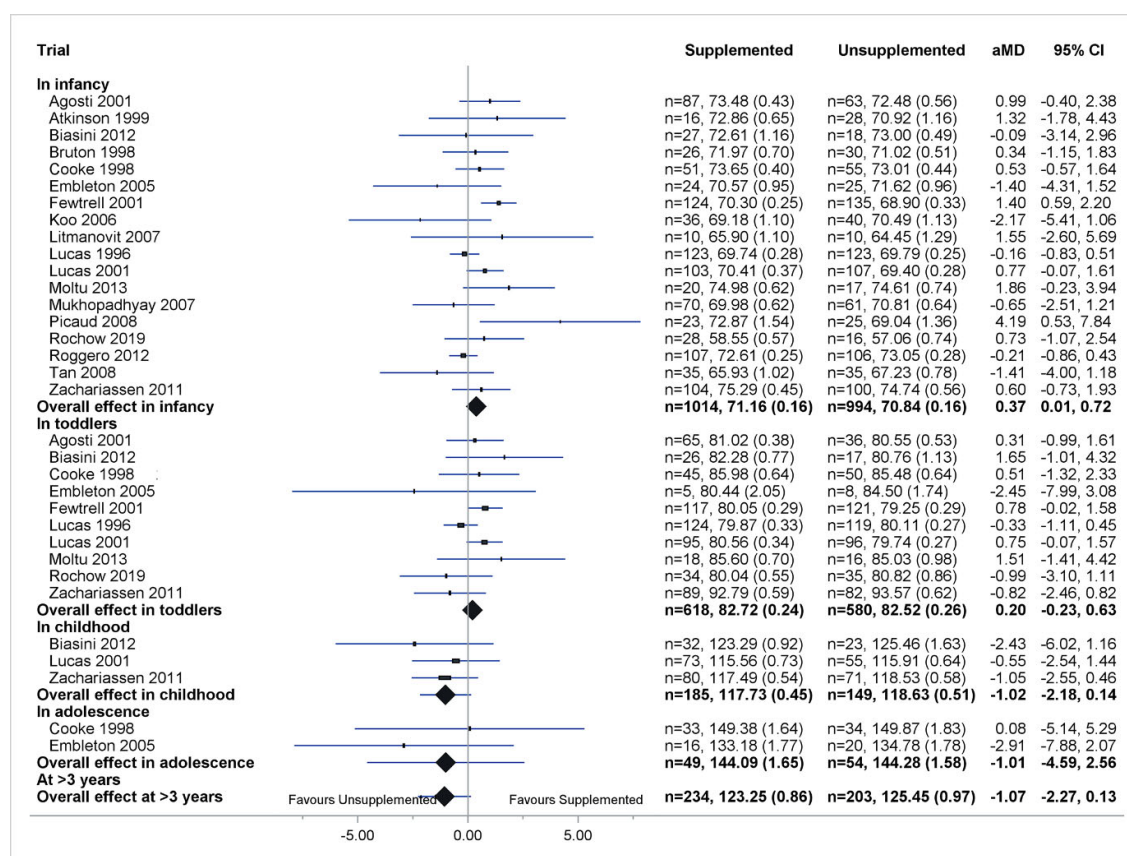

**Figure S6. IPD analysis of length/height.** Data are mean and standard error, with adjusted mean difference (aMD) for treatment effect and 95% confidence intervals (CIs) adjusted for sex, gestational age, and birthweight z-scores. The box size of point estimate is proportional to inverse variance. P-value for heterogeneity in infancy = 0.003, in toddlers = 0.12, in childhood = 0.58, in adolescence = 0.79, at >3 years = 0.90.



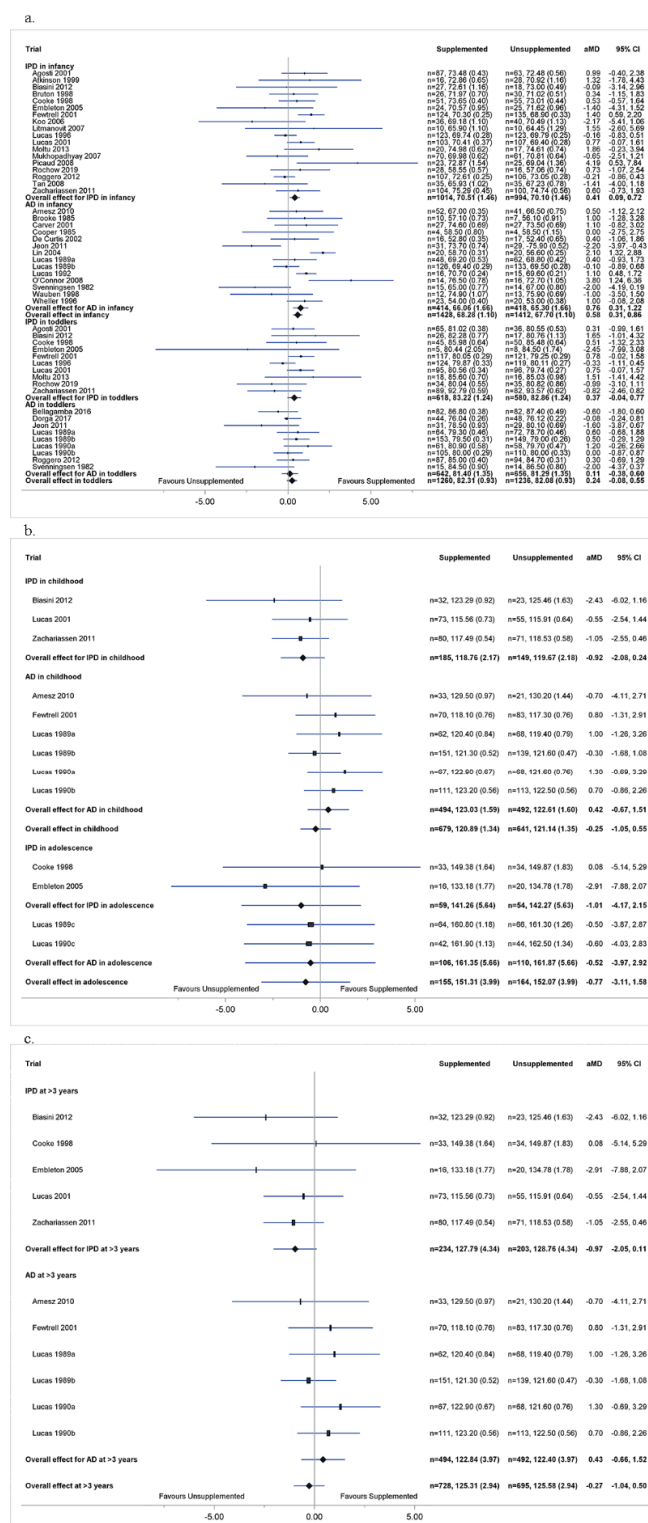

**Figure S7. Combined IPD and AD analysis of length/height.** a. in infancy and in toddlers, b. in childhood and in adolescence, c. at >3 years. Data are mean and standard error, with adjusted mean difference (aMD) for treatment effect and 95% confidence intervals (CIs) adjusting for gestational age. The box size of point estimate is proportional to inverse variance. IPD, individual participant data; AD, aggregated data.

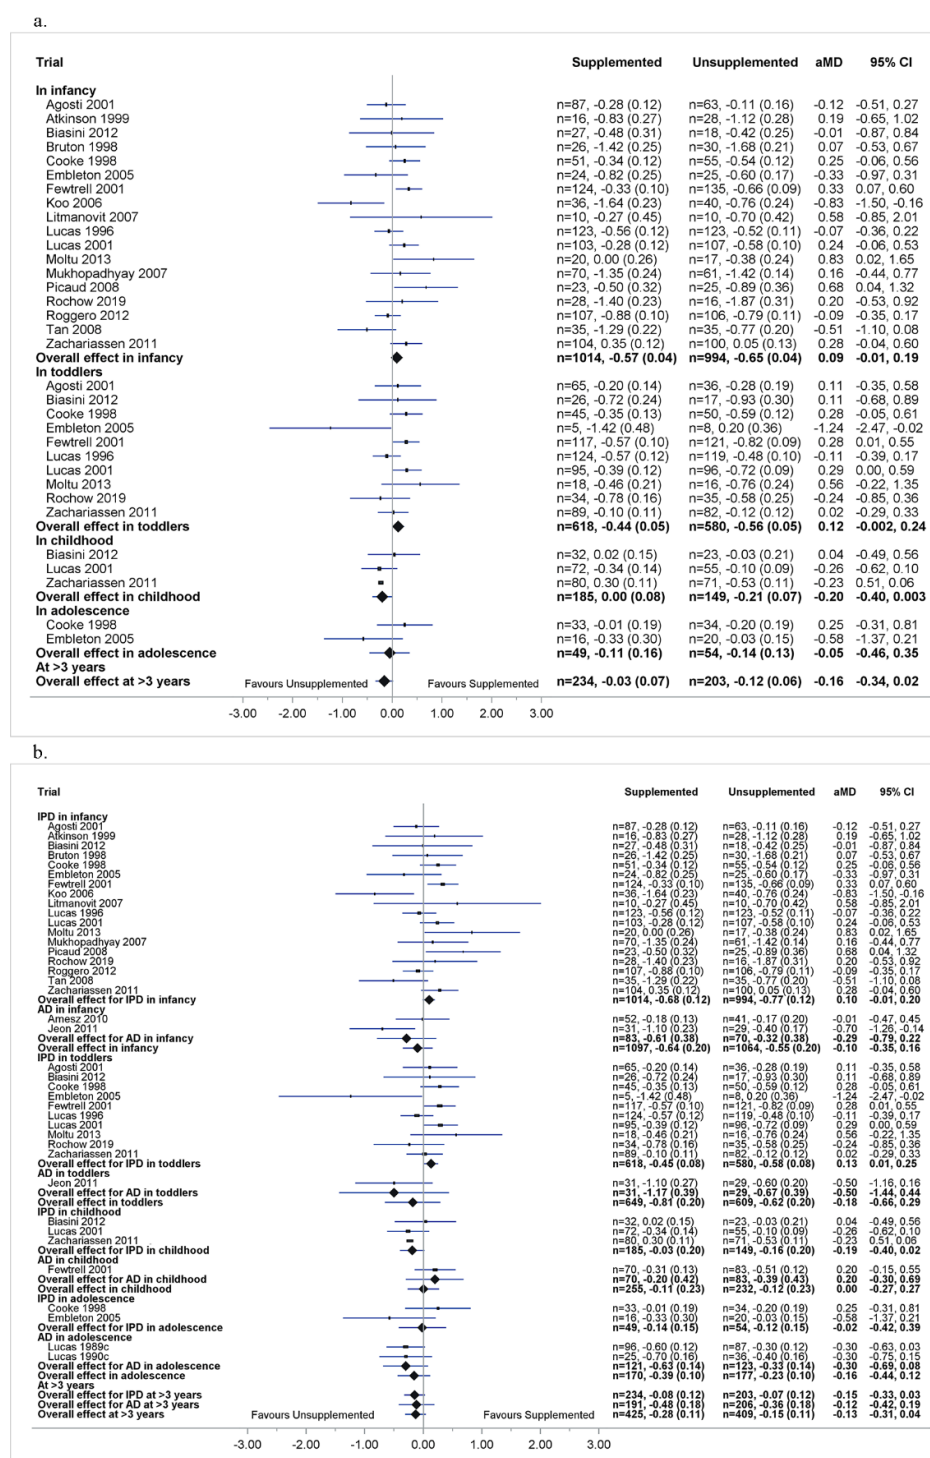

**Figure S8. Forest plot of effect of macronutrient supplementation on length/height z-scores. a.** IPD analysis, **b.** Combined IPD and AD analysis. Data are mean and standard error, with adjusted mean difference (aMD) for treatment effect and 95% confidence intervals (CIs) adjusted for sex, gestational age and birthweight z-scores. The box size of point estimate is proportional to inverse variance. P-value for heterogeneity of IPD analysis in infancy = 0.003, in toddlers = 0.04, in childhood = 0.62, in adolescence = 0.12, at >3 years = 0.50. IPD, individual participant data; AD, aggregated data.

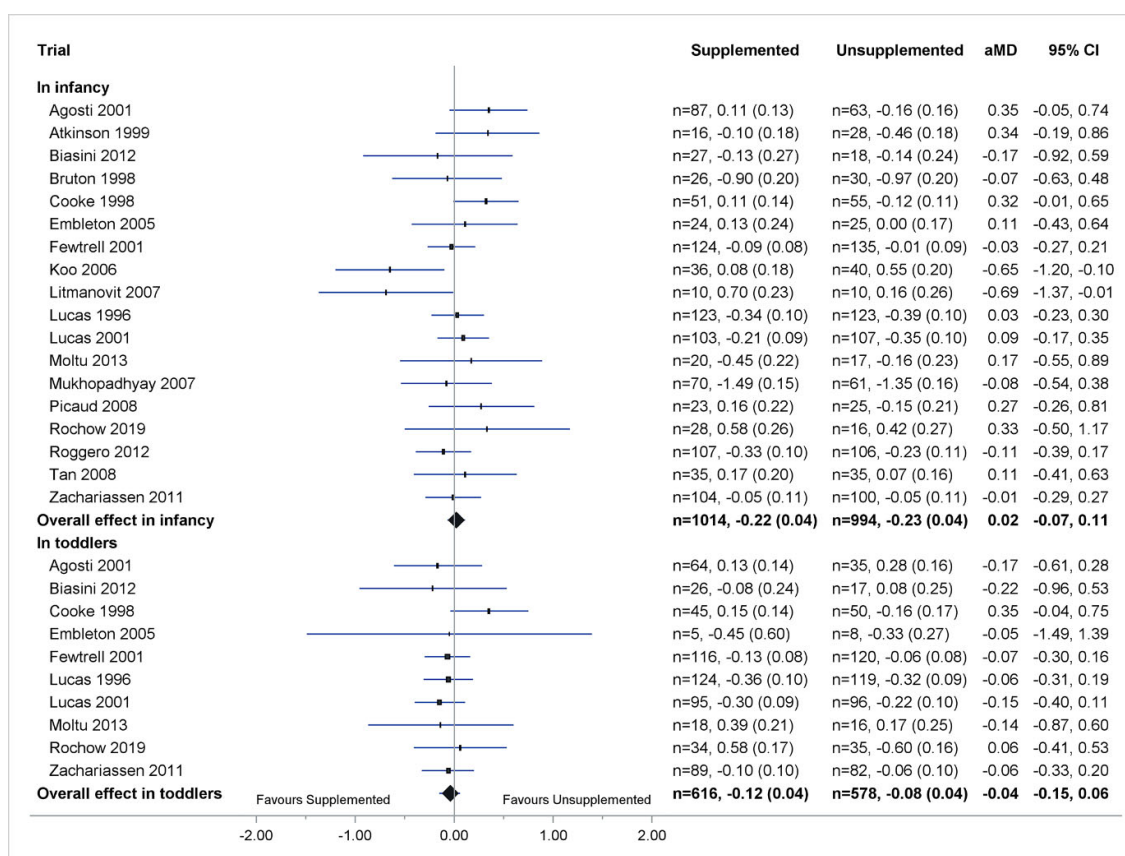

**Figure S9. IPD analysis of weight for length z-scores.** Data are mean and standard error, with adjusted mean difference (aMD) for treatment effect and 95% confidence intervals (CIs) adjusting for sex, gestational age and birthweight z-scores. The box size of point estimate is proportional to inverse variance. P-value for heterogeneity in infancy = 0.40, in toddlers = 0.83.

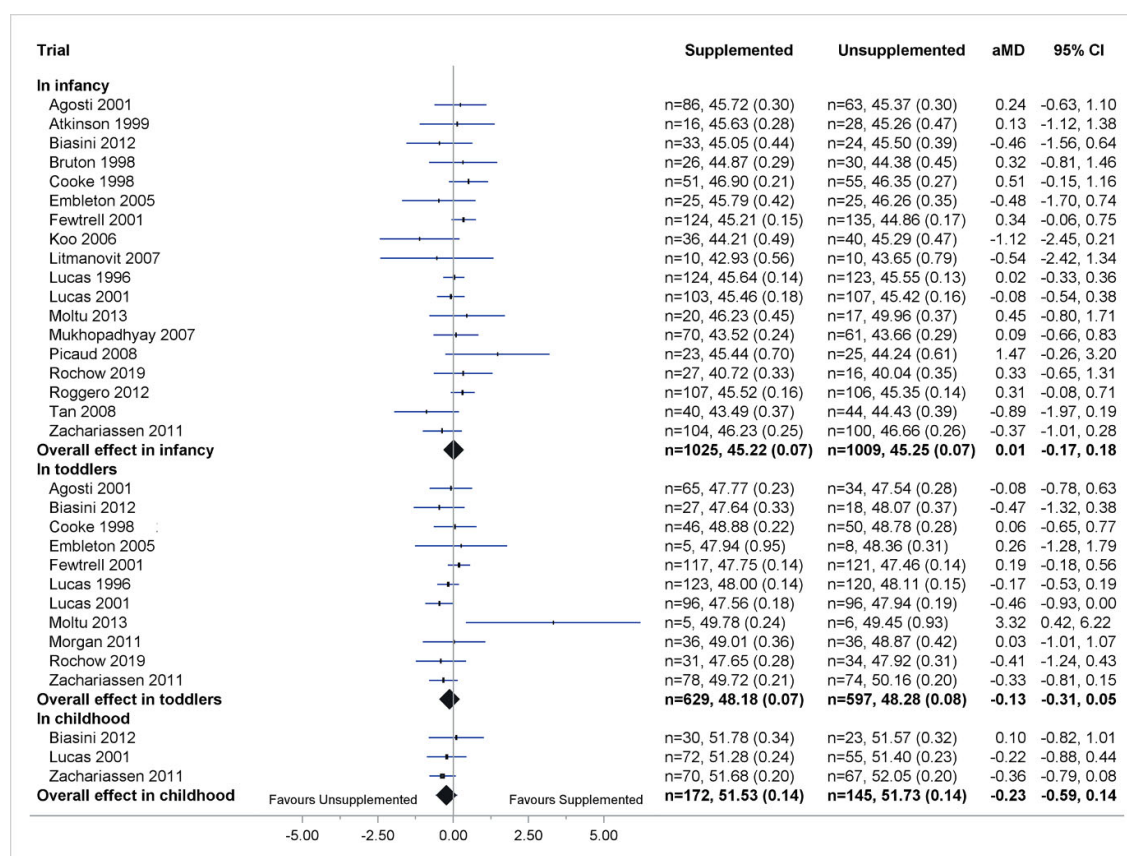

**Figure S10. IPD analysis of head circumference.** Data are mean and standard error, with adjusted mean difference (aMD) for treatment effect and 95% confidence intervals (CIs) adjusting for sex, gestational age, and birthweight z-scores. The box size of point estimate is proportional to inverse variance. P-value for heterogeneity in infancy = 0.09, in toddlers = 0.39, in childhood = 0.60.

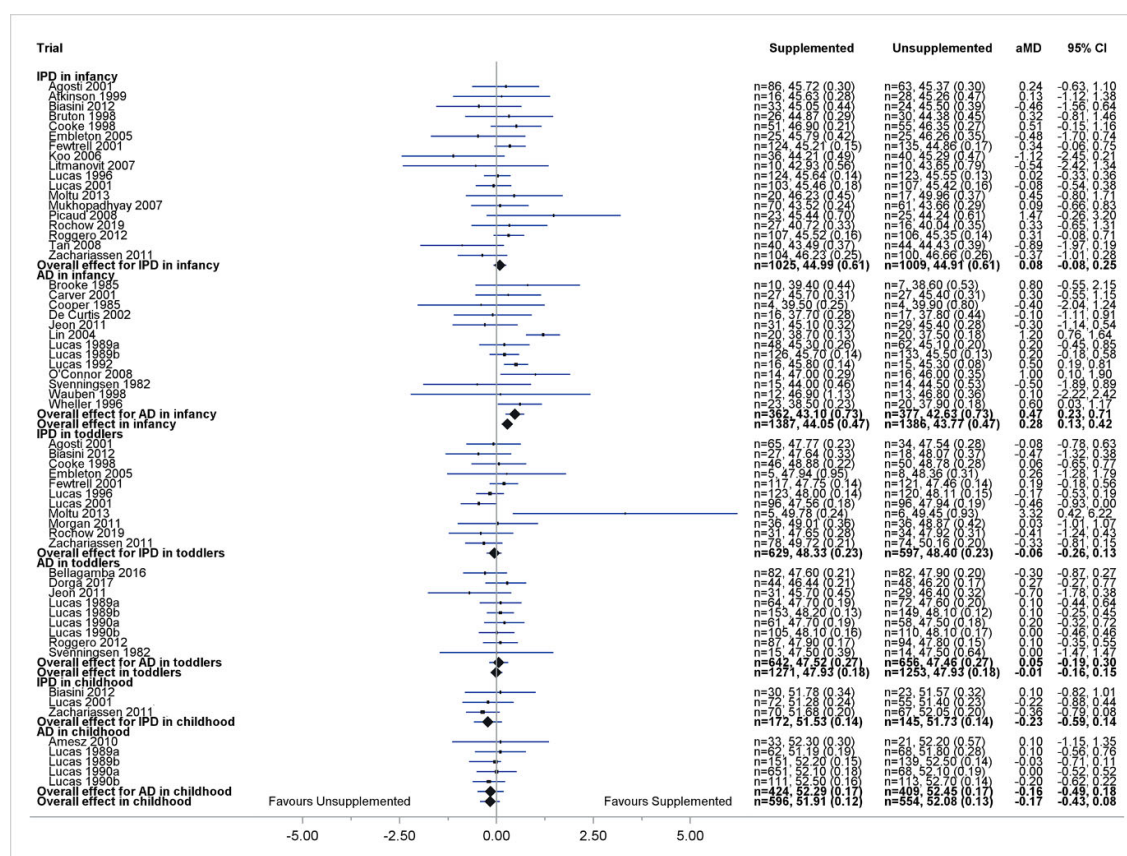

**Figure S11. Combined IPD and AD analysis of head circumference.** Data are mean and standard error, with adjusted mean difference (aMD) for treatment effect and 95% confidence intervals (CIs) adjusting for gestational age. The box size of point estimate is proportional to inverse variance. IPD, individual participant data; AD, aggregated data.



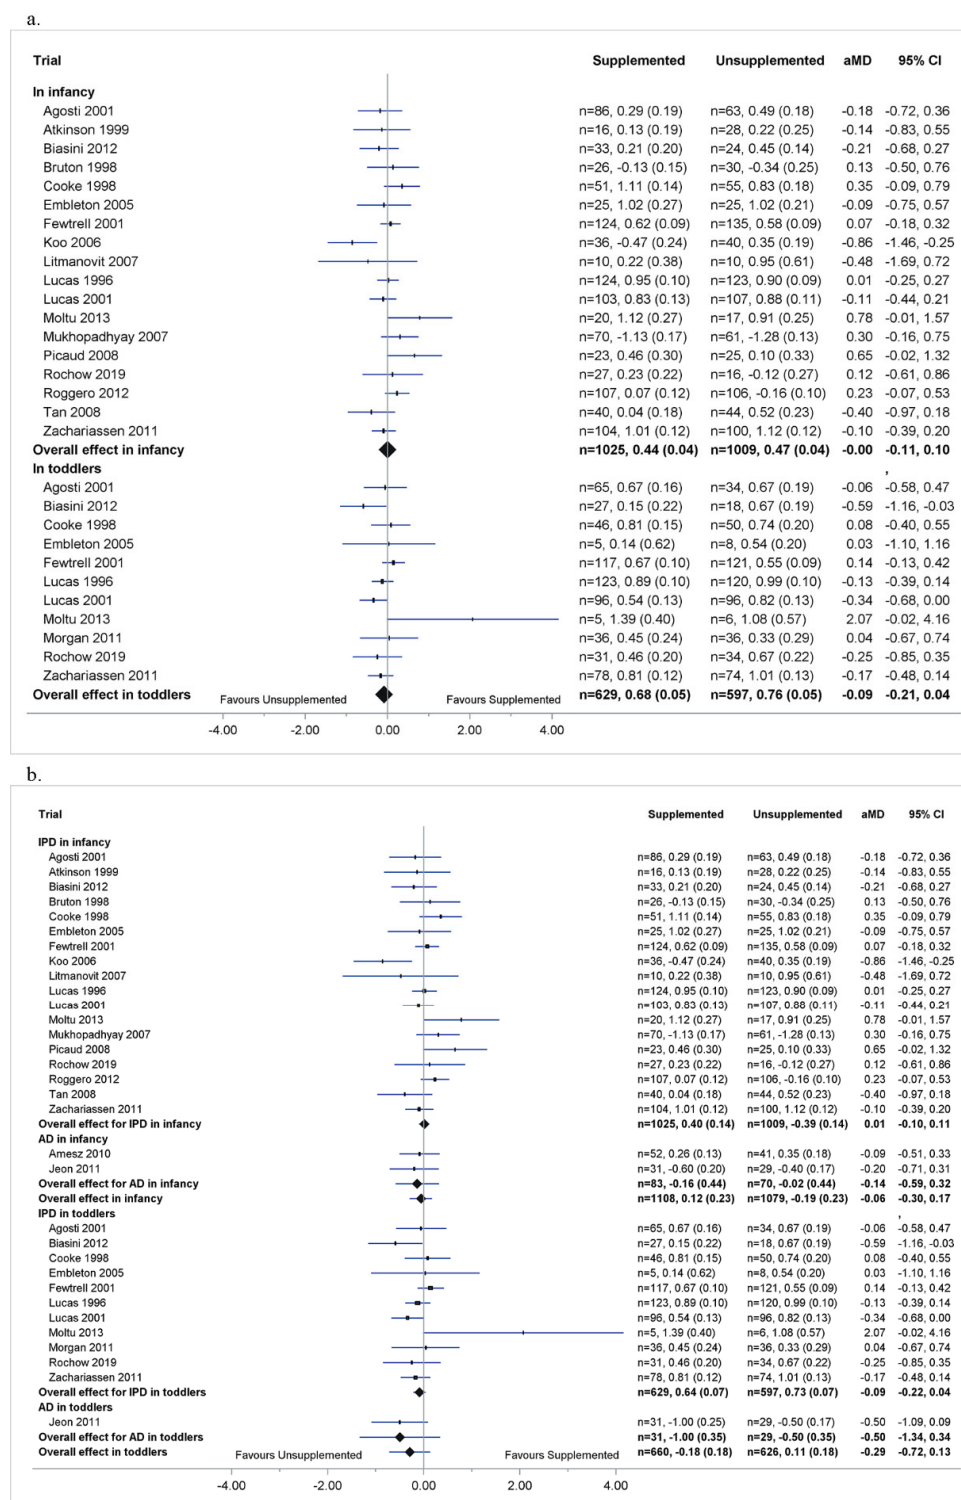

**Figure S12. Forest plot of effect of macronutrient supplementation on head circumference z-scores.** a. IPD analysis, b. Combined IPD and AD analysis. Data are mean and standard error, with adjusted mean difference (aMD) for treatment effect and 95% confidence intervals (CIs) adjusted for sex, gestational age and birthweight z-scores. The box size of point estimate is proportional to inverse variance. P-value for heterogeneity of IPD analysis in infancy = 0.10, in toddlers = 0.32. IPD, individual participant data; AD, aggregated data.

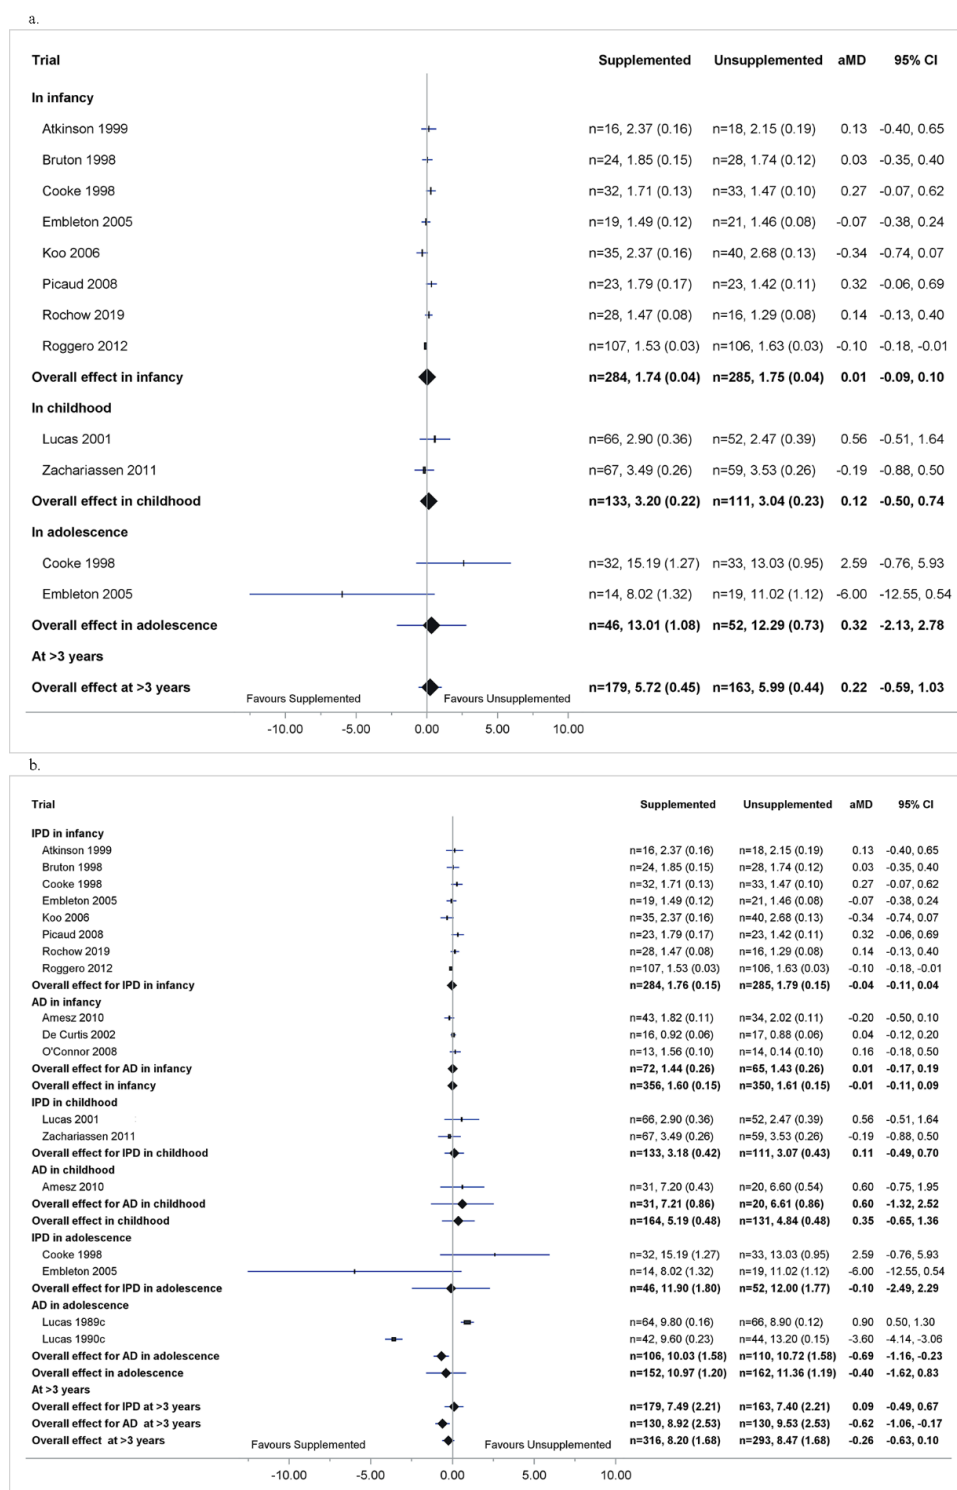

**Figure S13. Forest plot of effect of macronutrient supplementation on fat mass.** a. IPD analysis, b. Combined IPD and AD analysis. Data are mean and standard error, with adjusted mean difference (aMD) for treatment effect and 95% confidence intervals (CIs) adjusted for sex, gestational age and birthweight z-scores. The box size of point estimate is proportional to inverse variance within each age group. P-value for heterogeneity of IPD analysis in infancy = 0.03, in childhood = 0.43, in adolescence = 0.02, at >3 years = 0.02. IPD, individual participant data; AD, aggregated data.

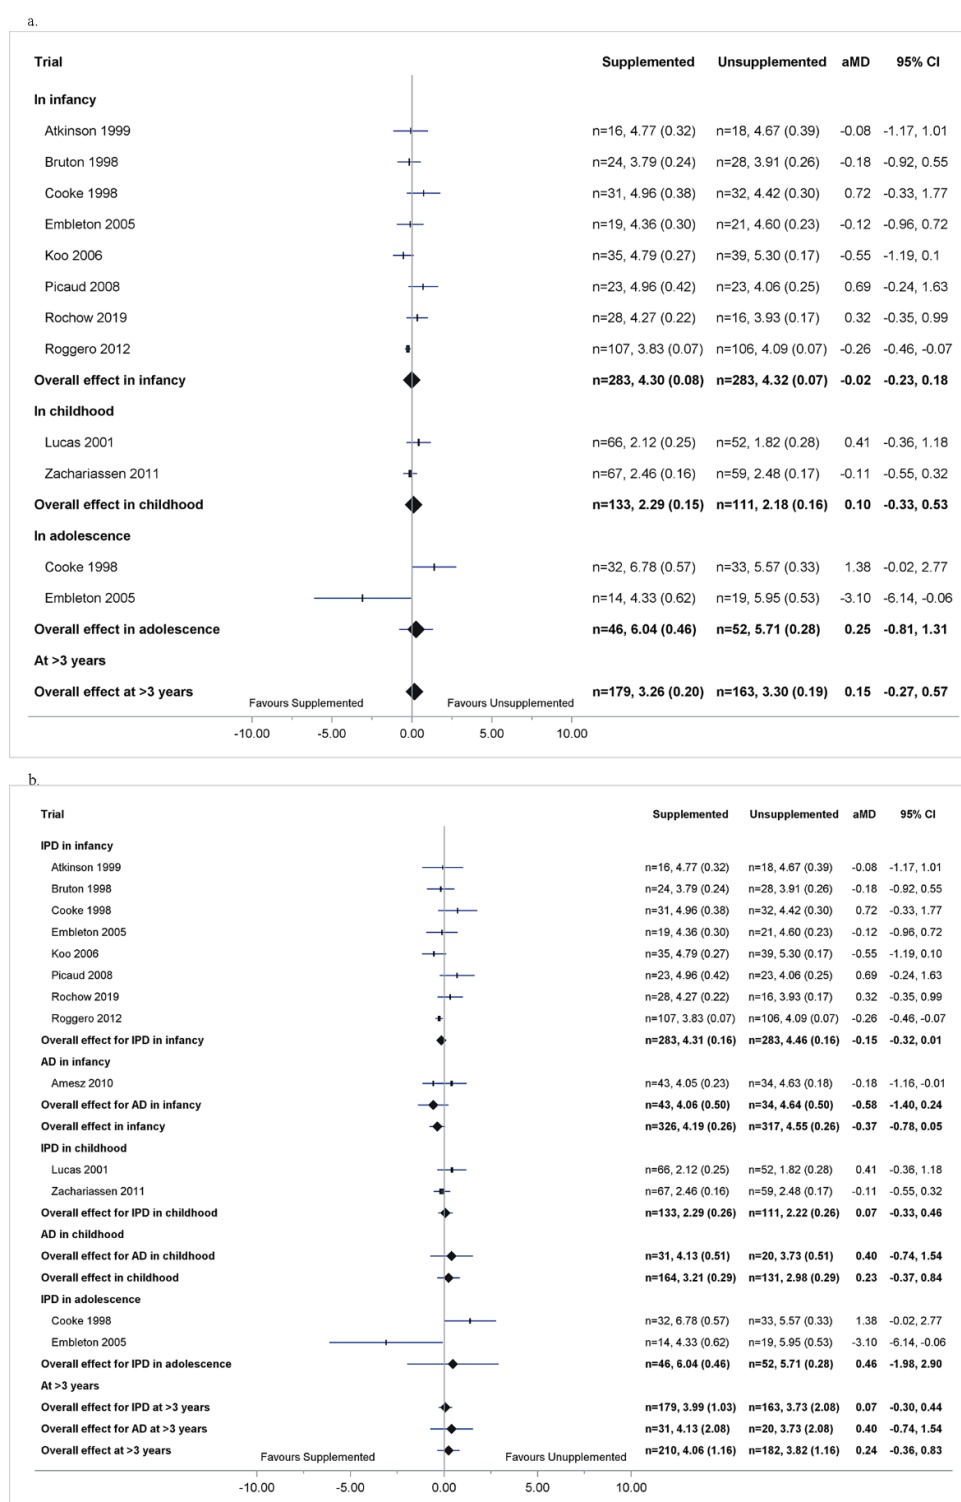

**Figure S14. Forest plot of effect of macronutrient supplementation on fat mass index.** a. IPD analysis, b. Combined IPD and AD analysis. Data are mean and standard error, with adjusted mean difference (aMD) for treatment effect and 95% confidence intervals (CIs) adjusted for sex, gestational age and birthweight z-scores. The box size of point estimate is proportional to inverse variance. P-value for heterogeneity of IPD analysis in infancy = 0.84, in childhood = 0.42, in adolescence = 0.01, at >3 years = 0.01. IPD, individual participant data; AD, aggregated data.



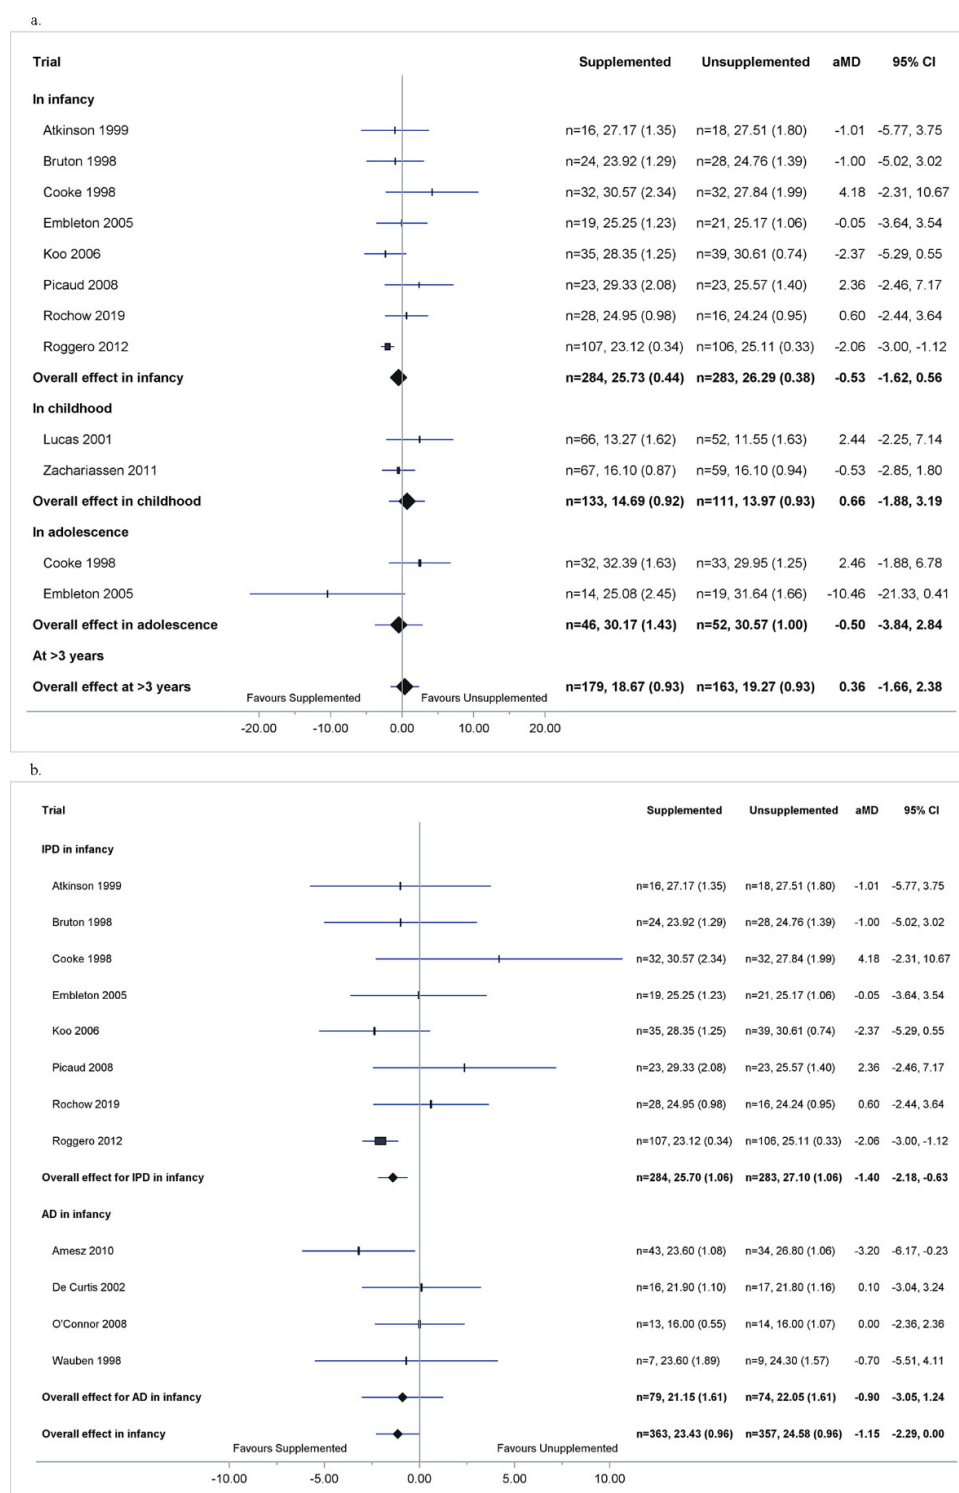

**Figure S15. Forest plot of effect of macronutrient supplementation on percent fat mass.** a. IPD analysis, b. Combined IPD and AD analysis. Data are mean and standard error, with adjusted mean difference (aMD) for treatment effect and 95% confidence intervals (CIs) adjusted for sex, gestational age and birthweight z-scores. The box size of point estimate is proportional to inverse variance within each age group. P-value for heterogeneity of IPD analysis in infancy = 0.07, in childhood = 0.43, in adolescence = 0.02, at >3 years = 0.23. IPD, individual participant data; AD, aggregated data.

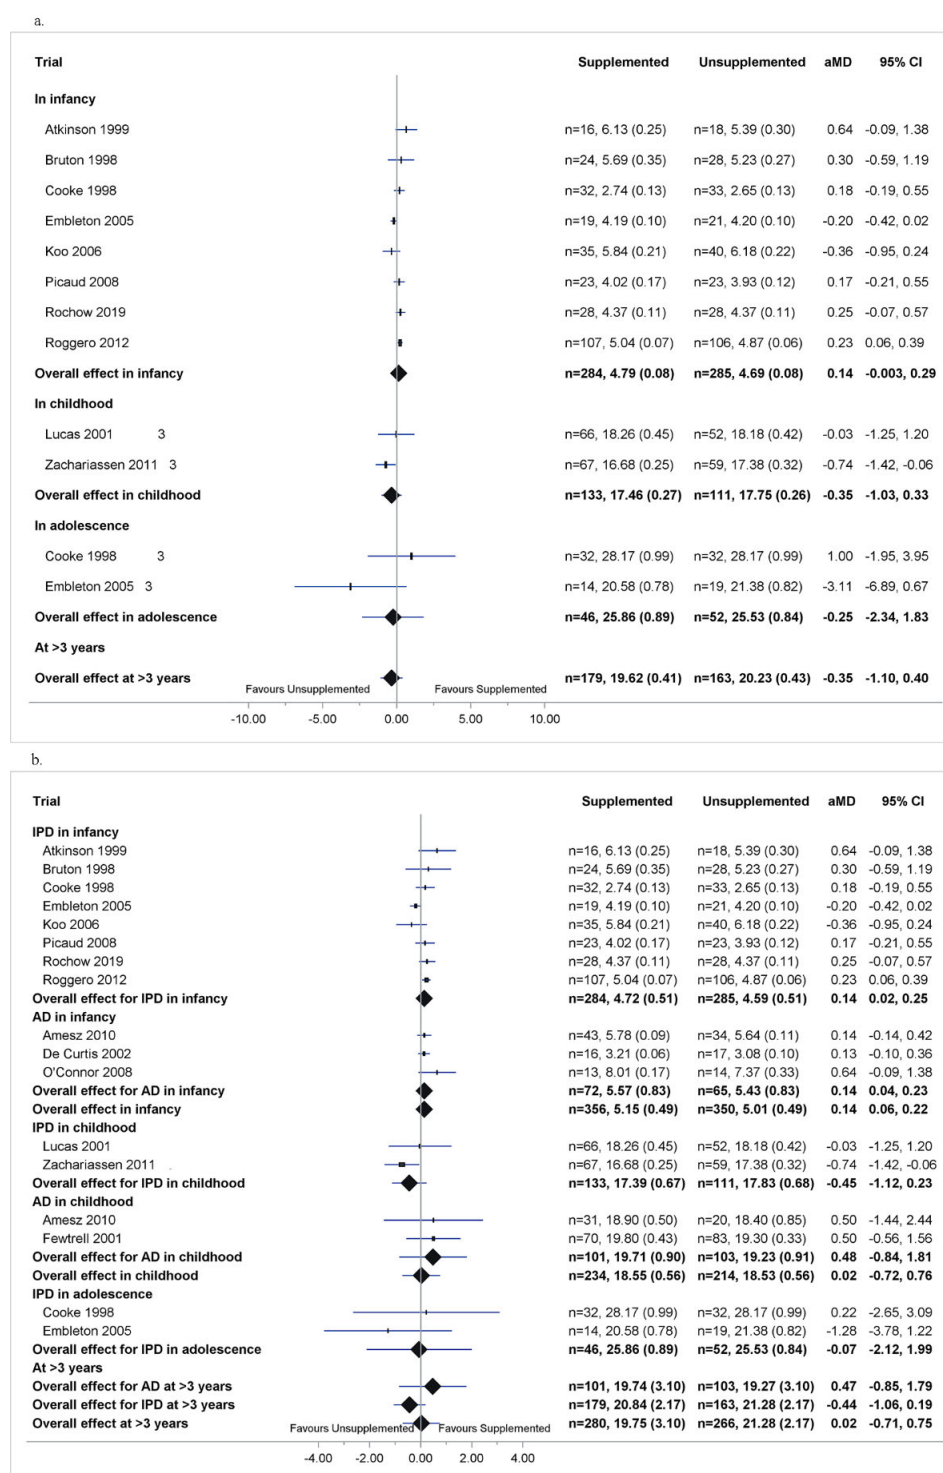

**Figure S16. Forest plot of effect of macronutrient supplementation on lean mass.** a. IPD analysis, b. Combined IPD and AD analysis. Data are mean and standard error, with adjusted mean difference (aMD) for treatment effect and 95% confidence intervals (CIs) adjusted for sex, gestational age and birthweight z-scores. The box size of point estimate is proportional to inverse variance within each age group. P-value for heterogeneity of IPD analysis in infancy = 0.12, in childhood = 0.40, in adolescence = 0.36, at >3 years = 0.632. IPD, individual participant data; AD, aggregated data.

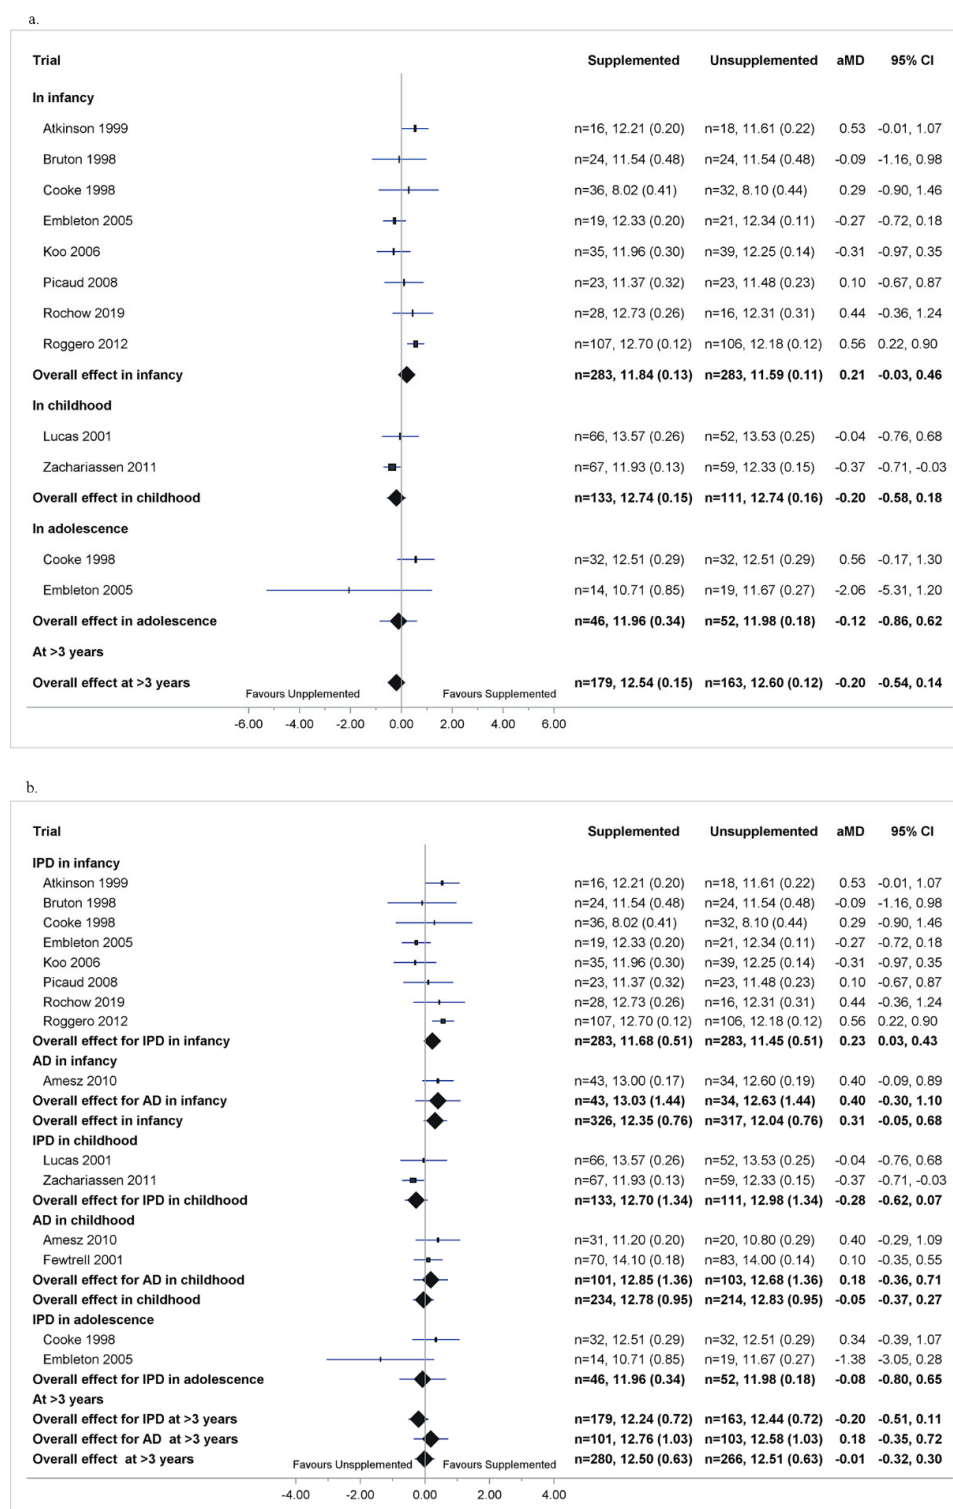

**Figure S17. Forest plot of effect of macronutrient supplementation on lean mass index.** a. IPD analysis, b. Combined IPD and AD analysis. Data are mean and standard error, with adjusted mean difference (aMD) for treatment effect and 95% confidence intervals (CIs) adjusted for sex, gestational age and birthweight z-scores. The box size of point estimate is proportional to inverse variance. P-value for heterogeneity of IPD analysis in infancy = 0.37, in childhood = 0.41, in adolescence = 0.04, at >3 years = 0.11. IPD, individual participant data; AD, aggregated data.

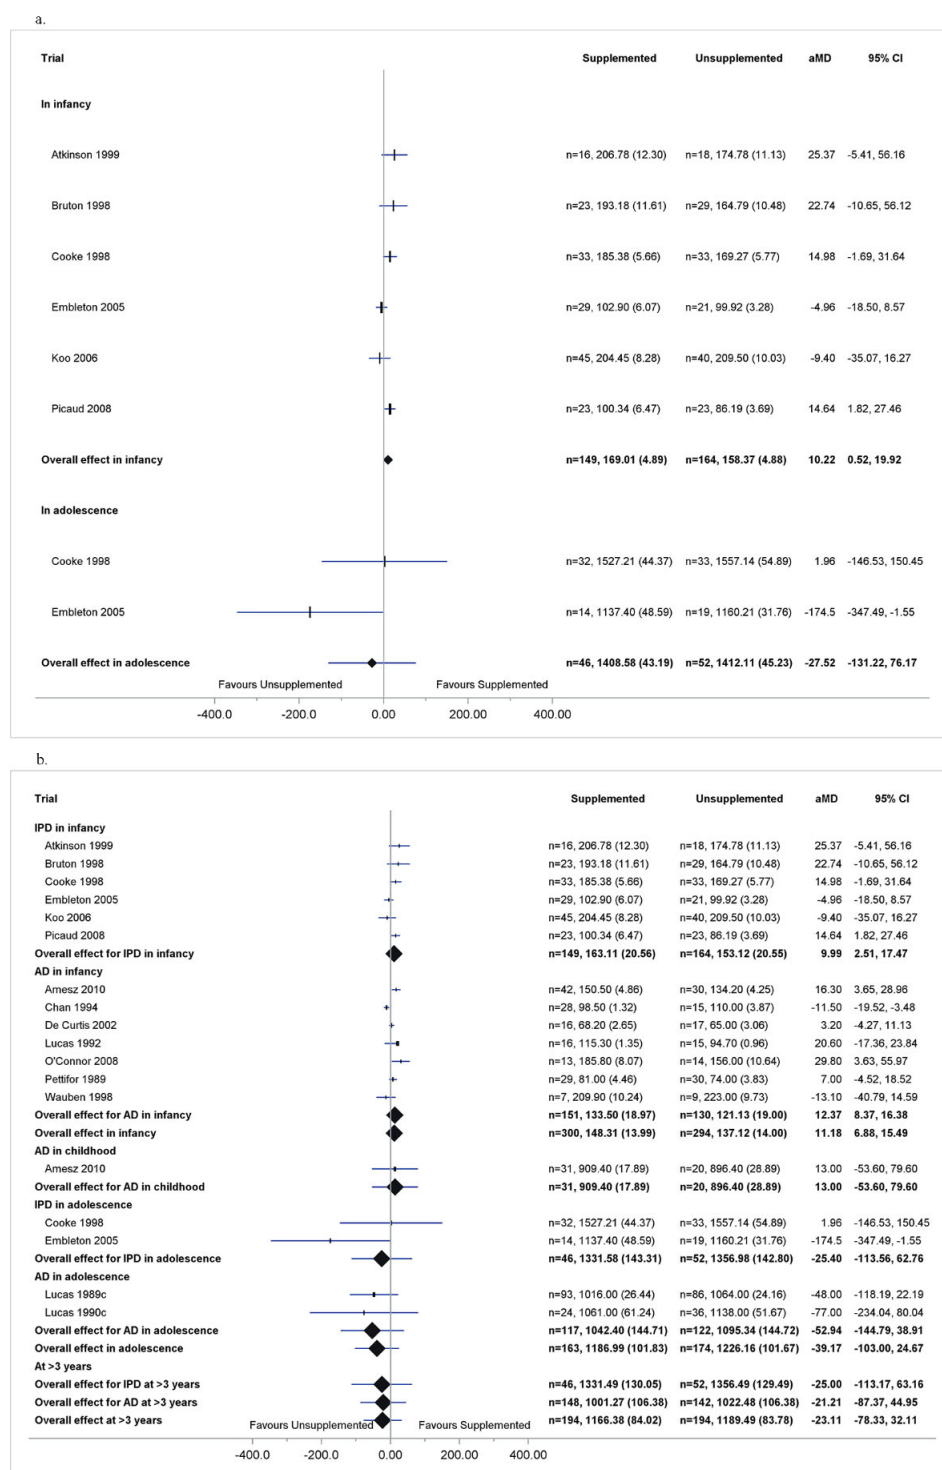

**Figure S18. Forest plot of effect of macronutrient supplementation on bone mineral content.** a. IPD analysis, b. Combined IPD and AD analysis. Data are mean and standard error, with adjusted mean difference (aMD) for treatment effect and 95% confidence intervals (CIs) adjusted for sex, gestational age and birthweight z-scores. The box size of point estimate is proportional to inverse variance within each age group. P-value for heterogeneity of IPD analysis in infancy = 0.21, in adolescence = 0.91. IPD, individual participant data; AD, aggregated data.

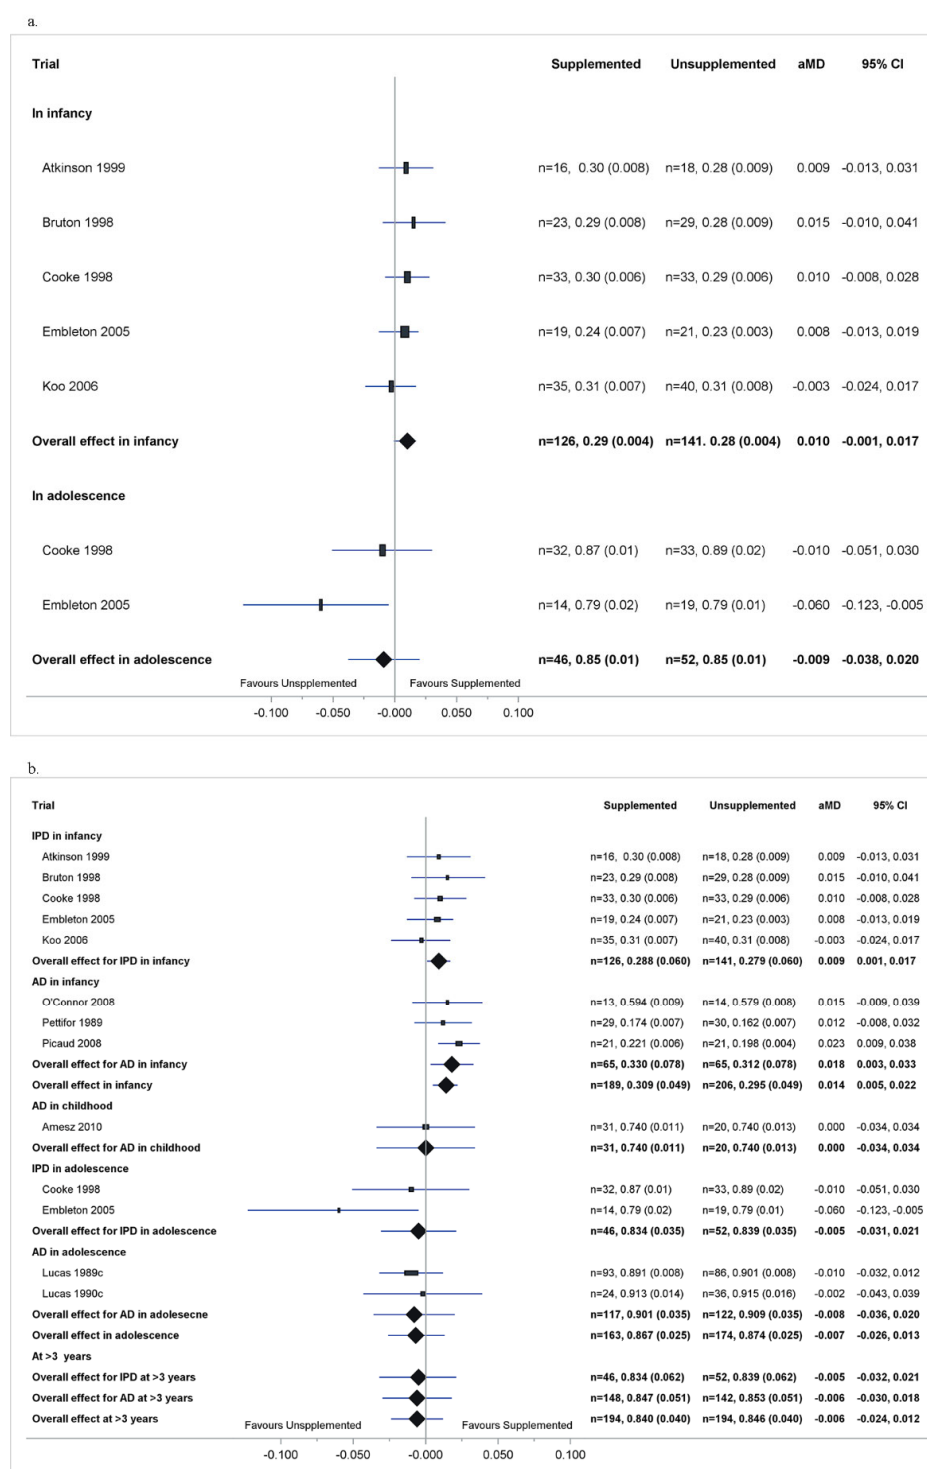

**Figure S19. Forest plot of effect of macronutrient supplementation on bone mineral density.** a. IPD analysis, b. Combined IPD and AD analysis. Data are mean and standard error, with adjusted mean difference (aMD) for treatment effect and 95% confidence intervals (CIs) adjusted for sex, gestational age and birthweight z-scores. The box size of point estimate is proportional to inverse variance within each age group. P-value for heterogeneity of IPD analysis in infancy = 0.74, in adolescence = 0.91. IPD, individual participant data; AD, aggregated data.

Table S1. Risk of bias within studies.

| Study                   | Randomisation <sup>1</sup> | Concealment <sup>2</sup> | Performance <sup>3</sup> | Detection <sup>4</sup> | Attrition <sup>5</sup> | Reporting <sup>6</sup> |
|-------------------------|----------------------------|--------------------------|--------------------------|------------------------|------------------------|------------------------|
| <b>Studies with IPD</b> |                            |                          |                          |                        |                        |                        |
| Agosti 2003             | Unclear                    | Unclear                  | Low                      | Low                    | Low                    | Low                    |
| Atkinson 1999           | Low                        | Low                      | Low                      | Low                    | Low                    | Low                    |
| Biasini 2012            | High                       | High                     | High                     | Low                    | Low                    | Low                    |
| Brunton 1998            | Low                        | Low                      | Low                      | High                   | Low                    | Low                    |
| Cooke 1998              | Low                        | Low                      | Low                      | Low                    | Low                    | Low                    |
| Embleton 2005           | Low                        | Low                      | Low                      | Low                    | High                   | Low                    |
| Fewtrell 2001           | Low                        | Low                      | Low                      | Low                    | Low                    | Low                    |
| Koo 2006                | Low                        | Low                      | Low                      | Low                    | Low                    | Low                    |
| Litmanovitz 2007        | High                       | High                     | Low                      | Low                    | Low                    | Low                    |
| Lucas 1996              | Low                        | Low                      | High                     | Low                    | Low                    | Low                    |
| Lucas 2001              | Low                        | Low                      | Low                      | Low                    | Low                    | Low                    |
| Moltu 2013              | Low                        | Low                      | High                     | High                   | Low                    | Low                    |
| Morgan 201              | Low                        | Low                      | Low                      | Low                    | Unclear                | Low                    |
| Mukhopadhyay 2007       | Low                        | Low                      | Unclear                  | Unclear                | Low                    | Low                    |
| Picaud 2008             | Low                        | Low                      | Low                      | Low                    | Low                    | Low                    |
| Rochow 2019             | Low                        | Low                      | Low                      | Low                    | Low                    | Low                    |
| Roggero 2012            | Low                        | Low                      | High                     | Low                    | Low                    | Low                    |
| Tan 2008                | Low                        | Low                      | High                     | High                   | Low                    | Low                    |
| Zachariassen 2001       | Low                        | Low                      | High                     | High                   | Low                    | Low                    |
| <b>Studies with AD</b>  |                            |                          |                          |                        |                        |                        |
| Amesz 2010              | Low                        | Low                      | Low                      | Unclear                | High                   | Low                    |
| Bellagamba 2016         | Low                        | Unclear                  | Low                      | Low                    | Unclear                | Low                    |
| Brooke 1985             | Unclear                    | Unclear                  | Low                      | Unclear                | Low                    | Low                    |
| Carver 2001             | Low                        | Unclear                  | Unclear                  | Unclear                | High                   | Unclear                |
| Chan 1994               | Unclear                    | Unclear                  | Unclear                  | Unclear                | Low                    | Low                    |
| Cooper 1985             | Unclear                    | Unclear                  | Unclear                  | Unclear                | Low                    | High                   |
| De Curtis 2002          | Unclear                    | Unclear                  | Unclear                  | Unclear                | Low                    | Low                    |
| Dogra 2017              | Low                        | Low                      | Low                      | Low                    | High                   | Low                    |
| Jeon 2011               | Unclear                    | Unclear                  | Unclear                  | Unclear                | High                   | Unclear                |
| Lin 2004                | Unclear                    | Unclear                  | Unclear                  | Unclear                | Low                    | Low                    |
| Lucas 1989              | Low                        | Low                      | High                     | Low                    | High                   | Low                    |
| Lucas 1990              | Low                        | Low                      | High                     | Low                    | High                   | Low                    |
| Lucas 1992              | Unclear                    | Unclear                  | Unclear                  | Unclear                | Low                    | Low                    |
| O'Connor 2008           | Low                        | Low                      | Unclear                  | Unclear                | High                   | Low                    |
| Svenningsen 1982        | Unclear                    | Unclear                  | Unclear                  | Unclear                | Low                    | High                   |
| Wauben 1998             | Low                        | Unclear                  | High                     | High                   | High                   | Low                    |
| Wheeler 1996            | Low                        | Unclear                  | Unclear                  | Unclear                | Low                    | Low                    |

| Study                                                                                                                                                                                                                                                                                                                                                                                                                                               | Randomisation <sup>1</sup> | Concealment <sup>2</sup> | Performance <sup>3</sup> | Detection <sup>4</sup> | Attrition <sup>5</sup> | Reporting <sup>6</sup> |
|-----------------------------------------------------------------------------------------------------------------------------------------------------------------------------------------------------------------------------------------------------------------------------------------------------------------------------------------------------------------------------------------------------------------------------------------------------|----------------------------|--------------------------|--------------------------|------------------------|------------------------|------------------------|
| <sup>1</sup> Random sequence generation. <sup>2</sup> Allocation concealment. <sup>3</sup> Blinding of participants and personnel. <sup>4</sup> Blinding of outcome assessment.<br><sup>5</sup> Incomplete outcome data. <sup>6</sup> Selective reporting.<br>We used IPD not the published data for studies with IPD, so the risk of reporting bias is low for all the studies with IPD.<br>IPD: individual participant data; AD: aggregated data. |                            |                          |                          |                        |                        |                        |

Table S2. Subgroup analyses of infant sex.

| Outcome                     | Subgroup | No. of trials | No. of participants | aMD (95% CI)        | P for overall effect | P for heterogeneity | P for subgroup interaction |
|-----------------------------|----------|---------------|---------------------|---------------------|----------------------|---------------------|----------------------------|
| BMI                         |          |               |                     |                     |                      |                     |                            |
| BMI in childhood (kg/m²)    | Boys     | 3 trials      | 155                 | -0.32 (-0.85, 0.21) | 0.23                 | 0.17                | 0.25                       |
|                             | Girls    | 3 trials      | 178                 | 0.10 (-0.39, 0.59)  | 0.70                 | 0.74                |                            |
| BMI in infancy (kg/m²)      | Boys     | 18 trials     | 1036                | 0.09 (-0.09, 0.27)  | 0.32                 | 0.18                | 0.36                       |
|                             | Girls    | 18 trials     | 972                 | -0.03 (-0.21, 0.15) | 0.75                 | 0.76                |                            |
| BMI in toddlers (kg/m²)     | Boys     | 10 trials     | 592                 | -0.10 (-0.30, 0.11) | 0.35                 | 0.09                | 0.72                       |
|                             | Girls    | 10 trials     | 602                 | -0.05 (-0.25, 0.16) | 0.66                 | 0.67                |                            |
| BMI in adolescence (kg/m²)  | Boys     | 2 trials      | 50                  | 0.45 (-1.59, 2.48)  | 0.66                 | 0.08                | 0.68                       |
|                             | Girls    | 2 trials      | 53                  | -0.15 (-2.13, 1.83) | 0.88                 | 0.06                |                            |
| BMI at >3 years (kg/m²)     | Boys     | 5 trials      | 205                 | -0.12 (-0.74, 0.50) | 0.71                 | 0.01                | 0.73                       |
|                             | Girls    | 5 trials      | 231                 | 0.03 (-0.55, 0.61)  | 0.92                 | 0.16                |                            |
| BMI z-scores in infancy     | Boys     | 18 trials     | 1036                | 0.07 (-0.06, 0.20)  | 0.29                 | 0.18                | 0.30                       |
|                             | Girls    | 18 trials     | 972                 | -0.03 (-0.16, 0.10) | 0.67                 | 0.76                |                            |
| BMI z-scores in toddlers    | Boys     | 10 trials     | 592                 | -0.10 (-0.25, 0.05) | 0.20                 | 0.66                | 0.63                       |
|                             | Girls    | 10 trials     | 602                 | -0.05 (-0.20, 0.11) | 0.54                 | 0.09                |                            |
| BMI z-scores in childhood   | Boys     | 3 trials      | 155                 | -0.25 (-0.58, 0.09) | 0.15                 | 0.28                | 0.21                       |
|                             | Girls    | 3 trials      | 178                 | 0.05 (-0.27, 0.36)  | 0.77                 | 0.82                |                            |
| BMI z-scores in adolescence | Boys     | 2 trials      | 50                  | 0.01 (-0.74, 0.75)  | 0.99                 | 0.10                | 0.76                       |
|                             | Girls    | 2 trials      | 53                  | -0.16 (-0.88, 0.56) | 0.66                 | 0.02                |                            |
| BMI z-scores at >3 years    | Boys     | 5 trials      | 205                 | -0.18 (-0.49, 0.13) | 0.26                 | 0.09                | 0.42                       |
|                             | Girls    | 5 trials      | 231                 | -0.01 (-0.29, 0.29) | 0.98                 | 0.24                |                            |
| Weight                      |          |               |                     |                     |                      |                     |                            |
| Weight in infancy (kg)      | Boys     | 18 trials     | 1043                | 0.12 (-0.03, 0.26)  | 0.13                 | 0.01                | 0.63                       |
|                             | Girls    | 18 trials     | 989                 | 0.06 (-0.09, 0.22)  | 0.42                 | 0.06                |                            |
| Weight in toddlers (kg)     | Boys     | 10 trials     | 599                 | -0.01 (-0.22, 0.20) | 0.94                 | 0.28                | 0.86                       |
|                             | Girls    | 10 trials     | 605                 | 0.02 (-0.19, 0.23)  | 0.85                 | 0.53                |                            |
| Weight in childhood (kg)    | Boys     | 3 trials      | 155                 | -0.88 (-1.98, 0.23) | 0.12                 | 0.20                | 0.32                       |
|                             | Girls    | 3 trials      | 178                 | -0.12 (-1.15, 0.91) | 0.82                 | 0.58                |                            |
|                             | Boys     | 2 trials      | 50                  | 0.69 (-5.09, 6.48)  | 0.81                 | 0.12                | 0.74                       |

| Outcome                               | Subgroup | No. of trials | No. of participants | aMD (95% CI)        | P for overall effect | P for heterogeneity | P for subgroup interaction |
|---------------------------------------|----------|---------------|---------------------|---------------------|----------------------|---------------------|----------------------------|
| Weight in adolescence (kg)            | Girls    | 2 trials      | 53                  | -0.64 (-6.28, 5.01) | 0.82                 | 0.38                |                            |
| Weight at >3 years (kg)               | Boys     | 5 trials      | 205                 | -0.50 (-2.09, 1.08) | 0.53                 | 0.04                | 0.80                       |
|                                       | Girls    | 5 trials      | 231                 | -0.22 (-1.71, 1.26) | 0.77                 | 0.46                |                            |
| Weight z-scores in infancy            | Boys     | 18 trials     | 1043                | 0.11 (-0.02, 0.23)  | 0.11                 | 0.006               | 0.44                       |
|                                       | Girls    | 18 trials     | 989                 | 0.03 (-0.10, 0.17)  | 0.63                 | 0.12                |                            |
| Weight z-scores in toddlers           | Boys     | 10 trials     | 599                 | 0.06 (-0.09, 0.22)  | 0.41                 | 0.25                | 0.47                       |
|                                       | Girls    | 10 trials     | 605                 | -0.01 (-0.17, 0.14) | 0.86                 | 0.10                |                            |
| Weight z-scores in childhood          | Boys     | 3 trials      | 155                 | -0.88 (0.198, 0.23) | 0.12                 | 0.47                | 0.44                       |
|                                       | Girls    | 3 trials      | 178                 | -0.12 (-1.15, 0.91) | 0.82                 | 0.74                |                            |
| Length/height                         |          |               |                     |                     |                      |                     |                            |
| Length in infancy (cm)                | Boys     | 18 trials     | 1036                | 0.28 (-0.21, 0.77)  | 0.26                 | 0.07                | 0.64                       |
|                                       | Girls    | 18 trials     | 972                 | 0.45 (-0.06, 0.95)  | 0.08                 | 0.04                |                            |
| Height in toddlers (cm)               | Boys     | 10 trials     | 595                 | 0.24 (-0.37, 0.84)  | 0.44                 | 0.41                | 0.87                       |
|                                       | Girls    | 10 trials     | 603                 | 0.16 (-0.44, 0.76)  | 0.59                 | 0.25                |                            |
| Height in childhood (cm)              | Boys     | 3 trials      | 156                 | -1.25 (-2.94, 0.45) | 0.15                 | 0.75                | 0.70                       |
|                                       | Girls    | 3 trials      | 178                 | -0.80 (-2.38, 0.78) | 0.32                 | 0.73                |                            |
| Height in adolescence (cm)            | Boys     | 2 trials      | 50                  | -1.62 (-6.73, 3.49) | 0.53                 | 0.87                | 0.74                       |
|                                       | Girls    | 2 trials      | 53                  | -0.41 (-5.39, 4.58) | 0.87                 | 0.76                |                            |
| Height at >3 years (cm)               | Boys     | 5 trials      | 206                 | -1.45 (-3.19, 0.30) | 0.10                 | 0.93                | 0.54                       |
|                                       | Girls    | 5 trials      | 231                 | -0.70 (-2.35, 0.95) | 0.40                 | 0.94                |                            |
| Length z-scores in infancy            | Boys     | 18 trials     | 1036                | 0.09 (-0.05, 0.24)  | 0.21                 | 0.01                | 0.98                       |
|                                       | Girls    | 18 trials     | 972                 | 0.09 (-0.06, 0.24)  | 0.24                 | 0.12                |                            |
| Height z-scores in toddlers           | Boys     | 10 trials     | 595                 | 0.20 (0.02, 0.37)   | 0.03                 | 0.21                | 0.21                       |
|                                       | Girls    | 10 trials     | 603                 | 0.04 (-0.13, 0.21)  | 0.64                 | 0.05                |                            |
| Height z-scores in childhood          | Boys     | 3 trials      | 156                 | -0.21 (-0.51, 0.08) | 0.16                 | 0.65                | 0.91                       |
|                                       | Girls    | 3 trials      | 178                 | -0.19 (-0.47, 0.09) | 0.18                 | 0.74                |                            |
| Height z-scores in adolescence        | Boys     | 2 trials      | 50                  | 0.07 (-0.52, 0.64)  | 0.83                 | 0.27                | 0.57                       |
|                                       | Girls    | 2 trials      | 53                  | -0.17 (-0.73, 0.39) | 0.55                 | 0.63                |                            |
| Height z-scores at >3 years           | Boys     | 5 trials      | 206                 | -0.14 (-0.40, 0.12) | 0.29                 | 0.48                | 0.84                       |
|                                       | Girls    | 5 trials      | 231                 | -0.18 (-0.43, 0.07) | 0.16                 | 0.85                |                            |
| Weight for length z-scores in infancy | Boys     | 18 trials     | 1036                | 0.06 (-0.07, 0.18)  | 0.38                 | 0.17                | 0.42                       |
|                                       | Girls    | 18 trials     | 972                 | -0.02 (-0.15, 0.11) | 0.78                 | 0.62                |                            |
|                                       | Boys     | 10 trials     | 591                 | -0.06 (-0.21, 0.09) | 0.44                 | 0.16                | 0.76                       |



| Outcome                                | Subgroup | No. of trials | No. of participants | aMD (95% CI)        | P for overall effect | P for heterogeneity | P for subgroup interaction |
|----------------------------------------|----------|---------------|---------------------|---------------------|----------------------|---------------------|----------------------------|
| Weight for length z-scores in toddlers | Girls    | 10 trials     | 602                 | -0.03 (-0.18, 0.13) | 0.73                 | 0.51                |                            |
| HC                                     |          |               |                     |                     |                      |                     |                            |
| HC in infancy (cm)                     | Boys     | 18 trials     | 1045                | 0.01 (-0.23, 0.26)  | 0.91                 | 0.05                | 0.94                       |
|                                        | Girls    | 18 trials     | 989                 | -0.00 (-0.25, 0.25) | 0.99                 | 0.12                |                            |
| HC in toddlers (cm)                    | Boys     | 11 trials     | 611                 | -0.09 (-0.35, 0.16) | 0.48                 | 0.71                | 0.70                       |
|                                        | Girls    | 11 trials     | 615                 | -0.16 (-0.41, 0.09) | 0.21                 | 0.07                |                            |
| HC in childhood (cm)                   | Boys     | 3 trials      | 151                 | -0.18 (-0.71, 0.35) | 0.50                 | 0.59                | 0.80                       |
|                                        | Girls    | 3 trials      | 166                 | -0.27 (-0.77, 0.23) | 0.28                 | 0.06                |                            |
| HC z-scores in infancy                 | Boys     | 18 trials     | 1045                | 0.01 (-0.13, 0.16)  | 0.87                 | 0.03                | 0.78                       |
|                                        | Girls    | 18 trials     | 989                 | -0.02 (-0.17, 0.13) | 0.82                 | 0.11                |                            |
| HC z-scores in toddlers                | Boys     | 11 trials     | 611                 | -0.05 (-0.23, 0.13) | 0.56                 | 0.58                | 0.62                       |
|                                        | Girls    | 11 trials     | 615                 | -0.12 (-0.30, 0.06) | 0.20                 | 0.12                |                            |
| Body composition                       |          |               |                     |                     |                      |                     |                            |
| Fat mass in infancy (kg)               | Boys     | 8 trials      | 291                 | 0.01 (-0.12, 0.14)  | 0.83                 | 0.006               | 0.89                       |
|                                        | Girls    | 8 trials      | 278                 | 0.00 (-0.13, 0.13)  | 0.99                 | 0.24                |                            |
| Fat mass in childhood (kg)             | Boys     | 2 trials      | 106                 | 0.09 (-0.84, 1.02)  | 0.84                 | 0.003               | 0.93                       |
|                                        | Girls    | 2 trials      | 138                 | 0.15 (-0.67, 0.98)  | 0.72                 | 0.32                |                            |
| Fat mass in adolescence (kg)           | Boys     | 2 trials      | 49                  | 0.78 (-2.69, 4.24)  | 0.66                 | 0.08                | 0.72                       |
|                                        | Girls    | 2 trials      | 49                  | -0.13 (-3.64, 3.37) | 0.94                 | 0.21                |                            |
| Fat mass at >3 years (kg)              | Boys     | 4 trials      | 155                 | 0.40 (-0.80, 1.59)  | 0.52                 | 0.40                | 0.67                       |
|                                        | Girls    | 4 trials      | 187                 | 0.05 (-1.06, 1.14)  | 0.94                 | 0.004               |                            |
| Fat mass index in infancy (kg/m²)      | Boys     | 8 trials      | 288                 | 0.01 (-0.28, 0.29)  | 0.96                 | 0.02                | 0.78                       |
|                                        | Girls    | 8 trials      | 278                 | -0.05 (-0.34, 0.24) | 0.73                 | 0.55                |                            |
| Fat mass index in childhood (kg/m²)    | Boys     | 2 trials      | 106                 | 0.12 (-0.52, 0.76)  | 0.71                 | 0.003               | 0.91                       |
|                                        | Girls    | 2 trials      | 138                 | 0.07 (-0.49, 0.64)  | 0.80                 | 0.33                |                            |
| Fat mass index in adolescence (kg/m²)  | Boys     | 2 trials      | 49                  | 0.29 (-1.20, 1.79)  | 0.70                 | 0.08                | 0.94                       |
|                                        | Girls    | 2 trials      | 49                  | 0.21 (-1.29, 1.71)  | 0.78                 | 0.04                |                            |
| Fat mass index at >3 years (kg/m²)     | Boys     | 4 trials      | 155                 | 0.22 (-0.41, 0.84)  | 0.50                 | 0.26                | 0.76                       |
|                                        | Girls    | 4 trials      | 187                 | 0.09 (-0.49, 0.66)  | 0.77                 | 0.40                |                            |
|                                        | Boys     | 8 trials      | 289                 | -0.35 (-1.87, 1.17) | 0.65                 | 0.03                | 0.53                       |

| Outcome                                | Subgroup | No. of trials | No. of participants | aMD (95% CI)         | P for overall effect | P for heterogeneity | P for subgroup interaction |
|----------------------------------------|----------|---------------|---------------------|----------------------|----------------------|---------------------|----------------------------|
| Percent fat mass in infancy (%)        | Girls    | 8 trials      | 278                 | -0.71 (-2.26, 0.84)  | 0.37                 | 0.87                |                            |
| Percent fat mass in childhood (%)      | Boys     | 2 trials      | 106                 | 1.11 (-2.68, 4.90)   | 0.57                 | 0.006               | 0.73                       |
|                                        | Girls    | 2 trials      | 138                 | 0.21 (-3.15, 3.56)   | 0.91                 | 0.35                |                            |
| Percent fat mass in adolescence (%)    | Boys     | 2 trials      | 49                  | -0.89 (-5.60, 3.81)  | 0.71                 | 0.20                | 0.81                       |
|                                        | Girls    | 2 trials      | 49                  | -0.11 (-4.18, 4.61)  | 0.97                 | 0.07                |                            |
| Percent fat mass at >3 years (%)       | Boys     | 4 trials      | 155                 | 0.58 (-2.40, 3.56)   | 0.70                 | 0.02                | 0.83                       |
|                                        | Girls    | 4 trials      | 187                 | 0.14 (-2.60, 2.87)   | 0.92                 | 0.46                |                            |
| Lean mass in infancy (kg)              | Boys     | 8 trials      | 291                 | 0.16 (-0.05, 0.37)   | 0.13                 | 0.004               | 0.82                       |
|                                        | Girls    | 8 trials      | 278                 | 0.13 (-0.08, 0.34)   | 0.23                 | 0.28                |                            |
| Lean mass in childhood (kg)            | Boys     | 2 trials      | 106                 | -0.70 (-1.71, 0.32)  | 0.18                 | 0.37                | 0.31                       |
|                                        | Girls    | 2 trials      | 138                 | -0.01 (-0.90, 0.89)  | 0.99                 | 0.80                |                            |
| Lean mass in adolescence (kg)          | Boys     | 2 trials      | 49                  | 0.15 (-2.79, 3.08)   | 0.92                 | 0.22                | 0.71                       |
|                                        | Girls    | 2 trials      | 49                  | -0.65 (-3.63, 2.32)  | 0.66                 | 0.75                |                            |
| Lean mass at >3 years (kg)             | Boys     | 4 trials      | 155                 | -0.52 (-1.63, 0.59)  | 0.36                 | 0.33                | 0.67                       |
|                                        | Girls    | 4 trials      | 187                 | -0.19 (-1.20, 0.83)  | 0.72                 | 0.93                |                            |
| Lean mass index in infancy (kg/m²)     | Boys     | 8 trials      | 288                 | 0.21 (-0.13, 0.55)   | 0.23                 | 0.20                | 0.96                       |
|                                        | Girls    | 8 trials      | 278                 | 0.22 (-0.13, 0.56)   | 0.22                 | 0.79                |                            |
| Lean mass index in childhood (kg/m²)   | Boys     | 2 trials      | 106                 | -0.45 (-1.02, 0.12)  | 0.12                 | 0.79                | 0.20                       |
|                                        | Girls    | 2 trials      | 138                 | 0.05 (-0.46, 0.55)   | 0.86                 | 0.48                |                            |
| Lean mass index in adolescence (kg/m²) | Boys     | 2 trials      | 49                  | -0.16 (-1.20, 0.88)  | 0.77                 | 0.08                | 0.93                       |
|                                        | Girls    | 2 trials      | 49                  | -0.09 (-1.14, 0.97)  | 0.87                 | 0.99                |                            |
| Lean mass index at >3 years (kg/m²)    | Boys     | 4 trials      | 155                 | -0.38 (-0.88, 0.12)  | 0.14                 | 0.19                | 0.29                       |
|                                        | Girls    | 4 trials      | 187                 | -0.02 (-0.47, 0.44)  | 0.95                 | 0.89                |                            |
| Bone development                       |          |               |                     |                      |                      |                     |                            |
| BMC in infancy (g)                     | Boys     | 6 trials      | 158                 | 7.86 (-5.72, 21.45)  | 0.26                 | 0.06                | 0.63                       |
|                                        | Girls    | 6 trials      | 155                 | 12.58 (-1.28, 26.43) | 0.08                 | 0.79                |                            |

| Outcome                | Subgroup | No. of trials | No. of participants | aMD (95% CI)            | P for overall effect | P for heterogeneity | P for subgroup interaction |
|------------------------|----------|---------------|---------------------|-------------------------|----------------------|---------------------|----------------------------|
| BMC in adolescence (g) | Boys     | 2 trials      | 49                  | -0.31 (-146.51, 145.89) | 0.99                 | 0.72                | 0.61                       |
|                        | Girls    | 2 trials      | 49                  | -54.74 (-203.05, 93.58) | 0.47                 | 0.81                |                            |
| BMD in infancy         | Boys     | 5 trials      | 131                 | 0.005 (-0.008, 0.018)   | 0.45                 | 0.20                | 0.55                       |
|                        | Girls    | 5 trials      | 136                 | 0.011 (-0.002, 0.023)   | 0.11                 | 0.98                |                            |
| BMD in adolescence     | Boys     | 2 trials      | 49                  | 0.002 (-0.039, 0.043)   | 0.92                 | 0.51                | 0.44                       |
|                        | Girls    | 2 trials      | 49                  | -0.021 (-0.062, 0.021)  | 0.32                 | 0.82                |                            |

Abbreviation: BMI: body mass index; HC: head circumference; BMC: bone mineral content; BMD: bone mineral density; aMD: adjusted mean difference.

Mean differences were adjusted for gestational age and birthweight z-scores.

**Table S3. Subgroup analyses of size for gestation of the infants**

| Outcome                     | Subgroup | No. of trials | No. of participants | aMD (95% CI)        | P for overall effect | P for heterogeneity | P for subgroup interaction |
|-----------------------------|----------|---------------|---------------------|---------------------|----------------------|---------------------|----------------------------|
| BMI                         |          |               |                     |                     |                      |                     |                            |
| BMI in childhood (kg/m²)    | AGA      | 3 trials      | 280                 | 0.02 (-0.38, 0.41)  | 0.93                 | 0.63                | 0.21                       |
|                             | SGA      | 3 trials      | 53                  | -0.63 (-1.55, 0.29) | 0.18                 | 0.17                |                            |
| BMI in infancy (kg/m²)      | AGA      | 18 trials     | 1442                | 0.06 (-0.09, 0.21)  | 0.44                 | 0.39                | 0.52                       |
|                             | SGA      | 18 trials     | 566                 | -0.03 (-0.28, 0.21) | 0.79                 | 0.32                |                            |
| BMI in toddlers (kg/m²)     | AGA      | 10 trials     | 865                 | -0.06 (-0.23, 0.11) | 0.48                 | 0.93                | 0.77                       |
|                             | SGA      | 10 trials     | 329                 | -0.11 (-0.39, 0.17) | 0.44                 | 0.75                |                            |
| BMI in adolescence (kg/m²)  | AGA      | 2 trials      | 83                  | 0.04 (-1.54, 1.61)  | 0.96                 | 0.03                | 0.68                       |
|                             | SGA      | 2 trials      | 20                  | 0.82 (-2.54, 4.18)  | 0.63                 | 0.01                |                            |
| BMI at >3 years (kg/m²)     | AGA      | 5 trials      | 363                 | 0.01 (-0.46, 0.48)  | 0.97                 | 0.01                | 0.79                       |
|                             | SGA      | 5 trials      | 73                  | -0.15 (-1.20, 0.90) | 0.78                 | 0.01                |                            |
| BMI z-scores in infancy     | AGA      | 18 trials     | 1442                | -0.04 (-0.22, 0.13) | 0.63                 | 0.45                | 0.36                       |
|                             | SGA      | 18 trials     | 566                 | 0.05 (-0.06, 0.16)  | 0.37                 | 0.14                |                            |
| BMI z-scores in toddlers    | AGA      | 10 trials     | 865                 | -0.07 (-0.20, 0.06) | 0.32                 | 0.81                | 0.77                       |
|                             | SGA      | 10 trials     | 329                 | -0.10 (-0.31, 0.11) | 0.34                 | 0.98                |                            |
| BMI z-scores in childhood   | AGA      | 3 trials      | 280                 | -0.03 (-0.28, 0.23) | 0.85                 | 0.72                | 0.29                       |
|                             | SGA      | 3 trials      | 53                  | -0.37 (-0.96, 0.22) | 0.21                 | 0.25                |                            |
| BMI z-scores in adolescence | AGA      | 2 trials      | 83                  | -0.05 (-0.63, 0.53) | 0.87                 | 0.02                | 1.00                       |
|                             | SGA      | 2 trials      | 20                  | -0.05 (-1.29, 1.18) | 0.93                 | 0.004               |                            |
| BMI z-scores at >3 years    | AGA      | 5 trials      | 363                 | -0.04 (-0.28, 0.19) | 0.73                 | 0.06                | 0.55                       |
|                             | SGA      | 5 trials      | 73                  | -0.22 (-0.74, 0.31) | 0.42                 | 0.01                |                            |
| Weight                      |          |               |                     |                     |                      |                     |                            |
| Weight in infancy (kg)      | AGA      | 18 trials     | 1462                | 0.11 (-0.02, 0.24)  | 0.08                 | 0.03                | 0.62                       |
|                             | SGA      | 18 trials     | 570                 | 0.05 (-0.16, 0.26)  | 0.62                 | 0.05                |                            |
| Weight in toddlers (kg)     | AGA      | 10 trials     | 872                 | 0.02 (-0.16, 0.20)  | 0.80                 | 0.92                | 0.68                       |
|                             | SGA      | 10 trials     | 332                 | -0.05 (-0.34, 0.25) | 0.74                 | 0.87                |                            |
| Weight in childhood (kg)    | AGA      | 3 trials      | 280                 | -0.18 (-1.01, 0.66) | 0.68                 | 0.58                | 0.14                       |
|                             | SGA      | 3 trials      | 53                  | -1.79 (-3.73, 0.16) | 0.07                 | 0.13                |                            |
| Weight in adolescence (kg)  | AGA      | 2 trials      | 83                  | -0.53 (-4.99, 3.94) | 0.82                 | 0.14                | 0.54                       |
|                             | SGA      | 2 trials      | 20                  | 2.74 (-6.79, 12.26) | 0.57                 | 0.01                |                            |
| Weight at >3 years (kg)     | AGA      | 5 trials      | 363                 | -0.26 (-1.45, 0.93) | 0.67                 | 0.09                | 0.85                       |
|                             | SGA      | 5 trials      | 73                  | -0.55 (-3.23, 2.13) | 0.69                 | 0.001               |                            |
| Weight z-scores in infancy  | AGA      | 18 trials     | 1462                | 0.11 (-0.01, 0.22)  | 0.07                 | 0.02                | 0.30                       |
|                             | SGA      | 18 trials     | 570                 | -0.01 (-0.19, 0.18) | 0.95                 | 0.16                |                            |
|                             | AGA      | 10 trials     | 872                 | 0.05 (-0.08, 0.18)  | 0.43                 | 0.75                | 0.40                       |

| Outcome                                | Subgroup | No. of trials | No. of participants | aMD (95% CI)         | P for overall effect | P for heterogeneity | P for subgroup interaction |
|----------------------------------------|----------|---------------|---------------------|----------------------|----------------------|---------------------|----------------------------|
| Weight z-scores in toddlers            | SGA      | 10 trials     | 332                 | -0.05 (0.26, 0.16)   | 0.63                 | 0.74                | 0.06                       |
| Weight z-scores in childhood           | AGA      | 3 trials      | 278                 | -0.09 (-0.33, 0.15)  | 0.47                 | 0.69                |                            |
|                                        | SGA      | 3 trials      | 53                  | -0.67 (-1.23, -0.12) | 0.02                 | 0.49                |                            |
| Length/ height                         |          |               |                     |                      |                      |                     |                            |
| Length in infancy (cm)                 | AGA      | 18 trials     | 1442                | 0.38 (-0.05, 0.80)   | 0.08                 | 0.006               | 0.99                       |
|                                        | SGA      | 18 trials     | 566                 | 0.38 (-0.29, 1.05)   | 0.27                 | 0.09                |                            |
| Height in toddlers (cm)                | AGA      | 10 trials     | 868                 | 0.22 (-0.29, 0.72)   | 0.40                 | 0.46                | 0.50                       |
|                                        | SGA      | 10 trials     | 330                 | 0.12 (-0.71, 0.64)   | 0.78                 | 0.39                |                            |
| Height in childhood (cm)               | AGA      | 3 trials      | 280                 | -0.64 (-1.91, 0.62)  | 0.32                 | 0.77                | 0.28                       |
|                                        | SGA      | 3 trials      | 54                  | -2.41 (-5.35, 0.53)  | 0.11                 | 0.76                |                            |
| Height in adolescence (cm)             | AGA      | 2 trials      | 83                  | -1.46 (-5.40, 2.49)  | 0.47                 | 0.90                | 0.61                       |
|                                        | SGA      | 2 trials      | 20                  | 0.97 (-7.44, 9.38)   | 0.82                 | 0.10                |                            |
| Height at >3 years (cm)                | AGA      | 5 trials      | 363                 | -0.80 (-2.12, 0.51)  | 0.23                 | 0.96                | 0.48                       |
|                                        | SGA      | 5 trials      | 73                  | -1.97 (-4.92, 0.97)  | 0.19                 | 0.13                |                            |
| Length z-scores in infancy             | AGA      | 18 trials     | 1442                | 0.06 (-0.01, 0.24)   | 0.07                 | 0.05                | 0.57                       |
|                                        | SGA      | 18 trials     | 566                 | 0.05 (-0.15, 0.25)   | 0.64                 | 0.40                |                            |
| Height z-scores in toddlers            | AGA      | 10 trials     | 868                 | 0.15 (0.01, 0.30)    | 0.04                 | 0.13                | 0.36                       |
|                                        | SGA      | 10 trials     | 330                 | 0.02 (-0.22, 0.25)   | 0.87                 | 0.54                |                            |
| Height z-scores in childhood           | AGA      | 3 trials      | 280                 | -0.07 (-0.30, 0.15)  | 0.52                 | 0.40                | 0.02                       |
|                                        | SGA      | 3 trials      | 54                  | -0.77 (-1.28, -0.25) | 0.004                | 0.56                |                            |
| Height z-scores in adolescence         | AGA      | 2 trials      | 83                  | -0.06 (-0.52, 0.39)  | 0.79                 | 0.50                | 0.73                       |
|                                        | SGA      | 2 trials      | 20                  | 0.13 (-0.84, 1.09)   | 0.80                 | 0.002               |                            |
| Height z-scores at >3 years            | AGA      | 5 trials      | 363                 | -0.07 (-0.27, 0.13)  | 0.47                 | 0.72                | 0.08                       |
|                                        | SGA      | 5 trials      | 73                  | -0.51 (-0.95, -0.06) | 0.03                 | 0.002               |                            |
| Weight for length z-scores in infancy  | AGA      | 18 trials     | 1442                | 0.06 (-0.05, 0.18)   | 0.29                 | 0.15                | 0.23                       |
|                                        | SGA      | 18 trials     | 566                 | -0.07 (-0.24, 0.11)  | 0.45                 | 0.43                |                            |
| Weight for length z-scores in toddlers | AGA      | 10 trials     | 865                 | -0.03 (-0.16, 0.10)  | 0.67                 | 0.77                | 0.58                       |
|                                        | SGA      | 10 trials     | 329                 | -0.10 (-0.31, 0.11)  | 0.36                 | 0.96                |                            |
| HC                                     |          |               |                     |                      |                      |                     |                            |
| HC in infancy (cm)                     | AGA      | 18 trials     | 1465                | 0.06 (-0.14, 0.27)   | 0.54                 | 0.05                | 0.34                       |
|                                        | SGA      | 18 trials     | 569                 | -0.13 (-0.46, 0.21)  | 0.46                 | 0.12                |                            |
| HC in toddlers (cm)                    | AGA      | 11 trials     | 896                 | -0.11 (-0.32, 0.10)  | 0.30                 | 0.62                | 0.78                       |
|                                        | SGA      | 11 trials     | 330                 | -0.17 (-0.52, 0.18)  | 0.34                 | 0.31                |                            |
| HC in childhood (cm)                   | AGA      | 3 trials      | 264                 | -0.15 (-0.55, 0.25)  | 0.47                 | 0.61                | 0.54                       |
|                                        | SGA      | 3 trials      | 53                  | -0.45 (-1.36, 0.45)  | 0.33                 | 0.84                |                            |

| Outcome                               | Subgroup | No. of trials | No. of participants | aMD (95% CI)        | P for overall effect | P for heterogeneity | P for subgroup interaction |
|---------------------------------------|----------|---------------|---------------------|---------------------|----------------------|---------------------|----------------------------|
| HC z-scores in infancy                | AGA      | 18 trials     | 1465                | 0.06 (-0.06, 0.18)  | 0.34                 | 0.02                | 0.08                       |
|                                       | SGA      | 18 trials     | 569                 | -0.15 (-0.35, 0.05) | 0.14                 | 0.67                |                            |
| HC z-scores in toddlers               | AGA      | 11 trials     | 896                 | 0.08 (-0.21, 0.09)  | 0.41                 | 0.70                | 0.56                       |
|                                       | SGA      | 11 trials     | 330                 | -0.15 (-0.40, 0.10) | 0.24                 | 0.29                |                            |
| Body composition                      |          |               |                     |                     |                      |                     |                            |
| Fat mass in infancy (kg)              | AGA      | 8 trials      | 422                 | 0.01 (-0.10, 0.11)  | 0.93                 | 0.03                | 0.70                       |
|                                       | SGA      | 8 trials      | 147                 | 0.05 (-0.14, 0.23)  | 0.61                 | 0.11                |                            |
| Fat mass in childhood (kg)            | AGA      | 2 trials      | 211                 | 0.21 (-0.46, 0.88)  | 0.54                 | 0.37                | 0.59                       |
|                                       | SGA      | 2 trials      | 33                  | -0.29 (-1.98, 1.40) | 0.73                 | 0.90                |                            |
| Fat mass in adolescence (kg)          | AGA      | 2 trials      | 78                  | -0.03 (-2.77, 2.72) | 0.99                 | 0.08                | 0.50                       |
|                                       | SGA      | 2 trials      | 20                  | 2.15 (-3.53, 7.84)  | 0.45                 | 0.02                |                            |
| Fat mass at >3 years (kg)             | AGA      | 4 trials      | 289                 | 0.13 (-0.76, 1.01)  | 0.78                 | 0.02                | 0.63                       |
|                                       | SGA      | 4 trials      | 53                  | 0.68 (-1.41, 2.77)  | 0.52                 | 0.04                |                            |
| Fat mass index in infancy (kg/m²)     | AGA      | 8 trials      | 419                 | -0.03 (-0.27, 0.21) | 0.83                 | 0.03                | 0.78                       |
|                                       | SGA      | 8 trials      | 147                 | 0.04 (-0.36, 0.44)  | 0.85                 | 0.07                |                            |
| Fat mass index in childhood (kg/m²)   | AGA      | 2 trials      | 211                 | 0.14 (-0.32, 0.60)  | 0.56                 | 0.38                | 0.70                       |
|                                       | SGA      | 2 trials      | 33                  | -0.11 (-1.27, 1.06) | 0.86                 | 0.91                |                            |
| Fat mass index in adolescence (kg/m²) | AGA      | 2 trials      | 78                  | 0.17 (-1.02, 1.36)  | 0.78                 | 0.02                | 0.69                       |
|                                       | SGA      | 2 trials      | 20                  | 0.72 (-1.73, 3.17)  | 0.56                 | 0.06                |                            |
| Fat mass index at >3 years (kg/m²)    | AGA      | 4 trials      | 289                 | 0.14 (-0.32, 0.60)  | 0.55                 | 0.02                | 0.17                       |
|                                       | SGA      | 4 trials      | 53                  | 0.19 (-0.90, 1.28)  | 0.73                 | 0.18                |                            |
| Percent fat mass in infancy (%)       | AGA      | 8 trials      | 420                 | -0.79 (-2.05, 0.47) | 0.22                 | 0.04                | 0.35                       |
|                                       | SGA      | 8 trials      | 147                 | 0.38 (-1.75, 2.51)  | 0.73                 | 0.09                |                            |
| Percent fat mass in childhood (%)     | AGA      | 2 trials      | 211                 | 0.81 (-1.91, 3.53)  | 0.56                 | 0.42                | 0.71                       |
|                                       | SGA      | 2 trials      | 33                  | -0.59 (-7.44, 6.26) | 0.87                 | 0.93                |                            |
| Percent fat mass in adolescence (%)   | AGA      | 2 trials      | 78                  | -0.68 (-4.45, 3.09) | 0.72                 | 0.03                | 0.69                       |
|                                       | SGA      | 2 trials      | 20                  | 1.04 (-6.71, 8.80)  | 0.79                 | 0.23                |                            |
| Percent fat mass at >3 years (%)      | AGA      | 4 trials      | 289                 | 0.43 (-1.76, 2.63)  | 0.70                 | 0.26                | 0.86                       |
|                                       | SGA      | 4 trials      | 53                  | -0.07 (-5.26, 5.13) | 0.98                 | 0.56                |                            |
| Lean mass in infancy (kg)             | AGA      | 8 trials      | 422                 | 0.20 (0.03, 0.37)   | 0.03                 | 0.14                | 0.35                       |
|                                       | SGA      | 8 trials      | 147                 | 0.04 (-0.25, 0.32)  | 0.82                 | 0.12                |                            |
| Lean mass in childhood (kg)           | AGA      | 2 trials      | 211                 | -0.24 (-0.98, 0.50) | 0.53                 | 0.35                | 0.73                       |
|                                       | SGA      | 2 trials      | 33                  | -0.59 (-2.46, 1.28) | 0.54                 | 0.87                |                            |
|                                       | AGA      | 2 trials      | 78                  | -0.47 (-2.79, 1.84) | 0.69                 | 0.48                | 0.70                       |

| Outcome                                             | Subgroup | No. of trials | No. of participants | aMD (95% CI)             | P for overall effect | P for heterogeneity | P for subgroup interaction |
|-----------------------------------------------------|----------|---------------|---------------------|--------------------------|----------------------|---------------------|----------------------------|
| Lean mass in adolescence (kg)                       | SGA      | 2 trials      | 20                  | 0.56 (-4.23, 5.35)       | 0.82                 | 0.13                |                            |
| Lean mass at >3 years (kg)                          | AGA      | 4 trials      | 289                 | -0.33 (-1.15, 0.49)      | 0.43                 | 0.57                | 0.95                       |
|                                                     | SGA      | 4 trials      | 53                  | -0.27 (-2.20, 1.67)      | 0.79                 | 0.23                |                            |
| Lean mass index in infancy (kg/m <sup>2</sup> )     | AGA      | 8 trials      | 419                 | 0.33 (0.05, 0.61)        | 0.02                 | 0.05                | 0.10                       |
|                                                     | SGA      | 8 trials      | 147                 | -0.14 (-0.61, 0.34)      | 0.57                 | 0.84                |                            |
| Lean mass index in childhood (kg/m <sup>2</sup> )   | AGA      | 2 trials      | 211                 | -0.17 (-0.58, 0.25)      | 0.44                 | 0.46                | 0.85                       |
|                                                     | SGA      | 2 trials      | 33                  | -0.05 (-1.10, 0.99)      | 0.92                 | 0.34                |                            |
| Lean mass index in adolescence (kg/m <sup>2</sup> ) | AGA      | 2 trials      | 78                  | -0.19 (-1.01, 0.63)      | 0.64                 | 0.05                | 0.76                       |
|                                                     | SGA      | 2 trials      | 20                  | 0.10 (-1.59, 1.80)       | 0.91                 | 0.11                |                            |
| Lean mass index at >3 years (kg/m <sup>2</sup> )    | AGA      | 4 trials      | 289                 | -0.20 (-0.57, 0.17)      | 0.29                 | 0.08                | 0.64                       |
|                                                     | SGA      | 4 trials      | 53                  | 0.03 (-0.85, 0.90)       | 0.95                 | 0.35                |                            |
| <b>Bone development</b>                             |          |               |                     |                          |                      |                     |                            |
| BMC in infancy (g)                                  | AGA      | 6 trials      | 248                 | 11.06 (0.20, 21.93)      | 0.046                | 0.31                | 0.90                       |
|                                                     | SGA      | 6 trials      | 65                  | 9.50 (-11.85, 30.54)     | 0.38                 | 0.21                |                            |
| BMC in adolescence (g)                              | AGA      | 2 trials      | 78                  | -32.23 (-147.59, 83.14)  | 0.58                 | 0.91                | 0.88                       |
|                                                     | SGA      | 2 trials      | 20                  | -12.33 (-251.26, 226.59) | 0.92                 | 0.17                |                            |
| BMD in infancy                                      | AGA      | 5 trials      | 212                 | 0.007 (-0.003, 0.018)    | 0.15                 | 0.45                | 0.98                       |
|                                                     | SGA      | 5 trials      | 55                  | 0.007 (-0.013, 0.027)    | 0.49                 | 0.59                |                            |
| BMD in adolescence                                  | AGA      | 2 trials      | 78                  | -0.006 (-0.038, 0.027)   | 0.72                 | 0.51                | 0.57                       |
|                                                     | SGA      | 2 trials      | 20                  | -0.027 (-0.094, 0.040)   | 0.42                 | 0.56                |                            |

Abbreviation: AGA: appropriate for gestational age; SGA: small for gestational age; BMI: body mass index; HC: head circumference; BMC: bone mineral content; BMD: bone mineral density; aMD: adjusted mean difference.

Mean differences were adjusted for sex and gestational age.

**Table S4. Subgroup analyses of size of infant at birth**

| Outcome                     | Subgroup | No. of trials | No. of participants | aMD (95% CI)        | P for overall effect | P for heterogeneity | P for subgroup interaction |
|-----------------------------|----------|---------------|---------------------|---------------------|----------------------|---------------------|----------------------------|
| BMI                         |          |               |                     |                     |                      |                     |                            |
| BMI in childhood (kg/m²)    | ≤1 kg    | 3 trials      | 76                  | 0.47 (-0.37, 1.31)  | 0.27                 | 0.13                | 0.12                       |
|                             | >1 kg    | 3 trials      | 257                 | -0.25 (-0.66, 0.15) | 0.22                 | 0.26                |                            |
| BMI in infancy (kg/m²)      | ≤1 kg    | 17 trials     | 436                 | 0.04 (-0.24, 0.32)  | 0.77                 | 0.89                | 0.89                       |
|                             | >1 kg    | 18 trials     | 1572                | 0.02 (-0.13, 0.17)  | 0.78                 | 0.36                |                            |
| BMI in toddlers (kg/m²)     | ≤1 kg    | 9 trials      | 231                 | -0.07 (-0.40, 0.27) | 0.70                 | 0.47                | 0.91                       |
|                             | >1 kg    | 10 trials     | 963                 | -0.09 (-0.25, 0.08) | 0.30                 | 0.44                |                            |
| BMI in adolescence (kg/m²)  | ≤1 kg    | 2 trials      | 10                  | -3.05 (-6.59, 0.50) | 0.08                 | 0.20                | 0.22                       |
|                             | >1 kg    | 2 trials      | 93                  | 0.57 (-0.95, 2.08)  | 0.46                 | 0.04                |                            |
| BMI at >3 years (kg/m²)     | ≤1 kg    | 5 trials      | 86                  | 0.13 (-0.70, 0.96)  | 0.75                 | 0.08                | 0.76                       |
|                             | >1 kg    | 5 trials      | 350                 | -0.05 (-0.54, 0.45) | 0.86                 | 0.01                |                            |
| BMI z-scores in infancy     | ≤1 kg    | 17 trials     | 436                 | 0.008 (-0.19, 0.21) | 0.93                 | 0.91                | 0.92                       |
|                             | >1 kg    | 18 trials     | 1572                | 0.02 (-0.86, 0.13)  | 0.71                 | 0.35                |                            |
| BMI z-scores in toddlers    | ≤1 kg    | 9 trials      | 231                 | -0.08 (-0.34, 0.17) | 0.52                 | 0.41                | 1.00                       |
|                             | >1 kg    | 10 trials     | 963                 | -0.08 (-0.21, 0.04) | 0.19                 | 0.38                |                            |
| BMI z-scores in childhood   | ≤1 kg    | 3 trials      | 76                  | 0.33 (-0.20, 0.86)  | 0.22                 | 0.11                | 0.07                       |
|                             | >1 kg    | 3 trials      | 257                 | -0.21 (-0.46, 0.05) | 0.12                 | 0.45                |                            |
| BMI z-scores in adolescence | ≤1 kg    | 2 trials      | 10                  | -1.19 (-3.01, 0.63) | 0.16                 | 0.38                | 0.13                       |
|                             | >1 kg    | 2 trials      | 93                  | 0.13 (-0.41, 0.68)  | 0.63                 | 0.03                |                            |
| BMI z-scores at >3 years    | ≤1 kg    | 5 trials      | 86                  | 0.16 (-0.35, 0.66)  | 0.54                 | 0.11                | 0.36                       |
|                             | >1 kg    | 5 trials      | 350                 | -0.12 (-0.36, 0.12) | 0.33                 | 0.04                |                            |
| Weight                      |          |               |                     |                     |                      |                     |                            |
| Weight in infancy (kg)      | ≤1 kg    | 17 trials     | 449                 | 0.06 (-0.18, 0.29)  | 0.63                 | 0.43                | 0.83                       |
|                             | >1 kg    | 18 trials     | 1583                | 0.09 (-0.04, 0.21)  | 0.17                 | 0.12                |                            |
| Weight in toddlers (kg)     | ≤1 kg    | 9 trials      | 233                 | -0.18 (-0.54, 0.18) | 0.33                 | 0.87                | 0.30                       |
|                             | >1 kg    | 10 trials     | 971                 | 0.03 (-0.14, 0.21)  | 0.73                 | 0.81                |                            |



| Outcome                      | Subgroup | No. of trials | No. of participants | aMD (95% CI)         | P for overall effect | P for heterogeneity | P for subgroup interaction |
|------------------------------|----------|---------------|---------------------|----------------------|----------------------|---------------------|----------------------------|
| Weight in childhood (kg)     | ≤1 kg    | 3 trials      | 76                  | -0.26 (-1.86, 1.33)  | 0.75                 | 0.38                | 0.75                       |
|                              | >1 kg    | 3 trials      | 257                 | -0.56 (-1.42, 0.31)  | 0.21                 | 0.55                |                            |
| Weight in adolescence (kg)   | ≤1 kg    | 2 trials      | 10                  | -5.12 (-18.06, 7.82) | 0.43                 | N/A                 | 0.40                       |
|                              | >1 kg    | 2 trials      | 93                  | 0.77 (-3.47, 5.00)   | 0.72                 | 0.16                |                            |
| Weight at >3 years (kg)      | ≤1 kg    | 5 trials      | 86                  | -0.82 (-3.27, 1.64)  | 0.52                 | 0.55                | 0.68                       |
|                              | >1 kg    | 5 trials      | 350                 | -0.24 (-1.45, 0.98)  | 0.70                 | 0.13                |                            |
| Weight z-scores in infancy   | ≤1 kg    | 17 trials     | 449                 | 0.02 (-0.19, 0.23)   | 0.85                 | 0.58                | 0.65                       |
|                              | >1 kg    | 18 trials     | 1583                | 0.08 (-0.04, 0.19)   | 0.18                 | 0.18                |                            |
| Weight z-scores in toddlers  | ≤1 kg    | 9 trials      | 233                 | 0.13 (-0.36, 0.16)   | 0.44                 | 0.86                | 0.33                       |
|                              | >1 kg    | 10 trials     | 971                 | 0.04 (-0.09, 0.17)   | 0.53                 | 0.90                |                            |
| Weight z-scores in childhood | ≤1 kg    | 3 trials      | 75                  | -0.04 (-0.51, 0.42)  | 0.85                 | 0.44                | 0.46                       |
|                              | >1 kg    | 3 trials      | 256                 | -0.24 (-0.49, 0.01)  | 0.06                 | 0.87                |                            |
| Length/ height               |          |               |                     |                      |                      |                     |                            |
| Length in infancy (cm)       | ≤1 kg    | 17 trials     | 436                 | 0.29 (-0.48, 1.06)   | 0.46                 | 0.63                | 0.89                       |
|                              | >1 kg    | 18 trials     | 1572                | 0.35 (-0.05, 0.76)   | 0.09                 | 0.10                |                            |
| Height in toddlers (cm)      | ≤1 kg    | 9 trials      | 231                 | -0.49 (-1.48, 0.51)  | 0.34                 | 0.95                | 0.15                       |
|                              | >1 kg    | 10 trials     | 967                 | 0.33 (-0.16, 0.81)   | 0.19                 | 0.11                |                            |
| Height in childhood (cm)     | ≤1 kg    | 3 trials      | 77                  | -2.54 (-4.97, -0.11) | 0.04                 | 0.85                | 0.16                       |
|                              | >1 kg    | 3 trials      | 257                 | -0.56 (-1.89, 0.77)  | 0.41                 | 0.84                |                            |
| Height in adolescence (cm)   | ≤1 kg    | 2 trials      | 10                  | -1.90 (-13.39, 9.59) | 0.74                 | N/A                 | 0.87                       |
|                              | >1 kg    | 2 trials      | 93                  | -0.87 (-4.63, 2.89)  | 0.65                 | 0.96                |                            |
| Height at >3 years (cm)      | ≤1 kg    | 5 trials      | 87                  | -2.49 (-5.20, 0.23)  | 0.07                 | 0.48                | 0.24                       |
|                              | >1 kg    | 5 trials      | 350                 | -0.66 (-2.01, 0.68)  | 0.33                 | 0.98                |                            |
| Length z-scores in infancy   | ≤1 kg    | 17 trials     | 436                 | 0.02 (-0.21, 0.25)   | 0.85                 | 0.66                | 0.55                       |
|                              | >1 kg    | 18 trials     | 1572                | 0.10 (-0.02, 0.22)   | 0.10                 | 0.08                |                            |
| Height z-scores in toddlers  | ≤1 kg    | 9 trials      | 231                 | -0.09 (-0.37, 0.20)  | 0.55                 | 0.97                | 0.13                       |
|                              | >1 kg    | 10 trials     | 967                 | 0.16 (0.02, 0.29)    | 0.03                 | 0.18                |                            |
|                              | ≤1 kg    | 3 trials      | 77                  | -0.48 (-0.91, -0.05) | 0.03                 | 0.48                | 0.15                       |

| Outcome                                | Subgroup | No. of trials | No. of participants | aMD (95% CI)         | P for overall effect | P for heterogeneity | P for subgroup interaction |
|----------------------------------------|----------|---------------|---------------------|----------------------|----------------------|---------------------|----------------------------|
| Height z-scores in childhood           | >1 kg    | 3 trials      | 257                 | -0.12 (-0.35, 0.12)  | 0.33                 | 0.40                |                            |
| Height z-scores in adolescence         | ≤1 kg    | 2 trials      | 10                  | -0.27 (-1.58, 1.05)  | 0.69                 | N/A                 | 0.67                       |
|                                        | >1 kg    | 2 trials      | 93                  | 0.22 (-0.41, 0.46)   | 0.90                 | 0.44                |                            |
| Height z-scores at >3 years            | ≤1 kg    | 5 trials      | 87                  | -0.45 (-0.86, -0.04) | 0.03                 | 0.43                | 0.12                       |
|                                        | >1 kg    | 5 trials      | 350                 | -0.08 (-0.28, 0.13)  | 0.45                 | 0.56                |                            |
| Weight for length z-scores in infancy  | ≤1 kg    | 17 trials     | 436                 | -0.01 (-0.2\, 0.19)  | 0.93                 | 0.91                | 0.79                       |
|                                        | >1 kg    | 18 trials     | 1572                | 0.02 (-0.08, 0.13)   | 0.69                 | 0.19                |                            |
| Weight for length z-scores in toddlers | ≤1 kg    | 9 trials      | 231                 | -0.09 (-0.35, 0.16)  | 0.49                 | 0.49                | 0.75                       |
|                                        | >1 kg    | 10 trials     | 963                 | -0.05 (-0.17, 0.08)  | 0.47                 | 0.57                |                            |
| HC                                     |          |               |                     |                      |                      |                     |                            |
| HC in infancy (cm)                     | ≤1 kg    | 17 trials     | 449                 | -0.02 (-0.40, 0.35)  | 0.90                 | 0.71                | 0.91                       |
|                                        | >1 kg    | 18 trials     | 1585                | 0.001 (-0.20, 0.20)  | 0.99                 | 0.52                |                            |
| HC in toddlers (cm)                    | ≤1 kg    | 18 trials     | 261                 | -0.06 (-0.46, 0.33)  | 0.76                 | 0.62                | 0.68                       |
|                                        | >1 kg    | 19 trials     | 965                 | -0.16 (-0.36, 0.05)  | 0.14                 | 0.55                |                            |
| HC in childhood (cm)                   | ≤1 kg    | 3 trials      | 74                  | -0.51 (-1.26, 0.24)  | 0.18                 | 0.84                | 0.40                       |
|                                        | >1 kg    | 3 trials      | 243                 | -0.14 (-0.55, 0.27)  | 0.51                 | 0.17                |                            |
| HC z-scores in infancy                 | ≤1 kg    | 17 trials     | 449                 | -0.02 (-0.24, 0.20)  | 0.85                 | 0.69                | 0.90                       |
|                                        | >1 kg    | 18 trials     | 1585                | -0.005 (-0.12, 0.11) | 0.94                 | 0.41                |                            |
| HC z-scores in toddlers                | ≤1 kg    | 18 trials     | 261                 | -0.05 (-0.33, 0.23)  | 0.72                 | 0.64                | 0.74                       |
|                                        | >1 kg    | 19 trials     | 965                 | -0.11 (-0.25, 0.04)  | 0.16                 | 0.70                |                            |
| Body composition                       |          |               |                     |                      |                      |                     |                            |
| Fat mass in infancy (kg)               | ≤1 kg    | 8 trials      | 161                 | -0.03 (-0.21, 0.14)  | 0.71                 | 0.65                | 0.57                       |
|                                        | >1 kg    | 8 trials      | 408                 | 0.03 (-0.08, 0.14)   | 0.62                 | 0.06                |                            |
| Fat mass in childhood (kg)             | ≤1 kg    | 2 trials      | 44                  | 0.95 (-0.52, 2.43)   | 0.20                 | 0.07                | 0.23                       |
|                                        | >1 kg    | 2 trials      | 200                 | -0.05 (-0.74, 0.64)  | 0.88                 | 0.96                |                            |
|                                        | ≤1 kg    | 2 trials      | 10                  | 0.68 (-1.94, 3.30)   | 0.61                 | N/A                 | 0.73                       |

| Outcome                                            | Subgroup | No. of trials | No. of participants | aMD (95% CI)         | P for overall effect | P for heterogeneity | P for subgroup interaction |
|----------------------------------------------------|----------|---------------|---------------------|----------------------|----------------------|---------------------|----------------------------|
| Fat mass in adolescence (kg)                       | >1 kg    | 2 trials      | 88                  | -0.79 (-8.56, 6.98)  | 0.84                 | 0.11                |                            |
| Fat mass at >3 years (kg)                          | ≤1 kg    | 4 trials      | 54                  | 0.59 (-1.48, 2.66)   | 0.58                 | 0.30                | 0.70                       |
|                                                    | >1 kg    | 4 trials      | 288                 | 0.14 (-0.75, 1.03)   | 0.75                 | 0.11                |                            |
| Fat mass index in infancy (kg/m <sup>2</sup> )     | ≤1 kg    | 8 trials      | 160                 | -0.20 (-0.58, 0.19)  | 0.32                 | 0.90                | 0.28                       |
|                                                    | >1 kg    | 8 trials      | 406                 | 0.06 (-0.19, 0.30)   | 0.65                 | 0.03                |                            |
| Fat mass index in childhood (kg/m <sup>2</sup> )   | ≤1 kg    | 2 trials      | 44                  | 0.74 (-0.28, 1.75)   | 0.15                 | 0.03                | 0.17                       |
|                                                    | >1 kg    | 2 trials      | 200                 | -0.04 (-0.52, 0.43)  | 0.86                 | 0.98                |                            |
| Fat mass index in adolescence (kg/m <sup>2</sup> ) | ≤1 kg    | 2 trials      | 10                  | -0.79 (-4.11, 2.52)  | 0.64                 | N/A                 | 0.47                       |
|                                                    | >1 kg    | 2 trials      | 88                  | 0.48 (-0.65, 1.60)   | 0.40                 | 0.04                |                            |
| Fat mass index at >3 years (kg/m <sup>2</sup> )    | ≤1 kg    | 4 trials      | 54                  | 0.46 (-0.62, 1.54)   | 0.40                 | 0.11                | 0.54                       |
|                                                    | >1 kg    | 4 trials      | 288                 | 0.09 (-0.37, 0.56)   | 0.69                 | 0.06                |                            |
| Percent fat mass in infancy (%)                    | ≤1 kg    | 8 trials      | 161                 | -1.27 (-3.31, 0.76)  | 0.22                 | 0.96                | 0.38                       |
|                                                    | >1 kg    | 8 trials      | 406                 | -0.20 (-1.48, 1.08)  | 0.76                 | 0.04                |                            |
| Percent fat mass in childhood (%)                  | ≤1 kg    | 2 trials      | 44                  | 4.16 (-1.82, 10.14)  | 0.17                 | 0.03                | 0.20                       |
|                                                    | >1 kg    | 2 trials      | 200                 | -0.15 (-2.94, 2.64)  | 0.92                 | 0.94                |                            |
| Percent fat mass in adolescence (%)                | ≤1 kg    | 2 trials      | 10                  | 0.32 (-10.20, 10.84) | 0.95                 | N/A                 | 0.92                       |
|                                                    | >1 kg    | 2 trials      | 88                  | -0.23 (-3.80, 3.33)  | 0.90                 | 0.07                |                            |
| Percent fat mass at >3 years (%)                   | ≤1 kg    | 4 trials      | 54                  | 3.49 (-1.65, 8.62)   | 0.18                 | 0.08                | 0.20                       |
|                                                    | >1 kg    | 4 trials      | 288                 | -0.19 (-2.41, 2.02)  | 0.86                 | 0.55                |                            |
| Lean mass in infancy (kg)                          | ≤1 kg    | 8 trials      | 161                 | 0.11 (-0.17, 0.39)   | 0.43                 | 0.66                | 0.76                       |
|                                                    | >1 kg    | 8 trials      | 408                 | 0.16 (-0.01, 0.33)   | 0.07                 | 0.10                |                            |
| Lean mass in childhood (kg)                        | ≤1 kg    | 2 trials      | 44                  | 0.02 (-1.62, 1.65)   | 0.99                 | 0.93                | 0.64                       |
|                                                    | >1 kg    | 2 trials      | 200                 | -0.41 (-1.17, 0.35)  | 0.29                 | 0.38                |                            |
| Lean mass in adolescence (kg)                      | ≤1 kg    | 2 trials      | 10                  | -4.02 (-10.49, 2.46) | 0.22                 | N/A                 | 0.23                       |
|                                                    | >1 kg    | 2 trials      | 88                  | 0.22 (-1.97, 2.40)   | 0.84                 | 0.59                |                            |
| Lean mass at >3 years (kg)                         | ≤1 kg    | 4 trials      | 54                  | -0.77 (-2.69, 1.14)  | 0.43                 | 0.37                | 0.63                       |
|                                                    | >1 kg    | 4 trials      | 288                 | -0.27 (-1.09, 0.56)  | 0.53                 | 0.65                |                            |
| Lean mass index in infancy (kg/m <sup>2</sup> )    | ≤1 kg    | 8 trials      | 160                 | 0.05 (-0.40, 0.51)   | 0.82                 | 0.52                | 0.43                       |
|                                                    | >1 kg    | 8 trials      | 406                 | 0.27 (-0.02, 0.55)   | 0.07                 | 0.37                |                            |
|                                                    | ≤1 kg    | 2 trials      | 44                  | 0.37 (-0.54, 1.28)   | 0.42                 | 0.15                | 0.91                       |

[illegible]

**Table S5. Subgroup analyses of gestational age of infant at birth**

| Outcome                     | Subgroup       | No. of trials | No. of participants | aMD (95% CI)         | P for overall effect | P for heterogeneity | P for subgroup interaction |
|-----------------------------|----------------|---------------|---------------------|----------------------|----------------------|---------------------|----------------------------|
| BMI                         |                |               |                     |                      |                      |                     |                            |
| BMI in childhood (kg/m²)    | ≤28 weeks      | 3 trials      | 121                 | 0.62 (-0.03, 1.26)   | 0.06                 | 0.15                | 0.01                       |
|                             | 29 to 32 weeks | 3 trials      | 187                 | -0.46 (-0.93, 0.01)  | 0.06                 | <.0001              |                            |
|                             | 33 to 36 weeks | 2 trials      | 25                  | -0.84 (-1.91, 0.23)  | 0.51                 | 0.13                |                            |
| BMI in infancy (kg/m²)      | ≤28 weeks      | 17 trials     | 651                 | 0.17 (-0.06, 0.40)   | 0.14                 | 0.51                | 0.16                       |
|                             | 29 to 32 weeks | 15 trials     | 936                 | -0.08 (-0.26, 0.11)  | 0.42                 | 0.02                |                            |
|                             | 33 to 36 weeks | 7 trials      | 161                 | 0.26 (-0.16, 0.68)   | 0.23                 | 0.43                |                            |
| BMI in toddlers (kg/m²)     | ≤28 weeks      | 9 trials      | 317                 | 0.19 (-0.10, 0.48)   | 0.20                 | 0.51                | 0.01                       |
|                             | 29 to 32 weeks | 9 trials      | 537                 | -0.29 (-0.51, -0.07) | 0.01                 | 0.03                |                            |
|                             | 33 to 36 weeks | 6 trials      | 103                 | 0.15 (-0.22, 0.52)   | 0.43                 | 0.69                |                            |
| BMI in adolescence (kg/m²)  | ≤28 weeks      | 2 trials      | 17                  | -2.07 (-5.44, 1.30)  | 0.21                 | 0.62                | 0.25                       |
|                             | 29 to 32 weeks | 2 trials      | 70                  | 0.27 (-1.52, 2.06)   | 0.76                 | 0.006               |                            |
|                             | 33 to 36 weeks | 2 trials      | 16                  | 2.81 (-1.16, 6.78)   | 0.15                 | 0.36                |                            |
| BMI at >3 years (kg/m²)     | ≤28 weeks      | 5 trials      | 138                 | 0.33 (-0.35, 1.01)   | 0.34                 | 0.04                | 0.44                       |
|                             | 29 to 32 weeks | 5 trials      | 257                 | -0.26 (-0.85, 0.32)  | 0.30                 | <.0001              |                            |
|                             | 33 to 36 weeks | 4 trials      | 41                  | 0.12 (-1.46, 1.70)   | 0.78                 | 0.04                |                            |
| BMI z-scores in infancy     | ≤28 weeks      | 17 trials     | 651                 | 0.11 (-0.06, 0.27)   | 0.20                 | 0.61                | 0.50                       |
|                             | 29 to 32 weeks | 15 trials     | 936                 | -0.04 (-0.17, 0.10)  | 0.60                 | 0.01                |                            |
|                             | 33 to 36 weeks | 7 trials      | 161                 | 0.15 (-0.18, 0.48)   | 0.38                 | 0.48                |                            |
| BMI z-scores in toddlers    | ≤28 weeks      | 9 trials      | 317                 | 0.10 (-0.12, 0.32)   | 0.35                 | 0.49                | 0.01                       |
|                             | 29 to 32 weeks | 9 trials      | 537                 | -0.23 (-0.40, -0.07) | 0.006                | 0.04                |                            |
|                             | 33 to 36 weeks | 6 trials      | 103                 | 0.12 (-0.17, 0.42)   | 0.41                 | 0.84                |                            |
| BMI z-scores in childhood   | ≤28 weeks      | 3 trials      | 121                 | 0.38 (-0.03, 0.79)   | 0.06                 | 0.01                | 0.01                       |
|                             | 29 to 32 weeks | 3 trials      | 187                 | -0.33 (-0.62, -0.03) | 0.03                 | <.0001              |                            |
|                             | 33 to 36 weeks | 2 trials      | 25                  | -0.63 (-1.34, 0.09)  | 0.08                 | 0.09                |                            |
| BMI z-scores in adolescence | ≤28 weeks      | 2 trials      | 17                  | 0.83 (-1.00, 2.67)   | 0.34                 | 0.34                | 0.56                       |
|                             | 29 to 32 weeks | 2 trials      | 70                  | -0.08 (-0.71, 0.55)  | 0.80                 | 0.002               |                            |
|                             | 33 to 36 weeks | 2 trials      | 16                  | -0.51 (-1.89, 0.87)  | 0.44                 | 0.51                |                            |
| BMI z-scores at >3 years    | ≤28 weeks      | 5 trials      | 138                 | 0.27 (-0.11, 0.66)   | 0.27                 | 0.13                | 0.10                       |
|                             | 29 to 32 weeks | 5 trials      | 257                 | -0.26 (-0.54, 0.01)  | 0.06                 | <.0001              |                            |
|                             | 33 to 36 weeks | 4 trials      | 41                  | 0.34 (-0.82, 0.55)   | 0.69                 | 0.05                |                            |
| Weight                      |                |               |                     |                      |                      |                     |                            |
| Weight in infancy (kg)      | ≤28 weeks      | 17 trials     | 672                 | 0.11 (-0.09, 0.31)   | 0.29                 | 0.06                | 0.86                       |
|                             | 29 to 32 weeks | 15 trials     | 939                 | 0.03 (-0.13, 0.18)   | 0.76                 | 0.06                |                            |
|                             | 33 to 36 weeks | 7 trials      | 161                 | 0.13 (-0.20, 0.45)   | 0.44                 | 0.68                |                            |
|                             | ≤28 weeks      | 9 trials      | 323                 | -0.02 (-0.32, 0.29)  | 0.91                 | 0.71                | 0.16                       |

| Outcome                      | Subgroup       | No. of trials | No. of participants | aMD (95% CI)         | P for overall effect | P for heterogeneity | P for subgroup interaction |
|------------------------------|----------------|---------------|---------------------|----------------------|----------------------|---------------------|----------------------------|
| Weight in toddlers (kg)      | 29 to 32 weeks | 9 trials      | 540                 | -0.14 (-0.38, 0.10)  | 0.24                 | 0.70                |                            |
|                              | 33 to 36 weeks | 6 trials      | 104                 | 0.38 (-0.043, 0.81)  | 0.08                 | 0.78                |                            |
| Weight in childhood (kg)     | ≤28 weeks      | 3 trials      | 121                 | 0.45 (-0.93, 1.83)   | 0.52                 | 0.21                | 0.22                       |
|                              | 29 to 32 weeks | 3 trials      | 187                 | -0.95 (-1.92, 0.01)  | 0.05                 | 0.0001              |                            |
|                              | 33 to 36 weeks | 1 trial       | 24                  | -1.60 (-4.18, 0.99)  | 0.21                 | N/A                 |                            |
| Weight in adolescence (kg)   | ≤28 weeks      | 2 trials      | 17                  | -5.34 (-15.00, 4.33) | 0.25                 | 0.75                | 0.24                       |
|                              | 29 to 32 weeks | 2 trials      | 70                  | 0.15 (-0.489, 5.18)  | 0.95                 | 0.06                |                            |
|                              | 33 to 36 weeks | 2 trials      | 16                  | 10.03 (-4.88, 24.94) | 0.17                 | N/A                 |                            |
| Weight at >3 years (kg)      | ≤28 weeks      | 5 trials      | 138                 | -0.17 (-1.72, 1.39)  | 0.83                 | 0.10                | 0.57                       |
|                              | 29 to 32 weeks | 5 trials      | 257                 | -0.66 (-2.16, 0.84)  | 0.39                 | 0.001               |                            |
|                              | 33 to 36 weeks | 3 trials      | 40                  | 0.80 (-4.27, 5.87)   | 0.75                 | 0.15                |                            |
| Weight z-scores in infancy   | ≤28 weeks      | 17 trials     | 672                 | 0.07 (-0.10, 0.23)   | 0.44                 | 0.10                | 0.87                       |
|                              | 29 to 32 weeks | 15 trials     | 939                 | 0.03 (-0.11, 0.17)   | 0.70                 | 0.02                |                            |
|                              | 33 to 36 weeks | 7 trials      | 161                 | 0.13 (-0.17, 0.44)   | 0.39                 | 0.80                |                            |
| Weight z-scores in toddlers  | ≤28 weeks      | 9 trials      | 323                 | 0.05 (-0.17, 0.27)   | 0.68                 | 0.78                | 0.70                       |
|                              | 29 to 32 weeks | 9 trials      | 540                 | -0.10 (-0.26, 0.07)  | 0.25                 | 0.07                |                            |
|                              | 33 to 36 weeks | 6 trials      | 104                 | 0.22 (-0.08, 0.51)   | 0.14                 | 0.89                |                            |
| Weight z-scores in childhood | ≤28 weeks      | 3 trials      | 119                 | 0.09 (-0.30, 0.48)   | 0.64                 | 0.12                | 0.09                       |
|                              | 29 to 32 weeks | 3 trials      | 187                 | -0.29 (-0.57, -0.01) | 0.04                 | 0.003               |                            |
|                              | 33 to 36 weeks | 1 trial       | 24                  | -1.01 (-1.81, -0.21) | 0.02                 | N/A                 |                            |
| Length/ height               |                |               |                     |                      |                      |                     |                            |
| Length in infancy (cm)       | ≤28 weeks      | 17 trials     | 651                 | 0.20 (-0.48, 0.88)   | 0.57                 | 0.02                | 0.94                       |
|                              | 29 to 32 weeks | 15 trials     | 936                 | 0.26 (-0.26, 0.77)   | 0.33                 | 0.62                |                            |
|                              | 33 to 36 weeks | 7 trials      | 161                 | 0.15 (-0.94, 1.23)   | 0.79                 | 0.65                |                            |
| Height in toddlers (cm)      | ≤28 weeks      | 9 trials      | 318                 | -0.55 (-1.46, 0.35)  | 0.23                 | 0.66                | 0.25                       |
|                              | 29 to 32 weeks | 9 trials      | 538                 | 0.18 (-0.49, 0.85)   | 0.60                 | 0.34                |                            |
|                              | 33 to 36 weeks | 6 trials      | 103                 | 1.05 (-0.24, 2.34)   | 0.11                 | 0.52                |                            |
| Height in childhood (cm)     | ≤28 weeks      | 3 trials      | 121                 | -1.45 (-3.40, 0.51)  | 0.15                 | 0.71                | 0.78                       |
|                              | 29 to 32 weeks | 3 trials      | 188                 | -0.92 (-2.55, 0.71)  | 0.27                 | 0.33                |                            |
|                              | 33 to 36 weeks | 1 trial       | 24                  | -1.00 (-4.93, 2.93)  | 0.61                 | N/A                 |                            |
| Height in adolescence (cm)   | ≤28 weeks      | 2 trials      | 17                  | -1.38 (-8.92, 6.17)  | 0.70                 | 0.83                | 0.67                       |
|                              | 29 to 32 weeks | 2 trials      | 70                  | -1.12 (-5.73, 3.49)  | 0.63                 | 0.77                |                            |
|                              | 33 to 36 weeks | 2 trials      | 16                  | -0.95 (-10.76, 8.86) | 0.84                 | N/A                 |                            |
| Height at >3 years (cm)      | ≤28 weeks      | 5 trials      | 138                 | -1.45 (-3.40, 0.51)  | 0.15                 | 0.93                | 0.85                       |
|                              | 29 to 32 weeks | 5 trials      | 258                 | -0.92 (-2.55, 0.71)  | 0.27                 | 0.81                |                            |
|                              | 33 to 36 weeks | 3 trials      | 40                  | -1.00 (-4.93, 2.92)  | 0.61                 | 0.73                |                            |
|                              | ≤28 weeks      | 17 trials     | 651                 | 0.002 (-0.19, 0.19)  | 0.98                 | 0.08                | 0.77                       |
|                              | 29 to 32 weeks | 15 trials     | 936                 | 0.08 (-0.08, 0.23)   | 0.34                 | 0.17                |                            |

| Outcome                                | Subgroup       | No. of trials | No. of participants | aMD (95% CI)         | P for overall effect | P for heterogeneity | P for subgroup interaction |
|----------------------------------------|----------------|---------------|---------------------|----------------------|----------------------|---------------------|----------------------------|
| Length z-scores in infancy             | 33 to 36 weeks | 7 trials      | 161                 | 0.06 (-0.28, 0.40)   | 0.72                 | 0.57                |                            |
| Height z-scores in toddlers            | ≤28 weeks      | 9 trials      | 318                 | -0.06 (-0.31, 0.19)  | 0.64                 | 0.76                | 0.38                       |
|                                        | 29 to 32 weeks | 9 trials      | 538                 | 0.11 (-0.07, 0.29)   | 0.25                 | 0.11                |                            |
|                                        | 33 to 36 weeks | 6 trials      | 103                 | 0.22 (-0.11, 0.54)   | 0.20                 | 0.82                |                            |
| Height z-scores in childhood           | ≤28 weeks      | 3 trials      | 121                 | -0.20 (-0.54, 0.14)  | 0.25                 | 0.24                | 0.45                       |
|                                        | 29 to 32 weeks | 3 trials      | 188                 | -0.15 (-0.42, 0.13)  | 0.29                 | 0.70                |                            |
|                                        | 33 to 36 weeks | 1 trial       | 24                  | -0.83 (-1.57, -0.09) | 0.03                 | N/A                 |                            |
| Height z-scores in adolescence         | ≤28 weeks      | 2 trials      | 17                  | -0.03 (-0.84, 0.78)  | 0.95                 | 0.97                | 0.99                       |
|                                        | 29 to 32 weeks | 2 trials      | 70                  | -0.02 (-0.55, 0.51)  | 0.94                 | 0.43                |                            |
|                                        | 33 to 36 weeks | 2 trials      | 16                  | 0.04 (-0.96, 1.02)   | 0.94                 | N/A                 |                            |
| Height z-scores at >3 years            | ≤28 weeks      | 5 trials      | 138                 | -0.18 (-0.49, 0.13)  | 0.26                 | 0.53                | 0.53                       |
|                                        | 29 to 32 weeks | 5 trials      | 258                 | -0.11 (-0.35, 0.14)  | 0.39                 | 0.72                |                            |
|                                        | 33 to 36 weeks | 3 trials      | 40                  | -0.56 (-1.12, 0.01)  | 0.05                 | 0.34                |                            |
| Weight for length z-scores in infancy  | ≤28 weeks      | 17 trials     | 651                 | 0.09 (-0.08, 0.26)   | 0.29                 | 0.42                | 0.44                       |
|                                        | 29 to 32 weeks | 15 trials     | 936                 | -0.03 (-0.16, 0.11)  | 0.70                 | 0.007               |                            |
|                                        | 33 to 36 weeks | 7 trials      | 161                 | 0.14 (-0.18, 0.45)   | 0.40                 | 0.52                |                            |
| Weight for length z-scores in toddlers | ≤28 weeks      | 9 trials      | 317                 | 0.09 (-0.13, 0.31)   | 0.41                 | 0.54                | 0.01                       |
|                                        | 29 to 32 weeks | 9 trials      | 537                 | -0.20 (-0.37, -0.04) | 0.02                 | 0.04                |                            |
|                                        | 33 to 36 weeks | 6 trials      | 103                 | 0.27 (-0.06, 0.59)   | 0.11                 | 0.77                |                            |
| HC                                     |                |               |                     |                      |                      |                     |                            |
| HC in infancy (cm)                     | ≤28 weeks      | 17 trials     | 675                 | -0.10 (-0.42, 0.23)  | 0.56                 | 0.60                | 0.78                       |
|                                        | 29 to 32 weeks | 15 trials     | 939                 | 0.002 (-0.26, 0.26)  | 0.99                 | 0.05                |                            |
|                                        | 33 to 36 weeks | 7 trials      | 160                 | -0.10 (-0.66, 0.46)  | 0.73                 | 0.31                |                            |
| HC in toddlers (cm)                    | ≤28 weeks      | 10 trials     | 370                 | -0.31 (-0.68, 0.05)  | 0.09                 | 0.65                | 0.74                       |
|                                        | 29 to 32 weeks | 9 trials      | 515                 | -0.20 (-0.47, 0.07)  | 0.15                 | 0.85                |                            |
|                                        | 33 to 36 weeks | 5 trials      | 102                 | -0.03 (-0.57, 0.52)  | 0.92                 | 0.78                |                            |
| HC in childhood (cm)                   | ≤28 weeks      | 3 trials      | 111                 | -0.14 (-0.85, 0.56)  | 0.69                 | 0.46                | 0.59                       |
|                                        | 29 to 32 weeks | 3 trials      | 181                 | -0.35 (-0.78, 0.09)  | 0.12                 | 0.80                |                            |
|                                        | 33 to 36 weeks | 1 trial       | 24                  | 0.03(-0.99, 1.05)    | 0.95                 | N/A                 |                            |
| HC z-scores in infancy                 | ≤28 weeks      | 17 trials     | 675                 | -0.05 (-0.23, 0.13)  | 0.60                 | 0.48                | 0.79                       |
|                                        | 29 to 32 weeks | 15 trials     | 939                 | 0.006 (-0.15, 0.17)  | 0.94                 | 0.03                |                            |
|                                        | 33 to 36 weeks | 7 trials      | 160                 | -0.09 (-0.44, 0.27)  | 0.63                 | 0.12                |                            |
| HC z-scores in toddlers                | ≤28 weeks      | 10 trials     | 370                 | -0.22 (-0.48, 0.04)  | 0.09                 | 0.81                | 0.79                       |
|                                        | 29 to 32 weeks | 9 trials      | 515                 | -0.13 (-0.33, 0.06)  | 0.17                 | 0.74                |                            |
|                                        | 33 to 36 weeks | 5 trials      | 102                 | -0.07 (-0.44, 0.30)  | 0.71                 | 0.89                |                            |
| Body composition                       |                |               |                     |                      |                      |                     |                            |

| Outcome                                            | Subgroup       | No. of trials | No. of participants | aMD (95% CI)         | P for overall effect | P for heterogeneity | P for subgroup interaction |
|----------------------------------------------------|----------------|---------------|---------------------|----------------------|----------------------|---------------------|----------------------------|
| Fat mass in infancy (kg)                           | ≤28 weeks      | 8 trials      | 247                 | -0.03 (-0.18, 0.12)  | 0.69                 | 0.62                | 0.63                       |
|                                                    | 29 to 32 weeks | 7 trials      | 303                 | 0.01 (-0.12, 0.14)   | 0.87                 | 0.01                |                            |
|                                                    | 33 to 36 weeks | 2 trials      | 19                  | 0.26 (-0.33, 0.85)   | 0.36                 | 0.21                |                            |
| Fat mass in childhood (kg)                         | ≤28 weeks      | 2 trials      | 76                  | 0.79 (-0.16, 1.75)   | 0.10                 | 0.03                | 0.24                       |
|                                                    | 29 to 32 weeks | 2 trials      | 146                 | -0.34 (-1.20, 0.52)  | 0.43                 | 0.89                |                            |
|                                                    | 33 to 36 weeks | 1 trial       | 22                  | 0.47(-1.96, 2.89)    | 0.69                 | N/A                 |                            |
| Fat mass in adolescence (kg)                       | ≤28 weeks      | 2 trials      | 16                  | 0.21 (-1.05, 1.47)   | 0.74                 | 0.73                | 0.32                       |
|                                                    | 29 to 32 weeks | 2 trials      | 66                  | -0.06 (-1.17, 1.05)  | 0.92                 | 0.03                |                            |
|                                                    | 33 to 36 weeks | 2 trials      | 16                  | 1.61 (-1.38, 4.59)   | 0.28                 | N/A                 |                            |
| Fat mass at >3 years (kg)                          | ≤28 weeks      | 4 trials      | 92                  | 0.21 (-1.05, 1.47)   | 0.74                 | 0.06                | 0.43                       |
|                                                    | 29 to 32 weeks | 4 trials      | 212                 | -0.06 (-1.17, 1.05)  | 0.92                 | 0.004               |                            |
|                                                    | 33 to 36 weeks | 3 trials      | 38                  | 1.61 (-1.38, 4.59)   | 0.28                 | 0.23                |                            |
| Fat mass index in infancy (kg/m <sup>2</sup> )     | ≤28 weeks      | 8 trials      | 246                 | -0.18 (-0.50, 0.14)  | 0.27                 | 0.71                | 0.36                       |
|                                                    | 29 to 32 weeks | 7 trials      | 301                 | 0.06 (-0.22, 0.33)   | 0.69                 | 0.004               |                            |
|                                                    | 33 to 36 weeks | 2 trials      | 19                  | 0.63 (-1.09, 2.35)   | 0.44                 | 0.19                |                            |
| Fat mass index in childhood (kg/m <sup>2</sup> )   | ≤28 weeks      | 2 trials      | 76                  | 0.55 (-0.05, 1.15)   | 0.07                 | 0.02                | 0.21                       |
|                                                    | 29 to 32 weeks | 2 trials      | 146                 | -0.25 (-0.84, 0.34)  | 0.41                 | 0.84                |                            |
|                                                    | 33 to 36 weeks | 1 trial       | 22                  | 0.49 (-1.49, 2.46)   | 0.61                 | N/A                 |                            |
| Fat mass index in adolescence (kg/m <sup>2</sup> ) | ≤28 weeks      | 2 trials      | 16                  | -0.48 (-2.78, 1.83)  | 0.66                 | 0.69                | 0.58                       |
|                                                    | 29 to 32 weeks | 2 trials      | 66                  | 0.27 (-1.13, 1.66)   | 0.70                 | 0.009               |                            |
|                                                    | 33 to 36 weeks | 2 trials      | 16                  | 1.30 (-1.13, 3.73)   | 0.26                 | N/A                 |                            |
| Fat mass index at >3 years (kg/m <sup>2</sup> )    | ≤28 weeks      | 4 trials      | 92                  | 0.40 (-0.20, 1.01)   | 0.19                 | 0.10                | 0.37                       |
|                                                    | 29 to 32 weeks | 4 trials      | 212                 | -0.08 (-0.67, 0.51)  | 0.78                 | 0.006               |                            |
|                                                    | 33 to 36 weeks | 3 trials      | 38                  | 0.77 (-0.72, 2.26)   | 0.30                 | 0.46                |                            |
| Percent fat mass in infancy (%)                    | ≤28 weeks      | 8 trials      | 247                 | -1.45 (-3.05, 0.16)  | 0.08                 | 0.87                | 0.11                       |
|                                                    | 29 to 32 weeks | 7 trials      | 301                 | -0.21 (-1.69, 1.27)  | 0.78                 | 0.001               |                            |
|                                                    | 33 to 36 weeks | 2 trials      | 19                  | 5.58 (-5.01, 16.17)  | 0.28                 | 0.21                |                            |
| Percent fat mass in childhood (%)                  | ≤28 weeks      | 2 trials      | 76                  | 3.10 (-0.20, 6.39)   | 0.07                 | 0.03                | 0.14                       |
|                                                    | 29 to 32 weeks | 2 trials      | 146                 | -1.58 (-4.92, 1.77)  | 0.35                 | 0.74                |                            |
|                                                    | 33 to 36 weeks | 1 trial       | 22                  | 5.19 (-9.37, 19.74)  | 0.46                 | N/A                 |                            |
| Percent fat mass in adolescence (%)                | ≤28 weeks      | 2 trials      | 16                  | -2.64 (-11.68, 6.41) | 0.54                 | 0.81                | 0.71                       |
|                                                    | 29 to 32 weeks | 2 trials      | 66                  | -0.33 (-4.67, 4.00)  | 0.88                 | 0.02                |                            |
|                                                    | 33 to 36 weeks | 2 trials      | 16                  | 1.49 (-5.89, 8.87)   | 0.67                 | N/A                 |                            |
| Percent fat mass at >3 years (%)                   | ≤28 weeks      | 4 trials      | 92                  | 2.25 (-0.80, 5.31)   | 0.15                 | 0.09                | 0.19                       |
|                                                    | 29 to 32 weeks | 4 trials      | 212                 | -1.17 (-3.82, 1.48)  | 0.38                 | 0.17                |                            |
|                                                    | 33 to 36 weeks | 3 trials      | 38                  | 3.96 (-5.09, 13.01)  | 0.38                 | 0.88                |                            |
|                                                    | ≤28 weeks      | 8 trials      | 247                 | 0.23 (-0.03, 0.49)   | 0.08                 | 0.49                | 0.60                       |



| Outcome                                | Subgroup       | No. of trials | No. of participants | aMD (95% CI)             | P for overall effect | P for heterogeneity | P for subgroup interaction |
|----------------------------------------|----------------|---------------|---------------------|--------------------------|----------------------|---------------------|----------------------------|
| Lean mass in infancy (kg)              | 29 to 32 weeks | 7 trials      | 303                 | 0.08 (-0.10, 0.25)       | 0.39                 | 0.22                |                            |
|                                        | 33 to 36 weeks | 2 trials      | 19                  | 0.06 (-0.76, 0.89)       | 0.87                 | 0.67                |                            |
| Lean mass in childhood (kg)            | ≤28 weeks      | 2 trials      | 76                  | -0.33 (-1.31, 0.65)      | 0.51                 | 0.10                | 0.49                       |
|                                        | 29 to 32 weeks | 2 trials      | 146                 | -0.09 (-1.00, 0.82)      | 0.84                 | 0.43                |                            |
|                                        | 33 to 36 weeks | 1 trial       | 22                  | -1.97 (-5.49, 1.55)      | 0.25                 | N/A                 |                            |
| Lean mass in adolescence (kg)          | ≤28 weeks      | 2 trials      | 16                  | -1.50 (-5.37, 2.36)      | 0.41                 | 0.56                | 0.29                       |
|                                        | 29 to 32 weeks | 2 trials      | 66                  | -0.63 (-3.23, 1.97)      | 0.63                 | 0.28                |                            |
|                                        | 33 to 36 weeks | 2 trials      | 16                  | 3.37 (-4.87, 11.61)      | 0.39                 | N/A                 |                            |
| Lean mass at >3 years (kg)             | ≤28 weeks      | 4 trials      | 92                  | -0.54 (-1.51, 0.44)      | 0.28                 | 0.21                | 0.92                       |
|                                        | 29 to 32 weeks | 4 trials      | 212                 | -0.29 (-1.30, 0.71)      | 0.57                 | 0.40                |                            |
|                                        | 33 to 36 weeks | 3 trials      | 38                  | -0.49 (-3.91, 2.92)      | 0.77                 | 0.29                |                            |
| Lean mass index in infancy (kg/m²)     | ≤28 weeks      | 8 trials      | 246                 | 0.30 (-0.05, 0.64)       | 0.09                 | 0.77                | 0.71                       |
|                                        | 29 to 32 weeks | 7 trials      | 301                 | 0.12 (-0.21, 0.44)       | 0.48                 | 0.27                |                            |
|                                        | 33 to 36 weeks | 2 trials      | 19                  | -0.15 (-2.85, 2.55)      | 0.91                 | 0.66                |                            |
| Lean mass index in childhood (kg/m²)   | ≤28 weeks      | 2 trials      | 76                  | -0.17 (-0.64, 0.29)      | 0.47                 | 0.05                | 0.13                       |
|                                        | 29 to 32 weeks | 2 trials      | 146                 | 0.01 (-0.49, 0.52)       | 0.96                 | 0.20                |                            |
|                                        | 33 to 36 weeks | 1 trial       | 22                  | -1.54 (-3.76, 0.69)      | 0.17                 | N/A                 |                            |
| Lean mass index in adolescence (kg/m²) | ≤28 weeks      | 2 trials      | 16                  | -0.47 (-1.61, 0.67)      | 0.38                 | 0.32                | 0.48                       |
|                                        | 29 to 32 weeks | 2 trials      | 66                  | -0.29 (-1.27, 0.69)      | 0.56                 | 0.02                |                            |
|                                        | 33 to 36 weeks | 2 trials      | 16                  | 1.50 (-0.42, 3.41)       | 0.11                 | N/A                 |                            |
| Lean mass index at >3 years (kg/m²)    | ≤28 weeks      | 4 trials      | 92                  | -0.25 (-0.66, 0.18)      | 0.25                 | 0.10                | 0.75                       |
|                                        | 29 to 32 weeks | 4 trials      | 212                 | -0.09 (-0.55, 0.37)      | 0.69                 | 0.02                |                            |
|                                        | 33 to 36 weeks | 3 trials      | 38                  | -0.45 (-2.00, 1.09)      | 0.55                 | 0.15                |                            |
| Bone development                       |                |               |                     |                          |                      |                     |                            |
| BMC in infancy (g)                     | ≤28 weeks      | 6 trials      | 153                 | 15.04 (-0.40, 30.49)     | 0.06                 | 0.62                | 0.50                       |
|                                        | 29 to 32 weeks | 5 trials      | 141                 | 4.71 (-9.16, 18.59)      | 0.50                 | 0.45                |                            |
|                                        | 33 to 36 weeks | 2 trials      | 19                  | 6.95 (-16.57, 30.47)     | 0.54                 | 0.67                |                            |
| BMC in adolescence (g)                 | ≤28 weeks      | 2 trials      | 16                  | -58.61 (-281.74, 164.52) | 0.58                 | 0.54                | 0.50                       |
|                                        | 29 to 32 weeks | 2 trials      | 66                  | 65.64 (-173.23, 89.29)   | 0.53                 | 0.70                |                            |
|                                        | 33 to 36 weeks | 2 trials      | 16                  | -25.73 (-348.42, 296.97) | 0.86                 | N/A                 |                            |
| BMD in infancy                         | ≤28 weeks      | 5 trials      | 137                 | 0.007 (-0.006, 0.021)    | 0.27                 | 0.69                | 0.96                       |

| Outcome            | Subgroup       | No. of trials | No. of participants | aMD (95% CI)           | P for overall effect | P for heterogeneity | P for subgroup interaction |
|--------------------|----------------|---------------|---------------------|------------------------|----------------------|---------------------|----------------------------|
|                    | 29 to 32 weeks | 4 trials      | 111                 | 0.006 (-0.009, 0.021)  | 0.42                 | 0.21                |                            |
|                    | 33 to 36 weeks | 2 trials      | 19                  | 0.010 (-0.029, 0.048)  | 0.61                 | 0.95                |                            |
| BMD in adolescence | ≤28 weeks      | 2 trials      | 16                  | -0.040 (-0.121, 0.042) | 0.31                 | 0.18                | 0.83                       |
|                    | 29 to 32 weeks | 2 trials      | 66                  | -0.006 (-0.041, 0.029) | 0.72                 | 0.80                |                            |
|                    | 33 to 36 weeks | 2 trials      | 16                  | -0.050 (-0.141, 0.040) | 0.25                 | N/A                 |                            |

Abbreviation: BMI: body mass index; HC: head circumference; BMC: bone mineral content; BMD: bone mineral density; aMD: adjusted mean difference; N/A: not applicable. Mean differences were adjusted for sex and birthweight z-scores.

**Table S6.** Subgroup analyses of timing of supplements.

| Outcome                                 | Subgroup       | No. of trials | No. of participants | aMD (95% CI)         | P for overall effect | P for heterogeneity | P for subgroup interaction |
|-----------------------------------------|----------------|---------------|---------------------|----------------------|----------------------|---------------------|----------------------------|
| <b>BMI</b>                              |                |               |                     |                      |                      |                     |                            |
| BMI in childhood (kg/m <sup>2</sup> )   | In hospital    | 1 trial       | 55                  | -0.61 (-1.80, 0.57)  | 0.30                 | N/A                 | 0.23                       |
|                                         | Post discharge | 2 trials      | 278                 | -0.01 (-0.37, 0.35)  | 0.97                 | 0.46                |                            |
| BMI in infancy (kg/m <sup>2</sup> )     | In hospital    | 9 trials      | 622                 | 0.02 (-0.21, 0.25)   | 0.89                 | 0.88                | 0.93                       |
|                                         | Post discharge | 11 trials     | 1386                | 0.03 (-0.12, 0.18)   | 0.70                 | 0.13                |                            |
| BMI in toddlers (kg/m <sup>2</sup> )    | In hospital    | 5 trials      | 402                 | -0.06 (-0.31, 0.19)  | 0.64                 | 0.81                | 0.91                       |
|                                         | Post discharge | 5 trials      | 792                 | -0.08 (-0.25, 0.10)  | 0.40                 | 0.36                |                            |
| BMI in adolescence (kg/m <sup>2</sup> ) | In hospital    | 1 trial       | 36                  | -2.49 (-4.51, -0.48) | 0.02                 | N/A                 | 0.02                       |
|                                         | Post discharge | 1 trial       | 67                  | 1.40 (-0.48, 3.27)   | 0.14                 | N/A                 |                            |
| BMI at >3 years (kg/m <sup>2</sup> )    | In hospital    | 2 trials      | 91                  | -1.17 (-2.25, -0.10) | 0.03                 | 0.18                | 0.01                       |
|                                         | Post discharge | 3 trials      | 345                 | 0.26 (-0.20, 0.71)   | 0.27                 | 0.06                |                            |
| BMI z-scores in infancy                 | In hospital    | 9 trials      | 622                 | -0.008 (-0.17, 0.16) | 0.92                 | 0.96                | 0.70                       |
|                                         | Post discharge | 11 trials     | 1386                | 0.03 (-0.08, 0.14)   | 0.59                 | 0.07                |                            |
| BMI z-scores in toddlers                | In hospital    | 5 trials      | 402                 | -0.07 (-0.25, 0.12)  | 0.48                 | 0.77                | 0.94                       |
|                                         | Post discharge | 5 trials      | 792                 | -0.08 (-0.21, 0.06)  | 0.26                 | 0.43                |                            |
| BMI z-scores in childhood               | In hospital    | 1 trial       | 55                  | -0.29 (-1.01, 0.43)  | 0.43                 | N/A                 | 0.48                       |
|                                         | Post discharge | 2 trials      | 278                 | -0.06 (-0.29, 0.18)  | 0.63                 | 0.51                |                            |

| Outcome                      | Subgroup       | No. of trials | No. of participants | aMD (95% CI)         | P for overall effect | P for heterogeneity | P for subgroup interaction |
|------------------------------|----------------|---------------|---------------------|----------------------|----------------------|---------------------|----------------------------|
| BMI z-scores in adolescence  | In hospital    | 1 trial       | 36                  | -1.20 (-2.08, -0.31) | 0.01                 | N/A                 | 0.01                       |
|                              | Post discharge | 1 trial       | 67                  | 0.47 (-0.17, 1.11)   | 0.15                 | N/A                 |                            |
| BMI z-scores at >3 years     | In hospital    | 2 trials      | 91                  | -0.55 (-1.11, 0.02)  | 0.06                 | 0.22                | 0.02                       |
|                              | Post discharge | 3 trials      | 345                 | 0.04 (-0.18, 0.26)   | 0.73                 | 0.18                |                            |
| Weight                       |                |               |                     |                      |                      |                     |                            |
| Weight in infancy (kg)       | In hospital    | 9 trials      | 644                 | -0.09 (-0.28, 0.10)  | 0.36                 | 0.63                | 0.03                       |
|                              | Post discharge | 11 trials     | 1388                | 0.18 (0.04, 0.30)    | 0.01                 | 0.004               |                            |
| Weight in toddlers (kg)      | In hospital    | 5 trials      | 408                 | -0.08 (-0.34, 0.17)  | 0.53                 | 0.88                | 0.40                       |
|                              | Post discharge | 5 trials      | 796                 | 0.05 (-0.13, 0.24)   | 0.58                 | 0.53                |                            |
| Weight in childhood (kg)     | In hospital    | 1 trial       | 55                  | -1.74 (-3.61, 0.13)  | 0.07                 | N/A                 | 0.14                       |
|                              | Post discharge | 2 trials      | 278                 | -0.21 (-1.03, 0.61)  | 0.61                 | 0.43                |                            |
| Weight in adolescence (kg)   | In hospital    | 1 trial       | 36                  | -4.58 (-11.46, 2.30) | 0.19                 | N/A                 | 0.11                       |
|                              | Post discharge | 1 trial       | 67                  | 2.31 (-2.59, 7.21)   | 0.35                 | N/A                 |                            |
| Weight at >3 years (kg)      | In hospital    | 2 trials      | 91                  | -2.84 (-5.22, -0.46) | 0.02                 | 0.25                | 0.02                       |
|                              | Post discharge | 3 trials      | 345                 | 0.29 (-0.92, 1.50)   | 0.64                 | 0.19                |                            |
| Weight z-scores in infancy   | In hospital    | 9 trials      | 644                 | -0.02 (-0.18, 0.15)  | 0.85                 | 0.65                | 0.23                       |
|                              | Post discharge | 11 trials     | 1388                | 0.11 (-0.01, 0.22)   | 0.06                 | 0.003               |                            |
| Weight z-scores in toddlers  | In hospital    | 5 trials      | 408                 | -0.09 (-0.27, 0.09)  | 0.33                 | 0.80                | 0.13                       |
|                              | Post discharge | 5 trials      | 796                 | 0.07 (-0.05, 0.22)   | 0.21                 | 0.55                |                            |
| Weight z-scores in childhood | In hospital    | 1 trial       | 53                  | -0.33 (-0.88, 0.23)  | 0.25                 | N/A                 | 0.63                       |
|                              | Post discharge | 2 trials      | 278                 | -0.18 (-0.42, 0.06)  | 0.14                 | 0.74                |                            |
| Length/ height               |                |               |                     |                      |                      |                     |                            |
| Length in infancy (cm)       | In hospital    | 9 trials      | 622                 | -0.38 (-1.01, 0.25)  | 0.23                 | 0.54                | 0.005                      |
|                              | Post discharge | 11 trials     | 1386                | 0.70 (0.27, 1.12)    | 0.001                | 0.009               |                            |
| Height in toddlers (cm)      | In hospital    | 5 trials      | 402                 | -0.16 (-0.89, 0.58)  | 0.68                 | 0.09                | 0.24                       |
|                              | Post discharge | 5 trials      | 796                 | 0.38 (-0.14, 0.90)   | 0.15                 | 0.28                |                            |
| Height in childhood (cm)     | In hospital    | 1 trial       | 55                  | -2.35 (-5.21, 0.51)  | 0.11                 | N/A                 | 0.32                       |
|                              | Post discharge | 2 trials      | 279                 | -0.76 (-2.02, 0.50)  | 0.24                 | 0.73                |                            |
| Height in adolescence (cm)   | In hospital    | 1 trial       | 36                  | -1.90 (-8.05, 4.25)  | 0.54                 | N/A                 | 0.73                       |
|                              | Post discharge | 1 trial       | 67                  | -0.56 (-4.94, 3.82)  | 0.80                 | N/A                 |                            |
| Height at >3 years (cm)      | In hospital    | 2 trials      | 91                  | -2.29 (-4.94, 0.36)  | 0.09                 | 0.96                | 0.30                       |
|                              | Post discharge | 3 trials      | 346                 | -0.73 (-2.07, 0.61)  | 0.29                 | 0.94                |                            |
|                              | In hospital    | 9 trials      | 622                 | -0.04 (-0.23, 0.14)  | 0.66                 | 0.27                | 0.10                       |

| Outcome                                | Subgroup       | No. of trials | No. of participants | aMD (95% CI)         | P for overall effect | P for heterogeneity | P for subgroup interaction |
|----------------------------------------|----------------|---------------|---------------------|----------------------|----------------------|---------------------|----------------------------|
| Length z-scores in infancy             | Post discharge | 11 trials     | 1386                | 0.14 (0.02, 0.27)    | 0.02                 | 0.0024              |                            |
| Height z-scores in toddlers            | In hospital    | 5 trials      | 402                 | -0.07 (-0.28, 0.14)  | 0.50                 | 0.08                | 0.03                       |
|                                        | Post discharge | 5 trials      | 796                 | 0.21 (0.07, 0.36)    | 0.005                | 0.52                |                            |
| Height z-scores in childhood           | In hospital    | 1 trial       | 55                  | 0.03 (-0.48, 0.53)   | 0.92                 | N/A                 | 0.34                       |
|                                        | Post discharge | 2 trials      | 279                 | -0.24 (-0.46, -0.02) | 0.03                 | 0.83                |                            |
| Height z-scores in adolescence         | In hospital    | 1 trial       | 36                  | -0.44 (-1.13, 0.26)  | 0.22                 | N/A                 | 0.19                       |
|                                        | Post discharge | 1 trial       | 67                  | 0.14 (-0.36, 0.63)   | 0.59                 | N/A                 |                            |
| Height z-scores at >3 years            | In hospital    | 2 trials      | 91                  | -0.14 (-0.53, 0.26)  | 0.50                 | 0.33                | 0.89                       |
|                                        | Post discharge | 3 trials      | 346                 | -0.17 (-0.37, 0.04)  | 0.11                 | 0.33                |                            |
| Weight for length z-scores in infancy  | In hospital    | 9 trials      | 622                 | -0.002 (-0.17, 0.16) | 0.98                 | 0.99                | 0.78                       |
|                                        | Post discharge | 11 trials     | 1386                | 0.03 (-0.08, 0.14)   | 0.65                 | 0.06                |                            |
| Weight for length z-scores in toddlers | In hospital    | 5 trials      | 402                 | -0.07 (-0.26, 0.11)  | 0.43                 | 0.95                | 0.68                       |
|                                        | Post discharge | 5 trials      | 796                 | -0.03 (-0.16, 0.11)  | 0.69                 | 0.32                |                            |
| HC                                     |                |               |                     |                      |                      |                     |                            |
| HC in infancy (cm)                     | In hospital    | 9 trials      | 649                 | -0.20 (-0.51, 0.11)  | 0.20                 | 0.35                | 0.12                       |
|                                        | Post discharge | 11 trials     | 1385                | 0.10 (-0.11, 0.31)   | 0.35                 | 0.14                |                            |
| HC in toddlers (cm)                    | In hospital    | 6 trials      | 449                 | -0.14 (-0.44, 0.15)  | 0.34                 | 0.54                | 0.88                       |
|                                        | Post discharge | 5 trials      | 777                 | -0.12 (-0.34, 0.11)  | 0.31                 | 0.21                |                            |
| HC in childhood (cm)                   | In hospital    | 1 trial       | 53                  | 0.12 (-0.77, 1.01)   | 0.79                 | N/A                 | 0.40                       |
|                                        | Post discharge | 2 trials      | 264                 | -0.30 (-0.70, 0.10)  | 0.14                 | 0.63                |                            |
| HC z-scores in infancy                 | In hospital    | 9 trials      | 649                 | -0.009 (-0.19, 0.17) | 0.92                 | 0.29                | 0.96                       |
|                                        | Post discharge | 11 trials     | 1385                | -0.004 (-0.13, 0.12) | 0.96                 | 0.09                |                            |
| HC z-scores in toddlers                | In hospital    | 6 trials      | 449                 | -0.12 (-0.33, 0.09)  | 0.25                 | 0.48                | 0.67                       |
|                                        | Post discharge | 5 trials      | 777                 | -0.07 (-0.22, 0.10)  | 0.43                 | 0.19                |                            |
| Body composition                       |                |               |                     |                      |                      |                     |                            |
| Fat mass in infancy (kg)               | In hospital    | 2 trials      | 84                  | 0.06 (-0.18, 0.31)   | 0.62                 | 0.42                | 0.64                       |
|                                        | Post discharge | 6 trials      | 485                 | -0.001 (-0.10, 0.10) | 0.98                 | 0.01                |                            |
| Fat mass in adolescence (kg)           | In hospital    | 1 trial       | 33                  | -3.14 (-7.40, 1.23)  | 0.15                 | N/A                 | 0.06                       |
|                                        | Post discharge | 1 trial       | 65                  | 1.92 (-1.01, 4.84)   | 0.20                 | N/A                 |                            |

| Outcome                                             | Subgroup       | No. of trials | No. of participants | aMD (95% CI)          | P for overall effect | P for heterogeneity | P for subgroup interaction |
|-----------------------------------------------------|----------------|---------------|---------------------|-----------------------|----------------------|---------------------|----------------------------|
| Fat mass at >3 years (kg)                           | In hospital    | 1 trial       | 33                  | -2.80 (-5.42, -0.18)  | 0.04                 | N/A                 | 0.02                       |
|                                                     | Post discharge | 3 trials      | 309                 | 0.52 (-0.32, 1.37)    | 0.23                 | 0.14                |                            |
| Fat mass index in infancy (kg/m <sup>2</sup> )      | In hospital    | 2 trials      | 84                  | 0.14 (-0.40, 0.68)    | 0.60                 | 0.52                | 0.52                       |
|                                                     | Post discharge | 6 trials      | 482                 | -0.05 (-0.27, 0.18)   | 0.68                 | 0.02                |                            |
| Fat mass index in adolescence (kg/m <sup>2</sup> )  | In hospital    | 1 trial       | 33                  | -1.65 (-3.48, 0.17)   | 0.07                 | N/A                 | 0.02                       |
|                                                     | Post discharge | 1 trial       | 65                  | 1.10 (-0.15, 2.35)    | 0.08                 | N/A                 |                            |
| Fat mass index at >3 years (kg/m <sup>2</sup> )     | In hospital    | 1 trial       | 33                  | -1.45 (-2.81, -0.08)  | 0.04                 | N/A                 | 0.02                       |
|                                                     | Post discharge | 3 trials      | 309                 | 0.32 (-0.12, 0.76)    | 0.16                 | 0.11                |                            |
| Percent fat mass in infancy (%)                     | In hospital    | 2 trials      | 84                  | 0.28 (-2.59, 3.15)    | 0.85                 | 0.86                | 0.56                       |
|                                                     | Post discharge | 6 trials      | 483                 | -0.65 (-1.82, 0.53)   | 0.28                 | 0.04                |                            |
| Percent fat mass in adolescence (%)                 | In hospital    | 1 trial       | 33                  | -5.98 (-11.78, -0.18) | 0.04                 | N/A                 | 0.03                       |
|                                                     | Post discharge | 1 trial       | 65                  | 2.03 (-1.95, 6.02)    | 0.31                 | N/A                 |                            |
| Percent fat mass at >3 years (%)                    | In hospital    | 1 trial       | 33                  | -5.17 (-11.71, 1.38)  | 0.12                 | N/A                 | 0.08                       |
|                                                     | Post discharge | 3 trials      | 309                 | 0.93 (-1.18, 3.04)    | 0.39                 | 0.63                |                            |
| Lean mass in infancy (kg)                           | In hospital    | 2 trials      | 84                  | 0.10 (-0.29, 0.49)    | 0.61                 | 0.03                | 0.82                       |
|                                                     | Post discharge | 6 trials      | 485                 | 0.15 (-0.01, 0.31)    | 0.06                 | 0.10                |                            |
| Lean mass in adolescence (kg)                       | In hospital    | 1 trial       | 33                  | -1.33 (-5.01, 2.35)   | 0.48                 | N/A                 | 0.49                       |
|                                                     | Post discharge | 1 trial       | 65                  | 0.24 (-2.28, 2.77)    | 0.85                 | N/A                 |                            |
| Lean mass at >3 years (kg)                          | In hospital    | 1 trial       | 33                  | -1.54 (-3.99, 0.90)   | 0.22                 | N/A                 | 0.31                       |
|                                                     | Post discharge | 3 trials      | 309                 | -0.21 (-1.00, 0.58)   | 0.60                 | 0.65                |                            |
| Lean mass index in infancy (kg/m <sup>2</sup> )     | In hospital    | 2 trials      | 84                  | 0.20 (-0.46, 0.84)    | 0.55                 | 0.14                | 0.96                       |
|                                                     | Post discharge | 6 trials      | 482                 | 0.22 (-0.05, 0.48)    | 0.11                 | 0.25                |                            |
| Lean mass index in adolescence (kg/m <sup>2</sup> ) | In hospital    | 1 trial       | 33                  | -1.19 (-2.47, 0.09)   | 0.07                 | N/A                 | 0.05                       |
|                                                     | Post discharge | 1 trial       | 65                  | 0.37 (-0.51, 1.25)    | 0.41                 | N/A                 |                            |
| Lean mass index at >3 years (kg/m <sup>2</sup> )    | In hospital    | 1 trial       | 33                  | -1.33 (-2.43, -0.23)  | 0.02                 | N/A                 | 0.03                       |
|                                                     | Post discharge | 3 trials      | 309                 | -0.06 (-0.42, 0.29)   | 0.72                 | 0.29                |                            |

[illegible]

**Table S7. Subgroup analyses of type of supplement**

| Outcome                     | Subgroup       | No. of trials | No. of participants | aMD (95% CI)         | P for overall effect | P for heterogeneity | P for subgroup interaction |
|-----------------------------|----------------|---------------|---------------------|----------------------|----------------------|---------------------|----------------------------|
| BMI                         |                |               |                     |                      |                      |                     |                            |
| BMI in childhood (kg/m²)    | Protein        | 1 trial       | 55                  | -0.61 (-1.80, 0.57)  | 0.30                 | N/A                 | 0.23                       |
|                             | Multicomponent | 2 trials      | 278                 | -0.01 (-0.37, 0.35)  | 0.97                 | 0.46                |                            |
| BMI in infancy (kg/m²)      | Protein        | 3 trials      | 150                 | 0.02 (-0.45, 0.49)   | 0.94                 | 0.69                | 0.98                       |
|                             | Multicomponent | 15 trials     | 1858                | 0.03 (-0.11, 0.16)   | 0.70                 | 0.26                |                            |
| BMI in toddlers (kg/m²)     | Protein        | 2 trials      | 56                  | -0.09 (-0.77, 0.58)  | 0.78                 | 0.47                | 0.95                       |
|                             | Multicomponent | 8 trials      | 1138                | -0.07 (-0.22, 0.08)  | 0.35                 | 0.70                |                            |
| BMI in adolescence (kg/m²)  | Protein        | 1 trial       | 36                  | -2.49 (-4.51, -0.48) | 0.02                 | N/A                 | 0.02                       |
|                             | Multicomponent | 1 trial       | 67                  | 1.40 (-0.48, 3.27)   | 0.14                 | N/A                 |                            |
| BMI at >3 years (kg/m²)     | Protein        | 2 trials      | 91                  | -1.17 (-2.25, -0.10) | 0.03                 | 0.18                | 0.01                       |
|                             | Multicomponent | 3 trials      | 345                 | 0.26 (-0.20, 0.71)   | 0.27                 | 0.06                |                            |
| BMI z-scores in infancy     | Protein        | 3 trials      | 150                 | -0.002 (-0.34, 0.34) | 0.99                 | 0.79                | 0.90                       |
|                             | Multicomponent | 15 trials     | 1858                | 0.02 (-0.08, 0.12)   | 0.69                 | 0.20                |                            |
| BMI z-scores in toddlers    | Protein        | 2 trials      | 56                  | -0.11 (-0.62, 0.39)  | 0.67                 | 0.46                | 0.88                       |
|                             | Multicomponent | 8 trials      | 1138                | -0.07 (-0.18, 0.04)  | 0.21                 | 0.76                |                            |
| BMI z-scores in childhood   | Protein        | 1 trial       | 55                  | -0.29 (-1.01, 0.43)  | 0.43                 | N/A                 | 0.48                       |
|                             | Multicomponent | 2 trials      | 278                 | -0.06 (-0.29, 0.18)  | 0.63                 | 0.51                |                            |
| BMI z-scores in adolescence | Protein        | 1 trial       | 36                  | -1.20 (-2.08, -0.31) | 0.01                 | N/A                 | 0.01                       |
|                             | Multicomponent | 1 trial       | 67                  | 0.47 (-0.17, 1.11)   | 0.15                 | N/A                 |                            |
| BMI z-scores at >3 years    | Protein        | 2 trials      | 91                  | -0.55 (-1.11, 0.02)  | 0.06                 | 0.22                | 0.02                       |
|                             | Multicomponent | 3 trials      | 345                 | 0.04 (-0.18, 0.26)   | 0.73                 | 0.18                |                            |
| Weight                      |                |               |                     |                      |                      |                     |                            |
|                             | Protein        | 3 trials      | 163                 | -0.10 (-0.48, 0.27)  | 0.60                 | 0.83                | 0.30                       |

| Outcome                      | Subgroup       | No. of trials | No. of participants | aMD (95% CI)         | P for overall effect | P for heterogeneity | P for subgroup interaction |
|------------------------------|----------------|---------------|---------------------|----------------------|----------------------|---------------------|----------------------------|
| Weight in infancy (kg)       | Multicomponent | 15 trials     | 1869                | 0.11 (-0.005, 0.22)  | 0.06                 | 0.002               |                            |
| Weight in toddlers (kg)      | Protein        | 2 trials      | 58                  | 0.032 (-0.72, 0.66)  | 0.93                 | 0.31                | 0.91                       |
|                              | Multicomponent | 8 trials      | 1146                | 0.008 (0.14, 0.16)   | 0.92                 | 0.73                |                            |
| Weight in childhood (kg)     | Protein        | 1 trial       | 55                  | -1.74 (-3.61, 0.13)  | 0.07                 | N/A                 | 0.14                       |
|                              | Multicomponent | 2 trials      | 278                 | -0.21 (-1.03, 0.61)  | 0.61                 | 0.43                |                            |
| Weight in adolescence (kg)   | Protein        | 1 trial       | 36                  | -4.58 (-11.46, 2.30) | 0.19                 | N/A                 | 0.11                       |
|                              | Multicomponent | 1 trial       | 67                  | 2.31 (-2.59, 7.21)   | 0.35                 | N/A                 |                            |
| Weight at >3 years (kg)      | Protein        | 2 trials      | 91                  | -2.84 (-5.22, -0.46) | 0.02                 | 0.25                | 0.02                       |
|                              | Multicomponent | 3 trials      | 345                 | 0.29 (-0.92, 1.50)   | 0.64                 | 0.19                |                            |
| Weight z-scores in infancy   | Protein        | 3 trials      | 163                 | 0.01 (-0.32, 0.33)   | 0.97                 | 0.98                | 0.71                       |
|                              | Multicomponent | 15 trials     | 1869                | 0.07 (-0.03, 0.17)   | 0.14                 | 0.004               |                            |
| Weight z-scores in toddlers  | Protein        | 2 trials      | 58                  | -0.22 (-0.72, 0.27)  | 0.38                 | 0.50                | 0.31                       |
|                              | Multicomponent | 8 trials      | 1146                | 0.04 (-0.07, 0.15)   | 0.51                 | 0.65                |                            |
| Weight z-scores in childhood | Protein        | 1 trial       | 53                  | -0.33 (-0.88, 0.23)  | 0.25                 | N/A                 | 0.63                       |
|                              | Multicomponent | 2 trials      | 278                 | -0.18 (-0.42, 0.06)  | 0.14                 | 0.74                |                            |
| Length/ height               |                |               |                     |                      |                      |                     |                            |
| Length in infancy (cm)       | Protein        | 3 trials      | 150                 | -0.47 (-1.75, 0.82)  | 0.48                 | 0.58                | 0.19                       |
|                              | Multicomponent | 15 trials     | 1858                | 0.43 (0.06, 0.79)    | 0.02                 | 0.002               |                            |
| Height in toddlers (cm)      | Protein        | 2 trials      | 56                  | 0.24 (-1.76, 2.25)   | 0.81                 | 0.05                | 0.97                       |
|                              | Multicomponent | 8 trials      | 1142                | 0.20 (-0.24, 0.63)   | 0.37                 | 0.20                |                            |
| Height in childhood (cm)     | Protein        | 1 trial       | 55                  | -2.35 (-5.21, 0.51)  | 0.11                 | N/A                 | 0.32                       |
|                              | Multicomponent | 2 trials      | 279                 | -0.76 (-2.02, 0.50)  | 0.24                 | 0.73                |                            |
| Height in adolescence (cm)   | Protein        | 1 trial       | 36                  | -1.90 (-8.05, 4.25)  | 0.54                 | N/A                 | 0.73                       |
|                              | Multicomponent | 1 trial       | 67                  | -0.56 (-4.94, 3.82)  | 0.80                 | N/A                 |                            |



| Outcome                                | Subgroup       | No. of trials | No. of participants | aMD (95% CI)         | P for overall effect | P for heterogeneity | P for subgroup interaction |
|----------------------------------------|----------------|---------------|---------------------|----------------------|----------------------|---------------------|----------------------------|
| Height at >3 years (cm)                | Protein        | 2 trials      | 91                  | -2.29 (-4.94, 0.36)  | 0.09                 | 0.96                | 0.30                       |
|                                        | Multicomponent | 3 trials      | 346                 | -0.73 (-2.07, 0.61)  | 0.29                 | 0.94                |                            |
| Length z-scores in infancy             | Protein        | 3 trials      | 150                 | -0.07 (-0.45, 0.31)  | 0.71                 | 0.67                | 0.40                       |
|                                        | Multicomponent | 15 trials     | 1858                | 0.10 (-0.01, 0.21)   | 0.07                 | 0.001               |                            |
| Height z-scores in toddlers            | Protein        | 2 trials      | 56                  | -0.24 (-0.80, 0.33)  | 0.41                 | 0.04                | 0.21                       |
|                                        | Multicomponent | 8 trials      | 1142                | 0.14 (0.01, 0.26)    | 0.03                 | 0.16                |                            |
| Height z-scores in childhood           | Protein        | 1 trial       | 55                  | 0.03 (-0.48, 0.53)   | 0.92                 | N/A                 | 0.34                       |
|                                        | Multicomponent | 2 trials      | 279                 | -0.24 (-0.46, -0.02) | 0.03                 | 0.83                |                            |
| Height z-scores in adolescence         | Protein        | 1 trial       | 36                  | -0.44 (-1.13, 0.26)  | 0.22                 | N/A                 | 0.19                       |
|                                        | Multicomponent | 1 trial       | 67                  | 0.14 (-0.36, 0.63)   | 0.59                 | N/A                 |                            |
| Height z-scores at >3 years            | Protein        | 2 trials      | 91                  | -0.14 (-0.53, 0.26)  | 0.50                 | 0.33                | 0.89                       |
|                                        | Multicomponent | 3 trials      | 346                 | -0.17 (-0.37, 0.04)  | 0.11                 | 0.33                |                            |
| Weight for length z-scores in infancy  | Protein        | 3 trials      | 150                 | 0.02 (-0.32, 0.36)   | 0.91                 | 0.91                | 0.99                       |
|                                        | Multicomponent | 15 trials     | 1858                | 0.02 (-0.08, 0.11)   | 0.73                 | 0.22                |                            |
| Weight for length z-scores in toddlers | Protein        | 2 trials      | 56                  | -0.12 (-0.63, 0.39)  | 0.64                 | 0.75                | 0.76                       |
|                                        | Multicomponent | 8 trials      | 1138                | -0.04 (-0.15, 0.07)  | 0.48                 | 0.69                |                            |
| HC                                     |                |               |                     |                      |                      |                     |                            |
| HC in infancy (cm)                     | Protein        | 3 trials      | 163                 | -0.27 (-0.88, 0.34)  | 0.38                 | 0.59                | 0.36                       |
|                                        | Multicomponent | 15 trials     | 1871                | 0.03 (-0.15, 0.21)   | 0.76                 | 0.07                |                            |
| HC in toddlers (cm)                    | Protein        | 2 trials      | 58                  | -0.48 (-1.31, 0.35)  | 0.26                 | 0.79                | 0.40                       |
|                                        | Multicomponent | 9 trials      | 1168                | -0.11 (-0.29, 0.07)  | 0.24                 | 0.30                |                            |
| HC in childhood (cm)                   | Protein        | 1 trial       | 53                  | 0.12 (-0.77, 1.01)   | 0.79                 | N/A                 | 0.40                       |
|                                        | Multicomponent | 2 trials      | 264                 | -0.30 (-0.70, 0.10)  | 0.14                 | 0.63                |                            |
|                                        | Protein        | 3 trials      | 163                 | -0.06 (-0.42, 0.31)  | 0.76                 | 0.64                | 0.77                       |

| Outcome                               | Subgroup       | No. of trials | No. of participants | aMD (95% CI)          | P for overall effect | P for heterogeneity | P for subgroup interaction |
|---------------------------------------|----------------|---------------|---------------------|-----------------------|----------------------|---------------------|----------------------------|
| HC z-scores in infancy                | Multicomponent | 15 trials     | 1871                | -0.001 (-0.11, 0.11)  | 0.99                 | 0.06                | 0.16                       |
| HC z-scores in toddlers               | Protein        | 2 trials      | 58                  | -0.50 (-1.08, 0.09)   | 0.10                 | 0.53                |                            |
|                                       | Multicomponent | 9 trials      | 1168                | -0.07 (-0.20, 0.06)   | 0.32                 | 0.37                |                            |
| Body composition                      |                |               |                     |                       |                      |                     |                            |
| Fat mass in infancy (kg)              | Protein        | 2 trials      | 92                  | 0.04 (-0.19, 0.27)    | 0.74                 | 0.93                | 0.77                       |
|                                       | Multicomponent | 6 trials      | 477                 | 0.001 (-0.10, 0.10)   | 0.98                 | 0.008               |                            |
| Fat mass in adolescence (kg)          | Protein        | 1 trial       | 33                  | -3.14 (-7.40, 1.23)   | 0.15                 | N/A                 | 0.06                       |
|                                       | Multicomponent | 1 trial       | 65                  | 1.92 (-1.01, 4.84)    | 0.20                 | N/A                 |                            |
| Fat mass at >3 years (kg)             | Protein        | 1 trial       | 33                  | -2.80 (-5.42, -0.18)  | 0.04                 | N/A                 | 0.02                       |
|                                       | Multicomponent | 3 trials      | 309                 | 0.52 (-0.32, 1.37)    | 0.23                 | 0.14                |                            |
| Fat mass index in infancy (kg/m²)     | Protein        | 2 trials      | 92                  | -0.08 (-0.59, 0.43)   | 0.76                 | 0.57                | 0.81                       |
|                                       | Multicomponent | 6 trials      | 474                 | -0.01 (-0.24, 0.21)   | 0.92                 | 0.01                |                            |
| Fat mass index in adolescence (kg/m²) | Protein        | 1 trial       | 33                  | -1.65 (-3.48, 0.17)   | 0.07                 | N/A                 | 0.02                       |
|                                       | Multicomponent | 1 trial       | 65                  | 1.10 (-0.15, 2.35)    | 0.08                 | N/A                 |                            |
| Fat mass index at >3 years (kg/m²)    | Protein        | 1 trial       | 33                  | -1.45 (-2.81, -0.08)  | 0.04                 | N/A                 | 0.02                       |
|                                       | Multicomponent | 3 trials      | 309                 | 0.32 (-0.12, 0.76)    | 0.16                 | 0.11                |                            |
| Percent fat mass in infancy (%)       | Protein        | 2 trials      | 92                  | -0.50 (-3.20, 2.20)   | 0.72                 | 0.49                | 0.98                       |
|                                       | Multicomponent | 6 trials      | 475                 | -0.55 (-1.73, 0.64)   | 0.37                 | 0.02                |                            |
| Percent fat mass in adolescence (%)   | Protein        | 1 trial       | 33                  | -5.98 (-11.78, -0.18) | 0.04                 | N/A                 | 0.03                       |
|                                       | Multicomponent | 1 trial       | 65                  | 2.03 (-1.95, 6.02)    | 0.31                 | N/A                 |                            |
| Percent fat mass at >3 years (%)      | Protein        | 1 trial       | 33                  | -5.17 (-11.71, 1.38)  | 0.12                 | N/A                 | 0.08                       |
|                                       | Multicomponent | 3 trials      | 309                 | 0.93 (-1.18, 3.04)    | 0.39                 | 0.63                |                            |

| Outcome                                | Subgroup       | No. of trials | No. of participants | aMD (95% CI)             | P for overall effect | P for heterogeneity | P for subgroup interaction |
|----------------------------------------|----------------|---------------|---------------------|--------------------------|----------------------|---------------------|----------------------------|
| Lean mass in infancy (kg)              | Protein        | 2 trials      | 92                  | 0.18 (-0.19, 0.55)       | 0.33                 | 0.30                | 0.83                       |
|                                        | Multicomponent | 7 trials      | 477                 | 0.14 (-0.03, 0.30)       | 0.10                 | 0.05                |                            |
| Lean mass in adolescence (kg)          | Protein        | 1 trial       | 33                  | -1.33 (-5.01, 2.35)      | 0.48                 | N/A                 | 0.49                       |
|                                        | Multicomponent | 1 trial       | 65                  | 0.24 (-2.28, 2.77)       | 0.85                 | N/A                 |                            |
| Lean mass at >3 years (kg)             | Protein        | 1 trial       | 33                  | -1.54 (-3.99, 0.90)      | 0.22                 | N/A                 | 0.31                       |
|                                        | Multicomponent | 3 trials      | 309                 | -0.21 (-1.00, 0.58)      | 0.60                 | 0.65                |                            |
| Lean mass index in infancy (kg/m²)     | Protein        | 2 trials      | 92                  | -0.03 (-0.63, 0.57)      | 0.93                 | 0.77                | 0.39                       |
|                                        | Multicomponent | 6 trials      | 474                 | 0.26 (-0.01, 0.52)       | 0.06                 | 0.22                |                            |
| Lean mass index in adolescence (kg/m²) | Protein        | 1 trial       | 33                  | -1.19 (-2.47, 0.09)      | 0.07                 | N/A                 | 0.05                       |
|                                        | Multicomponent | 1 trial       | 65                  | 0.37 (-0.51, 1.25)       | 0.41                 | N/A                 |                            |
| Lean mass index at >3 years (kg/m²)    | Protein        | 1 trial       | 33                  | -1.33 (-2.43, -0.23)     | 0.02                 | N/A                 | 0.03                       |
|                                        | Multicomponent | 3 trials      | 309                 | -0.06 (-0.42, 0.29)      | 0.72                 | 0.29                |                            |
| Bone development                       |                |               |                     |                          |                      |                     |                            |
| BMC in infancy (g)                     | Protein        | 2 trials      | 92                  | 13.10 (-4.88, 31.08)     | 0.15                 | 0.19                | 0.71                       |
|                                        | Multicomponent | 4 trials      | 221                 | 8.99 (-2.51, 20.49)      | 0.13                 | 0.20                |                            |
| BMC in adolescence (g)                 | Protein        | 1 trial       | 33                  | -20.18 (-204.06, 163.71) | 0.83                 | N/A                 | 0.92                       |
|                                        | Multicomponent | 1 trial       | 65                  | -31.23 (-157.39, 94.93)  | 0.62                 | N/A                 |                            |
| BMD in infancy                         | Protein        | 2 trials      | 92                  | 0.011 (-0.005, 0.027)    | 0.16                 | 0.65                | 0.59                       |
|                                        | Multicomponent | 3 trials      | 175                 | 0.006 (-0.005, 0.017)    | 0.31                 | 0.53                |                            |
|                                        | Protein        | 1 trial       | 33                  | 0.01 (-0.04, 0.06)       | 0.70                 | N/A                 | 0.36                       |

| Outcome                                                                                                                                                               | Subgroup       | No. of trials | No. of participants | aMD (95% CI)          | P for overall effect | P for heterogeneity | P for subgroup interaction |
|-----------------------------------------------------------------------------------------------------------------------------------------------------------------------|----------------|---------------|---------------------|-----------------------|----------------------|---------------------|----------------------------|
| BMD in adolescence                                                                                                                                                    | Multicomponent | 1 trial       | 65                  | -0.02 (-0.054, 0.017) | 0.28                 | N/A                 |                            |
| Abbreviation: BMI: body mass index; HC: head circumference; BMC: bone mineral content; BMD: bone mineral density; aMD: adjusted mean difference; N/A: not applicable. |                |               |                     |                       |                      |                     |                            |
| Mean differences were adjusted for sex, gestational age and birthweight z-scores.                                                                                     |                |               |                     |                       |                      |                     |                            |

**Table S8.** Subgroup analyses of primary milk feed.

| Outcome                                          | Subgroup | No. of trials | No. of participants | aMD (95% CI)         | P for overall effect | P for heterogeneity | P for subgroup interaction |
|--------------------------------------------------|----------|---------------|---------------------|----------------------|----------------------|---------------------|----------------------------|
| <b>BMI</b>                                       |          |               |                     |                      |                      |                     |                            |
| BMI in childhood (kg/m <sup>2</sup> )            | BM       | 2 trials      | 206                 | -0.26 (-0.71, 0.19)  | 0.25                 | 0.42                | 0.26                       |
|                                                  | Formula  | 1 trial       | 127                 | 0.14 (-0.47, 0.75)   | 0.65                 | N/A                 |                            |
| BMI in infancy (kg/m <sup>2</sup> )              | BM       | 5 trials      | 670                 | 0.02 (-0.21, 0.25)   | 0.88                 | 0.77                | 0.88                       |
|                                                  | Formula  | 11 trials     | 1231                | 0.04 (-0.12, 0.19)   | 0.67                 | 0.11                |                            |
|                                                  | PN+EN    | 2 trials      | 107                 | -0.13 (-0.70, 0.44)  | 0.65                 | 0.79                |                            |
| BMI in toddlers (kg/m <sup>2</sup> )             | BM       | 4 trials      | 526                 | -0.04 (-0.26, 0.19)  | 0.76                 | 0.91                | 0.66                       |
|                                                  | Formula  | 5 trials      | 634                 | -0.10 (-0.29, 0.09)  | 0.31                 | 0.28                |                            |
|                                                  | PN+EN    | 1 trial       | 34                  | -0.63 (-1.66, 0.42)  | 0.22                 | N/A                 |                            |
| BMI in adolescence (kg/m <sup>2</sup> )          | BM       | none          |                     |                      |                      |                     | N/A                        |
|                                                  | Formula  | 2 trials      | 103                 | 0.14 (-1.27, 1.56)   | 0.84                 | 0.02                |                            |
| BMI at >3 years (kg/m <sup>2</sup> )             | BM       | 2 trials      | 206                 | -0.26 (-0.71, 0.19)  | 0.25                 | 0.42                | 0.32                       |
|                                                  | Formula  | 3 trials      | 230                 | 0.14 (-0.56, 0.84)   | 0.70                 | 0.01                |                            |
| BMI z-scores in infancy                          | BM       | 5 trials      | 670                 | -0.008 (-0.18, 0.16) | 0.93                 | 0.87                | 0.77                       |
|                                                  | Formula  | 11 trials     | 1231                | 0.04 (-0.08, 0.15)   | 0.53                 | 0.07                |                            |
|                                                  | PN+EN    | 2 trials      | 107                 | -0.11 (-0.50, 0.28)  | 0.58                 | 0.72                |                            |
| BMI z-scores in toddlers                         | BM       | 4 trials      | 526                 | -0.06 (-0.23, 0.11)  | 0.50                 | 0.89                | 0.66                       |
|                                                  | Formula  | 5 trials      | 634                 | -0.08 (-0.23, 0.06)  | 0.26                 | 0.32                |                            |
|                                                  | PN+EN    | 1 trial       | 34                  | -0.47 (-1.25, 0.33)  | 0.24                 | N/A                 |                            |
| BMI z-scores in childhood                        | BM       | 2 trials      | 206                 | -0.17 (-0.47, 0.12)  | 0.25                 | 0.72                | 0.37                       |
|                                                  | Formula  | 1 trial       | 127                 | 0.03 (-0.34, 0.39)   | 0.88                 | N/A                 |                            |
| BMI z-scores in adolescence (kg/m <sup>2</sup> ) | BM       | none          |                     |                      |                      |                     | N/A                        |
|                                                  | Formula  | 2 trials      | 103                 | -0.08 (-0.60, 0.44)  | 0.76                 | 0.01                |                            |
| BMI z-scores at >3 years                         | BM       | 2 trials      | 206                 | -0.17 (-0.47, 0.12)  | 0.25                 | 0.72                | 0.44                       |
|                                                  | Formula  | 3 trials      | 230                 | -0.03 (-0.33, 0.27)  | 0.84                 | 0.01                |                            |

| Outcome                      | Subgroup | No. of trials | No. of participants | aMD (95% CI)        | P for overall effect | P for heterogeneity | P for subgroup interaction |
|------------------------------|----------|---------------|---------------------|---------------------|----------------------|---------------------|----------------------------|
| Weight                       |          |               |                     |                     |                      |                     |                            |
| Weight in infancy (kg)       | BM       | 5 trials      | 685                 | 0.05 (-0.14, 0.24)  | 0.59                 | 0.63                | 0.33                       |
|                              | Formula  | 11 trials     | 1232                | 0.12 (-0.009, 0.26) | 0.07                 | 0.0006              |                            |
|                              | PN+EN    | 2 trials      | 115                 | -0.26 (-0.72, 0.19) | 0.26                 | 0.36                |                            |
| Weight in toddlers (kg)      | BM       | 4 trials      | 530                 | -0.13 (-0.38, 0.11) | 0.29                 | 0.92                | 0.30                       |
|                              | Formula  | 5 trials      | 637                 | 0.08 (-0.10, 0.27)  | 0.38                 | 0.68                |                            |
|                              | PN+EN    | 1 trial       | 37                  | -0.11 (1.11, 0.89)  | 0.82                 | N/A                 |                            |
| Weight in childhood (kg)     | BM       | 2 trials      | 206                 | -0.85 (-1.81, 0.11) | 0.08                 | 0.30                | 0.21                       |
|                              | Formula  | 1 trial       | 127                 | 0.14 (-1.08, 1.37)  | 0.62                 | N/A                 |                            |
| Weight in adolescence (kg)   | BM       | none          |                     |                     |                      |                     | N/A                        |
|                              | Formula  | 2 trials      | 103                 | 0.01 (-4.01, 4.04)  | 0.99                 | 0.11                |                            |
| Weight at >3 years (kg)      | BM       | 2 trials      | 206                 | -0.87 (-2.43, 0.71) | 0.28                 | 0.30                | 0.38                       |
|                              | Formula  | 3 trials      | 230                 | 0.10 (-1.40, 1.60)  | 0.89                 | 0.06                |                            |
| Weight z-scores in infancy   | BM       | 5 trials      | 685                 | 0.06 (-0.11, 0.23)  | 0.49                 | 0.81                | 0.50                       |
|                              | Formula  | 11 trials     | 1232                | 0.08 (-0.04, 0.20)  | 0.17                 | 0.0026              |                            |
|                              | PN+EN    | 2 trials      | 115                 | -0.18 (-0.57, 0.20) | 0.35                 | 0.18                |                            |
| Weight z-scores in toddlers  | BM       | 4 trials      | 530                 | -0.08 (-0.25, 0.09) | 0.36                 | 0.98                | 0.28                       |
|                              | Formula  | 5 trials      | 637                 | 0.09 (-0.06, 0.23)  | 0.24                 | 0.42                |                            |
|                              | PN+EN    | 1 trial       | 37                  | 0.04 (-0.67, 0.75)  | 0.91                 | N/A                 |                            |
| Weight z-scores in childhood | BM       | 2 trials      | 204                 | -0.24 (-0.52, 0.03) | 0.08                 | 0.81                | 0.59                       |
|                              | Formula  | 1 trial       | 127                 | -0.12 (-0.47, 0.23) | 0.50                 | N/A                 |                            |
| Length                       |          |               |                     |                     |                      |                     |                            |
| Length in infancy (cm)       | BM       | 5 trials      | 670                 | 0.008 (-0.62, 0.63) | 0.98                 | 0.61                | 0.16                       |
|                              | Formula  | 11 trials     | 1231                | 0.59 (0.16, 1.03)   | 0.008                | 0.001               |                            |
|                              | PN+EN    | 2 trials      | 107                 | -0.67 (-2.48, 1.42) | 0.47                 | 0.24                |                            |
| Height in toddlers (cm)      | BM       | 4 trials      | 526                 | -0.41 (-1.13, 0.31) | 0.27                 | 0.53                | 0.04                       |
|                              | Formula  | 5 trials      | 638                 | 0.55 (0.04, 1.07)   | 0.04                 | 0.23                |                            |
|                              | PN+EN    | 1 trial       | 34                  | 0.93 (-1.96, 3.81)  | 0.52                 | N/A                 |                            |
| Height in childhood (cm)     | BM       | 2 trials      | 206                 | -1.31 (-2.78, 0.16) | 0.08                 | 0.44                | 0.51                       |
|                              | Formula  | 1 trial       | 128                 | -0.51 (-2.38, 1.36) | 0.59                 | N/A                 |                            |
| Height in adolescence (cm)   | BM       | None          |                     |                     |                      |                     | N/A                        |
|                              | Formula  | 2 trials      | 103                 | -1.00 (-4.55, 0.56) | 0.58                 | 0.73                |                            |
| Height at >3 years (cm)      | BM       | 2 trials      | 206                 | -1.33 (-3.07, 0.42) | 0.14                 | 0.44                | 0.67                       |
|                              | Formula  | 3 trials      | 231                 | -0.80 (-2.45, 0.86) | 0.34                 | 0.78                |                            |
| Length z-scores in infancy   | BM       | 5 trials      | 670                 | 0.08 (-0.11, 0.28)  | 0.41                 | 0.62                | 0.69                       |
|                              | Formula  | 11 trials     | 1231                | 0.09 (-0.03, 0.22)  | 0.14                 | 0.001               |                            |
|                              | PN+EN    | 2 trials      | 107                 | -0.14 (-0.60, 0.32) | 0.55                 | 0.02                |                            |
|                              | BM       | 4 trials      | 526                 | -0.07 (-0.26, 0.13) | 0.50                 | 0.88                | 0.02                       |

| Outcome                                | Subgroup | No. of trials | No. of participants | aMD (95% CI)         | P for overall effect | P for heterogeneity | P for subgroup interaction |
|----------------------------------------|----------|---------------|---------------------|----------------------|----------------------|---------------------|----------------------------|
| Height z-scores in toddlers            | Formula  | 5 trials      | 638                 | 0.23 (0.07, 0.39)    | 0.005                | 0.07                |                            |
|                                        | PN+EN    | 1 trial       | 34                  | 0.41 (-0.37, 1.18)   | 0.29                 | N/A                 |                            |
| Height z-scores in childhood           | BM       | 2 trials      | 206                 | -0.16 (-0.42, 0.09)  | 0.21                 | 0.36                | 0.64                       |
|                                        | Formula  | 1 trial       | 128                 | -0.26 (-0.59, 0.07)  | 0.12                 | N/A                 |                            |
| Height z-scores in adolescence (cm)    | BM       | None          |                     |                      |                      |                     | N/A                        |
|                                        | Formula  | 2 trials      | 103                 | -0.06 (-0.46, 0.35)  | 0.79                 | 0.19                |                            |
| Height z-scores at >3 years            | BM       | 2 trials      | 206                 | -0.17 (-0.43, 0.09)  | 0.21                 | 0.36                | 0.98                       |
|                                        | Formula  | 3 trials      | 231                 | -0.17(-0.42, 0.08)   | 0.17                 | 0.28                |                            |
| Weight for length z-scores in infancy  | BM       | 5 trials      | 670                 | -0.02 (-0.19, 0.15)  | 0.82                 | 0.98                | 0.87                       |
|                                        | Formula  | 11 trials     | 1231                | 0.03 (-0.08, 0.14)   | 0.60                 | 0.06                |                            |
|                                        | PN+EN    | 2 trials      | 107                 | 0.03 (-0.38, 0.43)   | 0.90                 | 0.65                |                            |
| Weight for length z-scores in toddlers | BM       | 4 trials      | 526                 | -0.07 (-0.23, 0.10)  | 0.43                 | 0.94                | 0.72                       |
|                                        | Formula  | 5 trials      | 634                 | -0.02 (-0.17, 0.12)  | 0.76                 | 0.33                |                            |
|                                        | PN+EN    | 1 trial       | 34                  | -0.40 (-1.19, 0.39)  | 0.31                 | N/A                 |                            |
| HC                                     |          |               |                     |                      |                      |                     |                            |
| HC in infancy (cm)                     | BM       | 5 trials      | 682                 | -0.12 (-0.40, 0.17)  | 0.43                 | 0.57                | 0.05                       |
|                                        | Formula  | 11 trials     | 1231                | 0.14 (-0.09, 0.36)   | 0.23                 | 0.14                |                            |
|                                        | PN+EN    | 2 trials      | 121                 | -0.67 (-1.48, 0.15)  | 0.11                 | 0.37                |                            |
| HC in toddlers (cm)                    | BM       | 4 trials      | 505                 | -0.29 (-0.55, -0.03) | 0.03                 | 0.82                | 0.23                       |
|                                        | Formula  | 5 trials      | 638                 | -0.09 (-0.33, 0.16)  | 0.50                 | 0.28                |                            |
|                                        | PN+EN    | 2 trial       | 83                  | 0.25 (-0.67, 1.17)   | 0.59                 | 0.21                |                            |
| HC in childhood (cm)                   | BM       | 2 trials      | 190                 | -0.26 (-0.72, 0.21)  | 0.28                 | 0.27                | 0.82                       |
|                                        | Formula  | 1 trial       | 128                 | -0.17 (-0.75, 0.40)  | 0.56                 | N/A                 |                            |
| HC z-scores in infancy                 | BM       | 5 trials      | 682                 | -0.001 (-0.17, 0.16) | 0.99                 | 0.61                | 0.70                       |
|                                        | Formula  | 11 trials     | 1231                | 0.009 (-0.13, 0.15)  | 0.90                 | 0.10                |                            |
|                                        | PN+EN    | 2 trials      | 121                 | -0.11 (-0.57, 0.34)  | 0.62                 | 0.03                |                            |
| HC z-scores in toddlers                | BM       | 4 trials      | 505                 | -0.21 (-0.39, -0.03) | 0.03                 | 0.60                | 0.24                       |
|                                        | Formula  | 5 trials      | 638                 | -0.04 (-0.21, 0.14)  | 0.69                 | 0.22                |                            |
|                                        | PN+EN    | 2 trials      | 83                  | 0.17 (-0.45, 0.79)   | 0.59                 | 0.29                |                            |
| Body composition                       |          |               |                     |                      |                      |                     |                            |
| Fat mass in infancy (kg)               | BM       | 1 trial       | 44                  | 0.14 (-0.20, 0.49)   | 0.42                 | N/A                 | 0.42                       |
|                                        | Formula  | 7 trials      | 525                 | -0.003 (-0.10, 0.09) | 0.96                 | 0.02                |                            |
| Fat mass in childhood (kg)             | BM       | 1 trial       | 126                 | -0.11 (-0.97, 0.75)  | 0.80                 | N/A                 | 0.67                       |
|                                        | Formula  | 1 trial       | 118                 | 0.38 (-0.50, 1.27)   | 0.40                 | N/A                 |                            |
| Fat mass in adolescence (kg)           | BM       | None          |                     |                      |                      |                     | N/A                        |
|                                        | Formula  | 2 trials      | 98                  | 0.33 (-2.11, 2.77)   | 0.79                 | 0.06                |                            |
|                                        | BM       | 1 trial       | 126                 | -0.14 (-1.47, 1.20)  | 0.84                 | N/A                 | 0.53                       |

| Outcome                                             | Subgroup | No. of trials | No. of participants | aMD (95% CI)        | P for overall effect | P for heterogeneity | P for subgroup interaction |
|-----------------------------------------------------|----------|---------------|---------------------|---------------------|----------------------|---------------------|----------------------------|
| Fat mass at >3 years (kg)                           | Formula  | 3 trials      | 216                 | 0.40 (-0.62, 1.42)  | 0.44                 | 0.04                |                            |
| Fat mass index in infancy (kg/m <sup>2</sup> )      | BM       | 1 trial       | 44                  | 0.31 (-0.45, 1.07)  | 0.43                 | N/A                 | 0.38                       |
|                                                     | Formula  | 7 trials      | 522                 | -0.04 (-0.26, 0.17) | 0.68                 |                     |                            |
| Fat mass index in childhood (kg/m <sup>2</sup> )    | BM       | 1 trial       | 126                 | -0.07 (-0.66, 0.52) | 0.81                 | N/A                 | 0.43                       |
|                                                     | Formula  | 1 trial       | 118                 | 0.27 (-0.34, 0.89)  | 0.38                 | N/A                 |                            |
| Fat mass index in adolescence (kg/m <sup>2</sup> )  | BM       | None          |                     |                     |                      |                     |                            |
|                                                     | Formula  | 2 trials      | 98                  | 0.25 (-0.80, 1.31)  | 0.63                 | 0.02                |                            |
| Fat mass index at >3 years (kg/m <sup>2</sup> )     | BM       | 1 trial       | 126                 | -0.08 (-0.78, 0.61) | 0.82                 | N/A                 | 0.42                       |
|                                                     | Formula  | 3 trials      | 216                 | 0.28 (-0.25, 0.81)  | 0.30                 | 0.03                |                            |
| Percent fat mass in infancy (%)                     | BM       | 1 trial       | 44                  | 0.63 (-3.41, 4.66)  | 0.76                 | N/A                 | 0.57                       |
|                                                     | Formula  | 7 trials      | 523                 | -0.60 (-1.73, 0.53) | 0.30                 | 0.05                |                            |
| Percent fat mass in childhood (%)                   | BM       | 1 trial       | 126                 | -0.34 (-3.84, 3.17) | 0.85                 | N/A                 | 0.45                       |
|                                                     | Formula  | 1 trial       | 118                 | 1.61 (-2.00, 5.22)  | 0.38                 | N/A                 |                            |
| Percent fat mass in adolescence (%)                 | BM       | None          |                     |                     |                      |                     | N/A                        |
|                                                     | Formula  | 2 trials      | 98                  | -0.50 (-3.82, 2.82) | 0.77                 | 0.03                |                            |
| Percent fat mass at >3 years (%)                    | BM       | 1 trial       | 126                 | -0.33 (-3.65, 3.00) | 0.85                 | N/A                 | 0.62                       |
|                                                     | Formula  | 3 trials      | 216                 | 0.74 (-1.80, 3.27)  | 0.57                 | 0.21                |                            |
| Lean mass in infancy (kg)                           | BM       | 1 trial       | 44                  | 0.31 (-0.24, 0.85)  | 0.27                 | N/A                 | 0.54                       |
|                                                     | Formula  | 7 trials      | 525                 | 0.13 (-0.02, 0.28)  | 0.09                 | 0.11                |                            |
| Lean mass in childhood (kg)                         | BM       | 1 trial       | 126                 | -0.62 (-1.56, 0.32) | 0.20                 | N/A                 | 0.36                       |
|                                                     | Formula  | 1 trial       | 118                 | 0.01 (-0.95, 0.98)  | 0.98                 | N/A                 |                            |
| Lean mass in adolescence (kg)                       | BM       | None          |                     |                     |                      |                     | N/A                        |
|                                                     | Formula  | 2 trials      | 98                  | -0.25 (-2.32, 1.82) | 0.81                 | 0.49                |                            |
| Lean mass at >3 years (kg)                          | BM       | 1 trial       | 126                 | -0.66 (-1.89, 0.58) | 0.30                 | N/A                 | 0.52                       |
|                                                     | Formula  | 3 trials      | 216                 | -0.15 (-1.09, 0.80) | 0.76                 | 0.56                |                            |
| Lean mass index in infancy (kg/m <sup>2</sup> )     | BM       | 1 trial       | 44                  | 0.42 (-0.48, 1.32)  | 0.36                 |                     | 0.63                       |
|                                                     | Formula  | 7 trials      | 522                 | 0.20 (-0.06, 0.45)  | 0.13                 | 0.31                |                            |
| Lean mass index in childhood (kg/m <sup>2</sup> )   | BM       | 1 trial       | 126                 | -0.35 (-0.88, 0.18) | 0.20                 | N/A                 | 0.35                       |
|                                                     | Formula  | 1 trial       | 118                 | 0.01 (-0.53, 0.56)  | 0.97                 | N/A                 |                            |
| Lean mass index in adolescence (kg/m <sup>2</sup> ) | BM       | None          |                     |                     |                      |                     | N/A                        |
|                                                     | Formula  | 2 trials      | 98                  | -0.12 (-0.86, 0.61) | 0.74                 | 0.05                |                            |

| Outcome                                                                                                                                                              | Subgroup | No. of trials | No. of participants | aMD (95% CI)            | P for overall effect | P for heterogeneity | P for subgroup interaction |
|----------------------------------------------------------------------------------------------------------------------------------------------------------------------|----------|---------------|---------------------|-------------------------|----------------------|---------------------|----------------------------|
| Lean mass index at >3 years (kg/m²)                                                                                                                                  | BM       | 1 trial       | 126                 | -0.36 (-0.92, 0.20)     | 0.21                 | N/A                 | 0.44                       |
|                                                                                                                                                                      | Formula  | 3 trials      | 216                 | -0.08 (-0.51, 0.35)     | 0.71                 | 0.11                |                            |
| Bone development                                                                                                                                                     |          |               |                     |                         |                      |                     |                            |
| BMC in infancy (g)                                                                                                                                                   | BM       | None          |                     |                         |                      |                     | N/A                        |
|                                                                                                                                                                      | Formula  | 6 trials      | 313                 | 10.22 (0.52, 19.91)     | 0.04                 | 0.22                |                            |
| BMC in adolescence (g)                                                                                                                                               | BM       | None          |                     |                         |                      |                     | N/A                        |
|                                                                                                                                                                      | Formula  | 2 trials      | 98                  | -27.12 (-130.40, 76.15) | 0.60                 | 0.92                |                            |
| BMD in infancy                                                                                                                                                       | BM       | None          |                     |                         |                      |                     | N/A                        |
|                                                                                                                                                                      | Formula  | 5 trials      | 267                 | 0.008 (-0.001, 0.017)   | 0.10                 | 0.75                |                            |
| BMD in adolescence                                                                                                                                                   | BM       | None          |                     |                         |                      |                     | N/A                        |
|                                                                                                                                                                      | Formula  | 2 trials      | 98                  | -0.009 (-0.038, 0.020)  | 0.53                 | 0.36                |                            |
| Abbreviation: BMI: body mass index; HC: head circumference; BMC: bone mineral content; BMD: bone mineral density; aMD: adjusted mean difference; N/A: not applicable |          |               |                     |                         |                      |                     |                            |
| Mean differences were adjusted for sex, gestational age and birthweight z-scores.                                                                                    |          |               |                     |                         |                      |                     |                            |

Table S9. Subgroup analyse of different epochs.

| Outcome                                 | Subgroup          | No. of trials | No. of participants | aMD (95% CI)         | P for overall effect | P for heterogeneity | P for subgroup interaction |
|-----------------------------------------|-------------------|---------------|---------------------|----------------------|----------------------|---------------------|----------------------------|
| <b>BMI</b>                              |                   |               |                     |                      |                      |                     |                            |
| BMI in childhood (kg/m <sup>2</sup> )   | Before or in 2000 | 1 trial       | 127                 | 0.14 (-0.47, 0.75)   | 0.65                 | N/A                 | 0.26                       |
|                                         | After 2000        | 2 trials      | 206                 | -0.26 (-0.71, 0.19)  | 0.25                 | 0.42                |                            |
| BMI in infancy (kg/m <sup>2</sup> )     | Before or in 2000 | 7 trials      | 1071                | 0.13 (-0.05, 0.30)   | 0.15                 | 0.55                | 0.09                       |
|                                         | After 2000        | 11 trials     | 937                 | -0.09 (-0.28, 0.10)  | 0.34                 | 0.50                |                            |
| BMI in toddlers (kg/m <sup>2</sup> )    | Before or in 2000 | 5 trials      | 864                 | -0.08 (-0.25, 0.09)  | 0.36                 | 0.47                | 0.85                       |
|                                         | After 2000        | 5 trials      | 330                 | -0.05 (-0.32, 0.23)  | 0.73                 | 0.75                |                            |
| BMI in adolescence (kg/m <sup>2</sup> ) | Before or in 2000 | 1 trial       | 67                  | 1.40 (-0.48, 3.27)   | 0.14                 | N/A                 | 0.02                       |
|                                         | After 2000        | 1 trial       | 36                  | -2.49 (-4.51, -0.48) | 0.02                 | N/A                 |                            |
| BMI at >3 years (kg/m <sup>2</sup> )    | Before or in 2000 | 2 trials      | 194                 | 0.57 (-0.17, 1.32)   | 0.13                 | 0.13                | 0.01                       |
|                                         | After 2000        | 3 trials      | 242                 | -0.52 (-1.00, -0.04) | 0.03                 | 0.03                |                            |
| BMI z-scores in infancy                 | Before or in 2000 | 7 trials      | 1071                | 0.10 (-0.03, 0.23)   | 0.06                 | 0.61                | 0.06                       |
|                                         | After 2000        | 11 trials     | 937                 | -0.08 (-0.21, 0.06)  | 0.27                 | 0.43                |                            |



[illegible]

[illegible]

| Outcome                               | Subgroup          | No. of trials | No. of participants | aMD (95% CI)        | P for overall effect | P for heterogeneity | P for subgroup interaction |
|---------------------------------------|-------------------|---------------|---------------------|---------------------|----------------------|---------------------|----------------------------|
| HC in infancy (cm)                    | Before or in 2000 | 7 trials      | 1071                | 0.18 (-0.06, 0.42)  | 0.14                 | 0.83                | 0.04                       |
|                                       | After 2000        | 11 trials     | 963                 | -0.19 (-0.44, 0.06) | 0.14                 | 0.11                |                            |
| HC in toddlers (cm)                   | Before or in 2000 | 5 trials      | 868                 | -0.08 (-0.30, 0.13) | 0.44                 | 0.23                | 0.48                       |
|                                       | After 2000        | 6 trials      | 358                 | -0.22 (-0.55, 0.11) | 0.18                 | 0.56                |                            |
| HC in childhood (cm)                  | Before or in 2000 | 1 trial       | 128                 | -0.17 (-0.75, 0.40) | 0.56                 | N/A                 | 0.82                       |
|                                       | After 2000        | 2 trials      | 190                 | -0.26 (-0.72, 0.21) | 0.28                 | 0.27                |                            |
| HC z-scores in infancy                | Before or in 2000 | 7 trials      | 1071                | 0.02 (-0.12, 0.16)  | 0.77                 | 0.68                | 0.60                       |
|                                       | After 2000        | 11 trials     | 963                 | -0.03 (-0.18, 0.12) | 0.65                 | 0.02                |                            |
| HC z-scores in toddlers               | Before or in 2000 | 5 trials      | 868                 | -0.06 (-0.21, 0.10) | 0.46                 | 0.18                | 0.47                       |
|                                       | After 2000        | 6 trials      | 358                 | -0.16 (-0.39, 0.08) | 0.18                 | 0.48                |                            |
| Body composition                      |                   |               |                     |                     |                      |                     |                            |
| Fat mass in infancy (kg)              | Before or in 2000 | 3 trials      | 151                 | 0.16 (-0.01, 0.35)  | 0.07                 | 0.85                | 0.04                       |
|                                       | After 2000        | 5 trials      | 418                 | -0.05 (-0.16, 0.06) | 0.36                 | 0.008               |                            |
| Fat mass in childhood (kg)            | Before or in 2000 | 1 trial       | 118                 | 0.38 (-0.50, 1.27)  | 0.40                 | N/A                 | 0.67                       |
|                                       | After 2000        | 1 trial       | 126                 | -0.11 (-0.97, 0.75) | 0.80                 | N/A                 |                            |
| Fat mass in adolescence (kg)          | Before or in 2000 | 1 trial       | 65                  | 1.92 (-1.01, 4.84)  | 0.20                 | N/A                 | 0.06                       |
|                                       | After 2000        | 1 trial       | 33                  | -3.14 (-7.40, 1.23) | 0.15                 | N/A                 |                            |
| Fat mass at >3 years (kg)             | Before or in 2000 | 2 trials      | 183                 | 0.96 (-0.14, 2.06)  | 0.09                 | 0.21                | 0.05                       |
|                                       | After 2000        | 2 trials      | 159                 | -0.67 (-1.85, 0.51) | 0.26                 | 0.02                |                            |
| Fat mass index in infancy (kg/m²)     | Before or in 2000 | 3 trials      | 149                 | 0.19 (-0.21, 0.59)  | 0.36                 | 0.04                | 0.23                       |
|                                       | After 2000        | 5 trials      | 417                 | -0.10 (-0.33, 0.14) | 0.44                 | 0.05                |                            |
| Fat mass index in childhood (kg/m²)   | Before or in 2000 | 1 trial       | 118                 | 0.27 (-0.34, 0.89)  | 0.38                 | N/A                 | 0.43                       |
|                                       | After 2000        | 1 trial       | 126                 | -0.07 (-0.66, 0.52) | 0.81                 | N/A                 |                            |
| Fat mass index in adolescence (kg/m²) | Before or in 2000 | 1 trial       | 65                  | 1.10 (-0.15, 2.35)  | 0.08                 | N/A                 | 0.02                       |
|                                       | After 2000        | 1 trial       | 33                  | -1.65 (-3.48, 0.17) | 0.07                 | N/A                 |                            |

| Outcome                                             | Subgroup          | No. of trials | No. of participants | aMD (95% CI)          | P for overall effect | P for heterogeneity | P for subgroup interaction |
|-----------------------------------------------------|-------------------|---------------|---------------------|-----------------------|----------------------|---------------------|----------------------------|
| Fat mass index at >3 years (kg/m <sup>2</sup> )     | Before or in 2000 | 2 trials      | 183                 | 0.58 (0.01, 1.16)     | 0.05                 | 0.21                | 0.03                       |
|                                                     | After 2000        | 2 trials      | 159                 | -0.36 (-0.97, 0.26)   | 0.25                 | 0.03                |                            |
| Percent fat mass in infancy (%)                     | Before or in 2000 | 3 trials      | 150                 | 0.75 (-1.36, 2.86)    | 0.49                 | 0.58                | 0.17                       |
|                                                     | After 2000        | 5 trials      | 417                 | -0.98 (-2.24, 0.29)   | 0.13                 | 0.005               |                            |
| Percent fat mass in childhood (%)                   | Before or in 2000 | 1 trial       | 118                 | 1.61 (-2.00, 5.22)    | 0.38                 | N/A                 | 0.45                       |
|                                                     | After 2000        | 1 trial       | 126                 | -0.34 (-3.84, 3.17)   | 0.85                 | N/A                 |                            |
| Percent fat mass in adolescence (%)                 | Before or in 2000 | 1 trial       | 65                  | 2.03 (-1.95, 6.02)    | 0.31                 | N/A                 | 0.03                       |
|                                                     | After 2000        | 1 trial       | 33                  | -5.98 (-11.78, -0.18) | 0.04                 | N/A                 |                            |
| Percent fat mass at >3 years (%)                    | Before or in 2000 | 2 trials      | 183                 | 1.78 (-0.96, 4.52)    | 0.20                 | 0.86                | 0.13                       |
|                                                     | After 2000        | 2 trials      | 159                 | -1.31 (-4.25, 1.64)   | 0.38                 | 0.12                |                            |
| Lean mass in infancy (kg)                           | Before or in 2000 | 3 trials      | 151                 | 0.32 (0.04, 0.61)     | 0.03                 | 0.43                | 0.15                       |
|                                                     | After 2000        | 5 trials      | 418                 | 0.08 (-0.09, 0.25)    | 0.37                 | 0.09                |                            |
| Lean mass in childhood (kg)                         | Before or in 2000 | 1 trial       | 118                 | 0.01 (-0.95, 0.98)    | 0.98                 | N/A                 | 0.36                       |
|                                                     | After 2000        | 1 trial       | 126                 | -0.62 (-1.56, 0.32)   | 0.20                 | N/A                 |                            |
| Lean mass in adolescence (kg)                       | Before or in 2000 | 1 trial       | 65                  | 0.24 (-2.28, 2.77)    | 0.85                 | N/A                 | 0.49                       |
|                                                     | After 2000        | 1 trial       | 33                  | -1.33 (-5.01, 2.35)   | 0.48                 | N/A                 |                            |
| Lean mass at >3 years (kg)                          | Before or in 2000 | 2 trials      | 183                 | 0.09 (-0.93, 1.12)    | 0.86                 | 0.86                | 0.22                       |
|                                                     | After 2000        | 2 trials      | 159                 | -0.83 (-1.93, 0.26)   | 0.14                 | 0.28                |                            |
| Lean mass index in infancy (kg/m <sup>2</sup> )     | Before or in 2000 | 3 trials      | 149                 | 0.11 (-0.36, 0.59)    | 0.64                 | 0.68                | 0.63                       |
|                                                     | After 2000        | 5 trials      | 417                 | 0.25 (-0.04, 0.53)    | 0.09                 | 0.10                |                            |
| Lean mass index in childhood (kg/m <sup>2</sup> )   | Before or in 2000 | 1 trial       | 118                 | 0.01 (-0.53, 0.56)    | 0.97                 | N/A                 | 0.35                       |
|                                                     | After 2000        | 1 trial       | 126                 | -0.35 (-0.88, 0.18)   | 0.20                 | N/A                 |                            |
| Lean mass index in adolescence (kg/m <sup>2</sup> ) | Before or in 2000 | 1 trial       | 65                  | 0.37 (-0.51, 1.25)    | 0.41                 | N/A                 | 0.05                       |
|                                                     | After 2000        | 1 trial       | 33                  | -1.19 (-2.47, 0.09)   | 0.07                 | N/A                 |                            |
|                                                     | Before or in 2000 | 2 trials      | 183                 | 0.14 (-0.33, 0.60)    | 0.57                 | 0.56                | 0.05                       |

| Outcome                                                                                                                                                               | Subgroup          | No. of trials | No. of participants | aMD (95% CI)             | P for overall effect | P for heterogeneity | P for subgroup interaction |
|-----------------------------------------------------------------------------------------------------------------------------------------------------------------------|-------------------|---------------|---------------------|--------------------------|----------------------|---------------------|----------------------------|
| Lean mass index at >3 years (kg/m²)                                                                                                                                   | After 2000        | 2 trials      | 159                 | -0.55 (-1.04, -0.05)     | 0.03                 | 0.05                |                            |
| Bone development                                                                                                                                                      |                   |               |                     |                          |                      |                     |                            |
| BMC in infancy (g)                                                                                                                                                    | Before or in 2000 | 3 trials      | 152                 | 21.57 (7.75, 35.39)      | 0.002                | 0.69                | 0.03                       |
|                                                                                                                                                                       | After 2000        | 3 trials      | 161                 | -0.50 (-13.87, 12.88)    | 0.94                 | 0.49                |                            |
| BMC in adolescence (g)                                                                                                                                                | Before or in 2000 | 1 trial       | 65                  | -31.23 (-157.39, 94.93)  | 0.62                 | N/A                 | 0.92                       |
|                                                                                                                                                                       | After 2000        | 1 trial       | 33                  | -20.18 (-204.06, 163.71) | 0.83                 | N/A                 |                            |
| BMD in infancy                                                                                                                                                        | Before or in 2000 | 3 trials      | 152                 | 0.013 (0.001, 0.025)     | 0.04                 | 0.94                | 0.22                       |
|                                                                                                                                                                       | After 2000        | 2 trials      | 115                 | 0.001 (-0.013, 0.015)    | 0.87                 | 0.59                |                            |
| BMD in adolescence                                                                                                                                                    | Before or in 2000 | 1 trial       | 65                  | -0.02 (-0.054, 0.017)    | 0.28                 | N/A                 | 0.36                       |
|                                                                                                                                                                       | After 2000        | 1 trial       | 33                  | 0.01 (-0.04, 0.06)       | 0.70                 | N/A                 |                            |
| Abbreviation: BMI: body mass index; HC: head circumference; BMC: bone mineral content; BMD: bone mineral density; aMD: adjusted mean difference; N/A: not applicable. |                   |               |                     |                          |                      |                     |                            |
| Mean differences were adjusted for sex, gestational age and birthweight z-score                                                                                       |                   |               |                     |                          |                      |                     |                            |

Table S10. Search strategies.

| Embase from 1980 to 2019 April 01 |                              |
|-----------------------------------|------------------------------|
| #                                 | Search strategies            |
| 1                                 | exp prematurity/             |
| 2                                 | exp low birth weight/        |
| 3                                 | exp small for date infant/   |
| 4                                 | exp very low birth weight/   |
| 5                                 | (prematu* adj2 infant*).tw.  |
| 6                                 | (prematu* adj2 newborn*).tw. |
| 7                                 | (prematu* adj2 neonate*).tw. |
| 8                                 | preterm.tw.                  |
| 9                                 | low birth weight.tw.         |
| 10                                | low birthweight.tw.          |
| 11                                | VLBW.tw.                     |
| 12                                | LBW.tw.                      |
| 13                                | ELBW.tw.                     |
| 14                                | small for gestation*.tw.     |

|    |                                                                                                                                                                                                       |
|----|-------------------------------------------------------------------------------------------------------------------------------------------------------------------------------------------------------|
| 15 | SGA.tw.                                                                                                                                                                                               |
| 16 | (less than adj6 g).tw.                                                                                                                                                                                |
| 17 | (less than adj3 32 weeks).tw.                                                                                                                                                                         |
| 18 | birth weight below.tw.                                                                                                                                                                                |
| 19 | (gestation* adj2 less than).tw.                                                                                                                                                                       |
| 20 | or/1-19                                                                                                                                                                                               |
| 21 | exp breast feeding/                                                                                                                                                                                   |
| 22 | exp infant nutrition/                                                                                                                                                                                 |
| 23 | exp protein intake/                                                                                                                                                                                   |
| 24 | exp dietary supplement/                                                                                                                                                                               |
| 25 | exp omega 3 fatty acid/ct, ad, dt, ig, pa [Clinical Trial, Drug Administration, Drug Therapy, Intragastric Drug Administration, Parenteral Drug Administration]                                       |
| 26 | exp arachidonic acid/ae, ct, ad, dt, ig, pa, th [Adverse Drug Reaction, Clinical Trial, Drug Administration, Drug Therapy, Intragastric Drug Administration, Parenteral Drug Administration, Therapy] |
| 27 | exp unsaturated fatty acid/ct, dt, pa, th [Clinical Trial, Drug Therapy, Parenteral Drug Administration, Therapy]                                                                                     |
| 28 | exp fat intake/ae, ad, dt [Adverse Drug Reaction, Drug Administration, Drug Therapy]                                                                                                                  |
| 29 | exp enteric feeding/                                                                                                                                                                                  |
| 30 | exp parenteral nutrition/                                                                                                                                                                             |
| 31 | exp artificial milk/                                                                                                                                                                                  |
| 32 | exp breast milk/                                                                                                                                                                                      |
| 33 | exp fortified food/                                                                                                                                                                                   |
| 34 | exp elemental diet/                                                                                                                                                                                   |
| 35 | exp baby food/                                                                                                                                                                                        |
| 36 | (breast milk or human milk).tw.                                                                                                                                                                       |
| 37 | formula.tw.                                                                                                                                                                                           |
| 38 | PUFA supplement*.tw.                                                                                                                                                                                  |
| 39 | feed* regimen*.tw.                                                                                                                                                                                    |
| 40 | (protein* adj2 concentration*).tw.                                                                                                                                                                    |
| 41 | probiotic\$.tw.                                                                                                                                                                                       |
| 42 | parenteral*.tw.                                                                                                                                                                                       |
| 43 | enteral*.tw.                                                                                                                                                                                          |
| 44 | maternal milk.tw.                                                                                                                                                                                     |
| 45 | multinutrient supplement*.tw.                                                                                                                                                                         |
| 46 | (breast fed or breastfed).tw.                                                                                                                                                                         |
| 47 | prebiotic*.tw.                                                                                                                                                                                        |
| 48 | diet* supplement*.tw.                                                                                                                                                                                 |
| 49 | nutrient enriched.tw.                                                                                                                                                                                 |
| 50 | Docosahexaenoic Acid*.tw.                                                                                                                                                                             |
| 51 | arachidonic acid*.tw.                                                                                                                                                                                 |
| 52 | (glutamine adj2 supplement*).tw.                                                                                                                                                                      |
| 53 | (taurine adj2 supplement*).tw.                                                                                                                                                                        |

|    |                                     |
|----|-------------------------------------|
| 54 | (calcium adj2 supplement*).tw.      |
| 55 | palm olein.tw.                      |
| 56 | palmitic acid.tw.                   |
| 57 | (fortification or fortified).tw.    |
| 58 | fatty acids.tw.                     |
| 59 | supplement* feed*.tw.               |
| 60 | complementary feed*.tw.             |
| 61 | nutrition*.tw.                      |
| 62 | Hydrolysed liquid.tw.               |
| 63 | Hydrolyzed liquid.tw.               |
| 64 | gamma-linoleic acid.tw.             |
| 65 | (diet* adj3 protein*).tw.           |
| 66 | or/21-65                            |
| 67 | 20 and 66                           |
| 68 | Clinical Trial/                     |
| 69 | Randomized Controlled Trial/        |
| 70 | exp randomization/                  |
| 71 | Single Blind Procedure/             |
| 72 | Double Blind Procedure/             |
| 73 | Crossover Procedure/                |
| 74 | Placebo/                            |
| 75 | Randomi?ed controlled trial\$.tw.   |
| 76 | Rct.tw.                             |
| 77 | random allocation.tw.               |
| 78 | randomly.tw.                        |
| 79 | randomly allocated.tw.              |
| 80 | allocated randomly.tw.              |
| 81 | (allocated adj2 random).tw.         |
| 82 | Single blind\$.tw.                  |
| 83 | Double blind\$.tw.                  |
| 84 | ((treble or triple) adj blind\$.tw. |
| 85 | placebo\$.tw.                       |
| 86 | prospective study/                  |
| 87 | or/68-86                            |
| 88 | case study/                         |
| 89 | case report.tw.                     |
| 90 | abstract report/ or letter/         |
| 91 | or/88-90                            |
| 92 | 87 not 91                           |
| 93 | 67 and 92                           |

**Table S11. List of excluded studies**

After reading the full texts, we excluded 62 records. The reasons for exclusion and the excluded studies are outlined below.

| Reasons                  | Studies                                                                                                                                                                                                                                                                                                                                                                                                                                                                                                                                                                                                                                                                                                                                                                                                                                                  |
|--------------------------|----------------------------------------------------------------------------------------------------------------------------------------------------------------------------------------------------------------------------------------------------------------------------------------------------------------------------------------------------------------------------------------------------------------------------------------------------------------------------------------------------------------------------------------------------------------------------------------------------------------------------------------------------------------------------------------------------------------------------------------------------------------------------------------------------------------------------------------------------------|
| Wrong intervention       | Bai 2005 [1], Beauport 2017 [2], Bernabe-Garcia 2017 [3], Boehm 1993 [4], Boehm 1991 [5], Boehm 1991 [6], Boehm 1993 [7], Boehm 1990 [8], Bora 2017 [9], Carey 1987 [10], Corpeleijn 2016 [11], Costa 1996 [12], Cristofalo 2011 [13], Cristofalo 2013 [14], dos Santos 1997 [15], Faerk 2000 [16], Faerk 2001 [17], Florendo 2006 [18], Gathwala 2008 [19], Hering 1987 [20], Juhl 2018 [21], Lainwala 2017 [22], Lapillonne 1997 [23], Lapillonne 2004 [24], Maggio 2003 [25], McLeod 2010 [26], Mercado 1990 [27], Merritt 1993 [28], Moro 1989 [29], Moro 1991 [30], Nair 2011 [31], Najm 2017 [32], O'Connor 2016 [33], Sankaran 1996 [34], Salas 2018 [35], Schanler 1988 [36], Siripoonya 1989 [37], Sullivan 2009 [38], Sullivan 2010 [39], Tatwavedi 2018 [40], Techasatid 2017 [41], Unger 2016 [42], Vembenil 2007 [43], Willeitner 2017 [44] |
| Wrong study design       | Bier 2000 [45], Brooke 1987 [46], de Klerk 1997 [47], ElSakka 2016 [48], Gemme 1963 [49], Hanmer 1982 [50], Pittaluga 2011 [51], Yesilipek 1992 [52]                                                                                                                                                                                                                                                                                                                                                                                                                                                                                                                                                                                                                                                                                                     |
| Wrong outcomes           | Bell 1986 [53], Kulkarni 1984 [54], Lou 2017 [55], Lucas 1984 [56]                                                                                                                                                                                                                                                                                                                                                                                                                                                                                                                                                                                                                                                                                                                                                                                       |
| Wrong patient population | de Zegher 2012 [57]                                                                                                                                                                                                                                                                                                                                                                                                                                                                                                                                                                                                                                                                                                                                                                                                                                      |
| Letter/comment           | Davies 1992 [58], Embleton 2017 [59]                                                                                                                                                                                                                                                                                                                                                                                                                                                                                                                                                                                                                                                                                                                                                                                                                     |
| Unable to locate         | Ayutthaya 2006 [60], Misa 1980 [61], Marangione 2009 [62]                                                                                                                                                                                                                                                                                                                                                                                                                                                                                                                                                                                                                                                                                                                                                                                                |

## References

1. Bai XM, Liu ZJ, Li SJ, Xin P, Li G. Comparison of two parenteral nutrition methods in low birth weight premature infants. [Chinese].
2. Beauport L, Schneider J, Faouzi M, Hagmann P, Huppi PS, Tolsa JF, et al. Impact of early nutritional intake on preterm brain: a magnetic resonance imaging study. *Journal of Pediatrics*. 2017;181:29-36 e1. doi:10.1016/j.jpeds.2016.09.073
3. Bernabe-Garcia M, Dominguez-Vallejo P, Cruz-Reynoso L, Villavicencio-Torres A, Villegas-Silva R, Inda-Icaza P. Effect of enteral docosahexaenoic acid on retinopathy of prematurity during their hospital stay. *FASEB Journal Conference: Experimental Biology*. 2017;31(1 Supplement 1).
4. Boehm G, Borte M, Bellstedt K, Moro G, Minoli I. Protein quality of human milk fortifier in low birth weight infants: effects on growth and plasma amino acid profiles. 1993.
5. Boehm G, Borte M, Muller DM, Senger H, Rademacher C. Nutrition of preterm infants with supplemented human milk: EOPROTIN vs human albumin. 1991.
6. Boehm G, Borte M, Muller DM, Senger H, Rademacher C. [Neonatal nutrition with enriched human milk. EOPROTIN 60 in comparison with human albumin]. *Kinderarztliche Praxis*. 1991;59(10):293-8.



7. Boehm G, Muller DM, Senger H, Borte M, Moro G. Nitrogen and fat balances in very low birth weight infants fed human milk fortified with human milk or bovine milk protein. *European Journal of Pediatrics*. 1993;152(3):236-9.
8. Boehm G, Senger H, Friedrich M, Muller DM, Beyreiss K. Protein supplementation of human milk for the nutrition of VLBW-infants: human milk protein vs. meat protein hydrolysate. *Klinische Padiatrie*. 1990;202(5):316-20.
9. Bora R, Murthy NB. In resource limited areas complete enteral feed in stable very low birth weight infants (1000-1500 g) started within 24 h of life can improve nutritional outcome. *Journal of Maternal-Fetal and Neonatal Medicine*. 2017;30(21):2572-7. doi:<http://dx.doi.org/10.1080/14767058.2016.1256992>
10. Carey DE, Rowe JC, Goetz CA, Horak E, Clark RM, Goldberg B. Growth and phosphorus metabolism in premature infants fed human milk, fortified human milk, or special premature formula. Use of serum procollagen as a marker of growth. *American Journal of Diseases of Children*. 1987;141(5):511-5.
11. Corpeleijn WE, de Waard M, Christmann V, van Goudoever JB, Jansen-van der Weide MC, Kooi EM, et al. Effect of Donor Milk on Severe Infections and Mortality in Very Low-Birth-Weight Infants: The Early Nutrition Study Randomized Clinical Trial. *JAMA Pediatrics*. 2016;170(7):654-61.
12. Costa HP, Kopelman BI, de Almeida AC, Polycarpo AC, Giaccio CD. Growth of premature infants fed own mother's milk supplied with two milk formulas. [Portuguese]. *Jornal de Pediatria*. 1996;72(3):164-71.
13. Cristofalo EASRJBCLSSTRUK-KSAGDDJRMLL. Exclusive Human Milk vs Preterm Formula: Randomized Trial in Extremely Preterm Infants. 2011.
14. Cristofalo EA, Schanler RJ, Blanco CL, Sullivan S, Trawoeger R, Kiechl-Kohlendorfer U, et al. Randomized Trial of Exclusive Human Milk versus Preterm Formula Diets in Extremely Premature Infants. *The Journal of Pediatrics*. 2013;163(6):1592-5.e1. doi:10.1016/j.jpeds.2013.07.011
15. dos Santos MM, Martinez FE, Sieber V, Pinhata M, Felin ML. Acceptability and growth of VLBW-infants fed with own mother's milk enriched with a natural or commercial human milk fortifier (HMF). *Pediatric Research*. 1997;231A.
16. Faerk J, Petersen S, Peitersen B, Michaelsen KF. Diet and bone mineral content at term in premature infants. *Pediatric Research*. 2000;47(1):148-56.
17. Faerk J, Petersen S, Peitersen B, Michaelsen KF. Diet, growth, and bone mineralization in premature infants. *Advances in Experimental Medicine and Biology*. 2001;501:479-83.
18. Florendo. A Comparison of Growth in Preterm Infants Fed Two Different Types of Infant Formula Protein. *European Journal of Pediatrics*. 2006;165.
19. Gathwala G, Shaw C, Shaw P, Yadav S, Sen J. Human milk fortification and gastric emptying in the preterm neonate. *International Journal of Clinical Practice*. 2008;62(7):1039-43. doi:<http://dx.doi.org/10.1111/j.1742-1241.2006.01201.x>
20. Hering AE, Vaisman WS, Beca IJP. Evaluation of a modified milk formula in low birth weight neonates. *Revista Chilena de Pediatria*. 1987;58(3):197.
21. Juhl SM, Ye X, Zhou P, Li Y, Iyore EO, Zhang L, et al. Bovine Colostrum for Preterm Infants in the First Days of Life: A Randomized Controlled Pilot Trial. *Journal of Pediatric Gastroenterology and Nutrition*. 2018;66(3):471-8. doi:<http://dx.doi.org/10.1097/MPG.0000000000001774>
22. Lainwala S, Kosyakova N, Spizzoucco AM, Herson V, Brownell EA. Clinical and nutritional outcomes of two liquid human milk fortifiers for premature infants. *Journal of Neonatal-Perinatal Medicine*. 2017;10(4):393-401. doi:<http://dx.doi.org/10.3233/NPM-16164>
23. Lapillonne A, Braillon PM, Glorieux FH, Chambon M, Claris O, Delmas PD, et al. Body composition in very low birthweight (VLBW) infants possible influence of the diet? *Acta Paediatrica*. 1997.

24. Lapillonne A, Salle BL, Glorieux FH, Claris O. Bone mineralization and growth are enhanced in preterm infants fed an isocaloric, nutrient-enriched preterm formula through term. *American Journal of Clinical Nutrition*. 2004;80(6):1595-603.
25. Maggio L, Sawatzki G, Gallini F, Zuppa A, Vento G, Papacci P, et al. Randomized controlled trial on nutritional efficacy of preterm hydrolyzed formula. *Pediatric Research*. 2003;54(4):601.
26. McLeod G, Sherriff J, Hartmann PE, Geddes D, Nathan E, Simmer K. Targeting human milk fortification to achieve preterm infant growth targets - A RCT. *Journal of Paediatrics and Child Health*. 2010;46:13. doi:http://dx.doi.org/10.1111/j.1440-1754.2010.01707.x
27. Mercado M, Yu VY, Gill A. Clinical experience with preterm formulas in very low birthweight infants. *Journal of the Singapore Paediatric Society*. 1990;32(3-4):137-43.
28. Merritt RJ. Effects of type of dietary protein on acid-base status, protein nutritional status, plasma levels of amino acids, and nutrient balance in the very low birth weight infant RJ COOKE, D WATSON, S WERKMAN, ET AL University of Tennessee, Memphis. *Nutrition in Clinical Practice*. 1993;8(4):187. doi:10.1177/088453369300800411
29. Moro G, Fulconis F, Minoli I, Pohlandt F, Raiha N. Plasma amino acid differences in VLBW infants fed either protein fortified human milk or a whey-predominant formula. 1989.
30. Moro GE, Minoli I, Fulconis F, Clementi M, Raiha NC. Growth and metabolic responses in low-birth-weight infants fed human milk fortified with human milk protein or with a bovine milk protein preparation. *Journal of Pediatric Gastroenterology and Nutrition*. 1991;13(2):150-4.
31. Nair JPMJUGNRRCVLS. Early Fortification of Expressed Breast Milk (EBM) Improves Calcium (Ca) and Phosphorus (P) Intake and Reduces Peak Alkaline Phosphatase (AlkP) Level in Premature Neonates. *Pediatric Academic Societies Annual Meeting*; 2009 May 2 5; Baltimore MD, United States. 2011.
32. Najm S, Lofqvist C, Hellgren G, Engstrom E, Lundgren P, Hard AL, et al. Effects of a lipid emulsion containing fish oil on polyunsaturated fatty acid profiles, growth and morbidities in extremely premature infants: A randomized controlled trial. *Clinical Nutrition ESPEN* (no pagination), 2017. 2017;Date of Publication: April 03. doi:http://dx.doi.org/10.1016/j.clnesp.2017.04.004
33. O'Connor DL, Gibbins S, Kiss A, Bando N, Brennan-Donnan J, Ng E, et al. Effect of Supplemental Donor Human Milk Compared With Preterm Formula on Neurodevelopment of Very Low-Birth-Weight Infants at 18 Months: A Randomized Clinical Trial. *JAMA*. 2016;316(18):1897-905.
34. Sankaran K, Papageorgiou A, Ninan A, Sankaran R. A randomized, controlled evaluation of two commercially available human breast milk fortifiers in healthy preterm neonates. *Journal of the American Dietetic Association*. 1996;96(11):1145-9.
35. Salas AA, Li P, Parks K, Lal CV, Martin CR, Carlo WA. Early progressive feeding in extremely preterm infants: A randomized trial. *American Journal of Clinical Nutrition*. 2018;107(3):365-70. doi:http://dx.doi.org/10.1093/ajcn/nqy012
36. Schanler RJ, Abrams SA, Garza C. Efforts to provide fortified human milk to very low birthweight infants. *American Journal of Perinatology*. 1988;5(4):384.
37. Siripoonya P, Sasivimolkul V, Tejavej A, Hotrakitya S, Tontisirin K. Clinical trial of special premature formula for low-birth-weight infants. *Journal of the Medical Association of Thailand*. 1989;72 Suppl 1:61-5.
38. Sullivan S, Schanler R, Abrams S, Ehrenkranz R, the HSG. A Randomized Controlled Trial of Human Versus Bovine-Based Human Milk Fortifiers in Extremely Preterm Infants. *Pediatric Research*. 2009.
39. Sullivan S, Schanler RJ, Kim JH, Patel AL, Trawoger R, Kiechl-Kohlendorfer U, et al. An exclusively human milk-based diet is associated with a lower rate of necrotizing enterocolitis than a diet of human milk and bovine milk-based products. *Journal of Pediatrics*. 2010;156(4):562-7.e1.

40. Tatwavedi D, Nesargi SV, Shankar N, Mathias P, Rao Pn S. Efficacy of modified Tochen's formula for optimum endotracheal tube placement in low birth weight neonates: an RCT. *Journal of Perinatology*. 2018;1-5. doi:<http://dx.doi.org/10.1038/s41372-018-0044-8>
41. Techasatid W, Sapsaprang S, Tantiyavarong P, Luvira A. Effectiveness of multicomponent lipid emulsion in preterm infants requiring parenteral nutrition: A two-center, double-blind randomized clinical trial. *Journal of the Medical Association of Thailand*. 2017;100(9):972-9.
42. Unger S, Gibbins S, Kiss A, Bando N, O'Connor D. Donor milk reduces necrotizing enterocolitis (NEC) but does not improve neurodevelopment of very low birth weight (VLBW) infants at 18 months corrected age. *European Journal of Pediatrics*. 2016;175(11):1507.
43. Vembenil. The Effects of Enteral Protein Type on Feeding Tolerance and Growth Rate in VLBW Infants. *Pediatric Research*. 2007.
44. Willeitner A, Anderson M, Lewis J. Highly Concentrated Preterm Formula as an Alternative to Powdered Human Milk Fortifier: A Randomized Controlled Trial. *Journal of Pediatric Gastroenterology and Nutrition*. 2017;65(5):574-8. doi:<http://dx.doi.org/10.1097/MPG.0000000000001638>
45. Bier JA, Oliver TL, Ferguson AE, Vohr B. Improved developmental outcomes at one year in very low birth weight infants fed human milk. *Paediatric research*. 2000;47(4):176a.
46. Brooke OG, Onubogu O, Heath R, Carter ND. Human milk and preterm formula compared for effects on growth and metabolism. *Archives of Disease in Childhood*. 1987;62(9):917-23.
47. de Klerk A, Schulze KF, Kashyap S, Sahni R, Fifer W, Myers M. Diet and infant behavior. *Acta Paediatrica Supplement*. 1997;422:65-8.
48. El Sakka A, El Shimi MS, Salama K, Fayez H. Post discharge formula fortification of maternal human milk of very low birth weight preterm infants: An introduction of a feeding protocol in a University Hospital. *Pediatric Reports*. 2016;8(3):53-8.
49. Gemme G. [Trial of a New Powered Milk, in Premature and Other Infants]. *Minerva Dietologica*. 1963;18:174-8.
50. Hanmer OJ, Houlsby WT, Thom H, Ross IS, Lloyd DJ, Russell G. Fats as an energy supplement for preterm infants. 1982.
51. Pittaluga E, AR LL, Vernal P, Vega S. Benefits of supplemented preterm formulas on insulin sensitivity and body composition after discharge from the neonatal intensive care unbti. *J Pediatrics*. 2011;159(6):926-32.
52. Yesilipek MA. Standard and low birth weight formulas compared for effects on growth of preterm infants. *Turkish Journal of Pediatrics*. 1992;34(1):31-6.
53. Bell A, Halliday H, McClure G, Reid M. Controlled trial of new formulae for feeding low birth weight infants. *Early Human Development*. 1986;13(1):97-105.
54. Kulkarni PB, Dorand RD, Bridger WM, Payne JH, 3rd, Montiel DC, Hill JG. Rickets in premature infants fed different formulas. *Southern Medical Journal*. 1984;77(1):13-6.
55. Lou RY. Early minimal breastfeeding combined with assisted intervention to improve feeding intolerance in low-birth-weight preterm infants. [Chinese]. *World Chinese Journal of Digestology*. 2017;25(34):3080-3. doi:<http://dx.doi.org/10.11569/wcjd.v25.i34.3080>
56. Lucas A, McLaughlan P, Coombs RR. Latent anaphylactic sensitisation of infants of low birth weight to cows' milk proteins. *British Medical Journal Clinical Research Ed*. 1984;289(6454):1254-6.
57. de Zegher F, Sebastiani G, Diaz M, Sanchez-Infantes D, Lopez-Bermejo A, Ibanez L. Body composition and circulating high-molecular-weight adiponectin and IGF-I in infants born small for gestational age: breast- versus formula-feeding. *Diabetes*. 2012;61(8):1969-73. doi:<http://dx.doi.org/10.2337/db11-1797>

58. Davies DP. Randomized trial of nutrition for preterm infants after discharge. *Archives of Disease in Childhood*. 1992;67(11):1413-4.
59. Embleton N, Cleminson J. Randomized trial of exclusive human milk versus preterm formula diets in extremely premature infants. *Acta Paediatrica, International Journal of Paediatrics*. 2017;106(9):1538. doi:<http://dx.doi.org/10.1111/apa.13820>
60. Ayutthaya JKN. Comparative study between post-discharge formula and standard preterm/term formula on growth and development in premature infants. *The 14th Congress of the Federation of Asia-Oceania Perinatal Societies* 2006. 2006.
61. Misa S, Yatar A, Modanlou H, Cordano A. Growth patterns and biochemical aspects of very low birthweight (LBW) neonates fed whey proteins based formula, breast milk and a standard premature formula. *Pediatric Research*. 1980;14(4):506.
62. Marangione P, Introvini P, Castoldi F, Mancuso D, Balestriero M, Lista G. Effect of Different Dietary Protein Intake on Postnatal Growth and Neurodevelopmental Outcome at 1 Year in VLBW Infants. *Pediatric Research*. 2009.
